# Supplementary material for: Diversity-oriented synthesis enables the rapid development of quinoxaline-based bis-boron fluorophores: photophysical properties and sensing applications
Source: Royal Society of Chemistry journal article supplement (doi:10.1039/d4tc03491k), 2024-01-01

# Supporting Information

## **Diversity-oriented synthesis enables the rapid development of quinoxaline-based bis-boron fluorophores: photophysical properties and sensing applications**

Chaochao Jin <sup>a</sup>, Jiongpei Zhang <sup>a</sup>, Zhihua Wang <sup>a\*</sup>, Daniel B. Werz <sup>b\*</sup> and Jiajing Tan <sup>a\*</sup>

<sup>a</sup> *College of Chemistry, Beijing University of Chemical Technology (BUCT), Beijing 100029, China*

<sup>b</sup> *DFG Cluster of Excellence livMatS @ FIT – Freiburg Center for Interactive Materials and Bioinspired Technologies, University of Freiburg, 79110 Freiburg, Germany; Institute of Organic Chemistry, University of Freiburg, Albertstr. 21, 79104 Freiburg, Germany*

## Table of Content

|                                                                                  |    |
|----------------------------------------------------------------------------------|----|
| I. General information .....                                                     | 3  |
| II. Experimental procedure and characterization data .....                       | 4  |
| II-1. General procedure for quinoxaline-based ligands .....                      | 4  |
| II-2. General procedure for quinoxaline-based bis-boron complexes .....          | 6  |
| II-3. General procedure for Suzuki-Miyaura coupling of bis-boron complexes ..... | 8  |
| II-4. General procedure for Sonogashira coupling of bis-boron complexes .....    | 12 |
| II-5. General procedure for Heck coupling of bis-boron complexes.....            | 14 |
| II-6. General procedure for Stille coupling of bis-boron complexes.....          | 16 |
| II-7. General procedure for Buchwald-Hartwig amination of bis-boron complexes    | 18 |
| II-8. Preparation of ROS and RNS .....                                           | 19 |
| II-9. Preparation of <b>3e-SO</b> from <b>3e</b> and NaClO.....                  | 19 |
| III. Crystallographic and structural refinement data .....                       | 22 |
| IV. Photophysical properties of quinoxaline-based bis-boron complexes .....      | 29 |
| V. Electrochemical studies.....                                                  | 35 |
| VI. DFT calculations .....                                                       | 36 |
| VI. Reference .....                                                              | 45 |
| VII. NMR spectra.....                                                            | 46 |

## I. General information

Unless specified otherwise, all solvents and reactants were purchased from commercial companies, and all reactions were carried out under N<sub>2</sub> atmosphere. A Bruker 400 AVANCE III HD spectrometer was operating at 400 MHz, 101 MHz, 376 MHz, and 128 MHz for <sup>1</sup>H, <sup>13</sup>C, <sup>19</sup>F and <sup>11</sup>B acquisitions, respectively. <sup>1</sup>H NMR spectra were recorded by using tetramethylsilane (TMS, 0 ppm) as an internal standard in CDCl<sub>3</sub>. <sup>13</sup>C NMR spectra were recorded by using residual non-deuterated solvents as an internal standard in CDCl<sub>3</sub> ( $\delta$ =77.16 ppm) or *d*<sub>6</sub>-DMSO ( $\delta$ =39.52 ppm). <sup>19</sup>F NMR and <sup>11</sup>B NMR spectra are unreferenced. High resolution mass spectrums (HRMS) were recorded on an Agilent Q-TOF 6540 mass spectrometer using electrospray ionization. Photoluminescence (PL) spectra, absolute quantum yields, and fluorescence lifetime were collected on a Horiba Jobin Yvon-Edison Fluoromax-4 fluorescence spectrometer and FLS 980 fluorescence spectrophotometer (Edinburgh Instruments Ltd, UK) with a calibrated integrating sphere system. The X-ray diffraction data were collected on an Agilent Xcalibur Eos diffractometer with graphite monochromated Mo K $\alpha$  radiation ( $\lambda$  = 0.71073 Å) using the  $\omega$ -2 $\theta$  scan mode. The thermal gravimetric analysis (TGA) measurements were performed on a TA instruments Q500 from room temperature to 600 °C at a rate of 5°C/min under nitrogen atmosphere. Crystallographic data for **3b**, **3c**, and **3k** reported in this paper have been deposited in the Cambridge Crystallographic Data Centre. (Deposition number: **3b** 2329222, **3c** 2329220, and **3k** 2329221). DFT calculations were conducted on Gaussian 09 program at the B3LYP-D3(BJ)/6-31G(d) basis sets.

## II. Experimental procedure and characterization data

### II-1. General procedure for quinoxaline-based ligands<sup>1</sup>

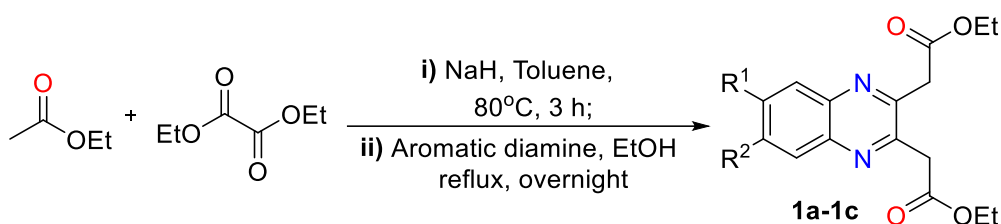

To a 500 mL round-bottom flask equipped with a stir bar was charged with diethyl oxalate (20 mmol, 1.0 equiv.), ethyl acetate (60.0 mmol, 3.0 equiv.) and toluene (60 mL), and then NaH (50.0 mmol, 2.5 equiv., 60% in mineral oil) was added slowly into the mixture at 0 °C in an ice bath. The reaction mixture was heated at 80 °C for 3 hours. After the completion of the reaction, the reaction was quenched with water (2 mL) and then extracted with ethyl acetate (3 × 50 mL), and adjust pH to 5 with 1 mol/L hydrochloric acid, then washed with brine (3 × 20 mL). The combined organic layer was dried by Na<sub>2</sub>SO<sub>4</sub> and concentrated under reduced pressure. The crude products were used for next step without any further purification. The crude product (1.2 equiv.) and corresponding aromatic diamine (5 mmol, 1.0 equiv.) was refluxed in anhydrous EtOH overnight. The solvent was removed under reduced pressure and the residue was purified by silica gel column chromatography (PE/EA = 10:1) to give the products (**1a-1c**).

#### Diethyl 2,2'-(quinoxaline-2,3-diyl)diacetate (**1a**)

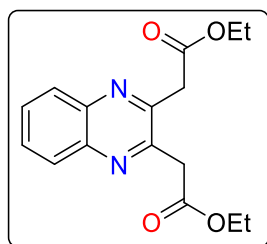

Yellow solid, 4.24 g, 70% yield (PE: EA = 10:1 as the eluent).

<sup>1</sup>H NMR (400 MHz, CDCl<sub>3</sub>) δ 8.05 (dd, *J* = 6.3, 3.5 Hz, 2H), 7.73 (dd, *J* = 6.4, 3.4 Hz, 2H), 4.22 (q, *J* = 7.2 Hz, 4H), 4.15 (s, 4H), 1.27 (t, *J* = 7.1 Hz, 6H).

<sup>13</sup>C NMR (101 MHz, CDCl<sub>3</sub>) δ 169.56, 149.75, 141.35, 129.90, 128.85, 61.51, 42.15, 14.19.

HRMS (ESI) calcd for C<sub>16</sub>H<sub>19</sub>N<sub>2</sub>O<sub>4</sub><sup>+</sup> [M+H]<sup>+</sup> = 303.1339, found 303.1343.

### Diethyl 2,2'-(6-bromoquinoxaline-2,3-diyl)diacetate (1b)

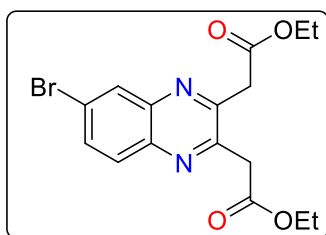

Yellow solid, 5.03g, 65% yield (PE: EA = 8:1 as the eluent).

**<sup>1</sup>H NMR** (400 MHz, CDCl<sub>3</sub>) δ 8.22 (d, *J* = 2.1 Hz, 1H), 7.91 (d, *J* = 9.0 Hz, 1H), 7.81 (dd, *J* = 8.9, 2.2 Hz, 1H), δ 4.21 (q, *J* = 7.1 Hz, 4H), 4.12 (d, *J* = 3.1 Hz, 4H), 1.28 (t, *J* = 7.1 Hz, 3H, CH<sub>3</sub> in Et), 1.27 (t, *J* = 7.1 Hz, 3H, CH<sub>3</sub> in Et).

**<sup>13</sup>C NMR** (101 MHz, CDCl<sub>3</sub>) δ 169.39, 150.84, 150.21, 141.96, 140.15, 133.53, 131.29, 130.26, 123.90, 61.68, 42.16, 14.25.

**HRMS** (ESI) calcd for C<sub>16</sub>H<sub>18</sub>BrN<sub>2</sub>O<sub>4</sub><sup>+</sup> [M+H]<sup>+</sup> = 381.0444, found 381.0452.

### Diethyl 2,2'-(6,7-dibromoquinoxaline-2,3-diyl)diacetate (1c)

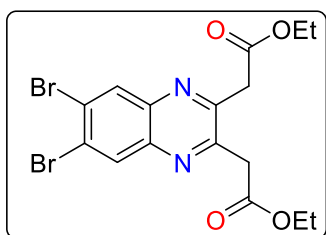

Brown solid, 4.97 g, 54% yield (PE: EA = 8:1 as the eluent).

**<sup>1</sup>H NMR** (400 MHz, CDCl<sub>3</sub>) δ 8.35 (s, 2H), 4.22 (q, *J* = 7.1 Hz, 4H), 4.11 (s, 4H), 1.28 (t, *J* = 7.2 Hz, 6H).

**<sup>13</sup>C NMR** (101 MHz, CDCl<sub>3</sub>) δ 169.20, 151.26, 140.62, 133.06, 126.60, 61.77, 42.17, 14.27.

**HRMS** (ESI) calcd for C<sub>16</sub>H<sub>16</sub>Br<sub>2</sub>N<sub>2</sub>O<sub>4</sub><sup>+</sup> [M+H]<sup>+</sup> = 458.9550, found 458.9552.

## II-2. General procedure for quinoxaline-based bis-boron complexes<sup>2</sup>

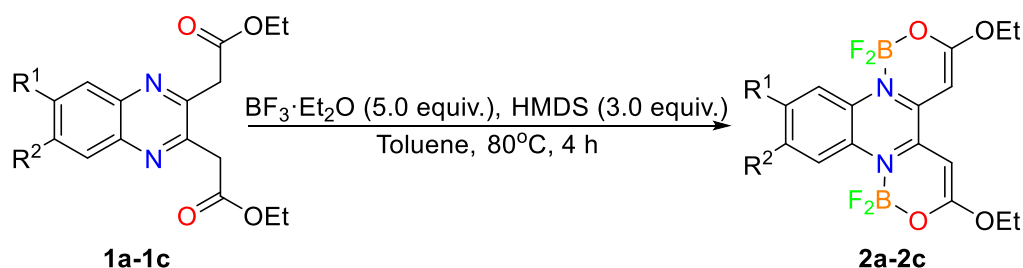

To **1a-1c** (5 mmol) in toluene was added HMDS (3.0 equiv.), and the mixture was stirred for 10 minutes before boron trifluoride etherate (5.0 equiv.) was added via syringe. The reaction mixture was stirring at 80°C for 4 hours. After cooling down to room temperature, the reaction mixture was extracted with dichloromethane (30 mL × 3). The combined organic layer was dried over anhydrous MgSO<sub>4</sub>, filtered, and concentrated under vacuum. The crude product was purified by silica gel column chromatography (PE/DCM = 1/1, v/v) followed by recrystallization from hexane.

### 3,6-Diethoxy-1,1,8,8-tetrafluoro-1,8-dihydro-1λ<sup>4</sup>,8λ<sup>4</sup>,9λ<sup>4</sup>,14λ<sup>4</sup>-bis([1,3,2]oxazaborinino)[3,4-*a*:4',3'-*c*]quinoxaline (**2a**)

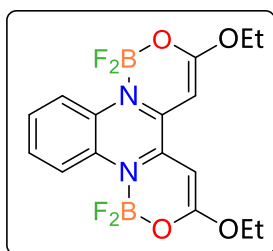

Orange solid, 1.65 g, 83% yield.

<sup>1</sup>H NMR (400 MHz, CDCl<sub>3</sub>) δ 8.16 (dq, *J* = 6.8, 3.3 Hz, 2H), 7.36 (dt, *J* = 6.6, 3.6 Hz, 2H), 5.47 (s, 2H), 4.55 (q, *J* = 7.1 Hz, 4H), 1.47 (t, *J* = 7.1 Hz, 6H).

<sup>13</sup>C NMR (101 MHz, DMSO) δ 169.97, 150.12, 127.69, 126.61, 120.15, 76.73, 65.93, 14.06.

<sup>19</sup>F NMR (376 MHz, CDCl<sub>3</sub>) δ -127.38 (d, *J* = 26.6 Hz).

<sup>11</sup>B NMR (128 MHz, CDCl<sub>3</sub>) δ 2.16.

HRMS (ESI) calcd for C<sub>16</sub>H<sub>17</sub>B<sub>2</sub>F<sub>4</sub>N<sub>2</sub>O<sub>4</sub><sup>+</sup> [M+H]<sup>+</sup> = 399.1305, found 399.1311.

### Ethyl 2-(3-ethoxy-1,1-difluoro-1H-1λ<sup>4</sup>,11λ<sup>4</sup>-[1,3,2]oxazaborinino[3,4-*a*]quinoxalin-5-yl)acetate (**2a-mono**)

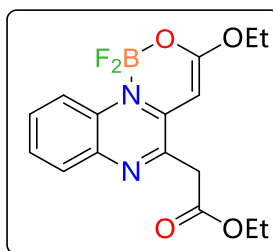

Green-yellow solid, 150.6 mg, 86% yield. (NEt<sub>3</sub> as the base at 25 °C in DCM for 0.5 mmol scale).

**<sup>1</sup>H NMR** (400 MHz, CDCl<sub>3</sub>) δ 8.26 (d, *J* = 8.6 Hz, 1H), 7.87 (dd, *J* = 8.1, 1.6 Hz, 1H), 7.64 (ddd, *J* = 8.7, 7.1, 1.6 Hz, 1H), 7.49 (ddd, *J* = 8.2, 7.1, 1.2 Hz, 1H), 5.25 (s, 1H), 4.49 (t, *J* = 7.1 Hz, 2H), 4.25 (q, *J* = 7.1 Hz, 2H), 3.94 (s, 2H), 1.42 (t, *J* = 7.1 Hz, 3H), 1.27 (t, *J* = 7.1 Hz, 3H).

**<sup>13</sup>C NMR** (101 MHz, CDCl<sub>3</sub>) δ 169.58, 168.57, 149.51, 148.21, 137.48, 131.61, 130.79, 129.79, 126.56, 120.38, 74.55, 64.79, 61.75, 42.54, 14.35, 14.14.

**<sup>19</sup>F NMR** (376 MHz, CDCl<sub>3</sub>) δ -127.96 (dd, *J* = 33.3, 13.2 Hz).

**<sup>11</sup>B NMR** (128 MHz, CDCl<sub>3</sub>) δ 2.24 (t, *J* = 17.5 Hz).

**HRMS** (ESI) calcd for C<sub>16</sub>H<sub>18</sub>BF<sub>2</sub>N<sub>2</sub>O<sub>4</sub><sup>+</sup> [M+H]<sup>+</sup> = 351.1322, found 351.1330.

**11-Bromo-3,6-diethoxy-1,1,8,8-tetrafluoro-1,8-dihydro-1λ<sup>4</sup>,8λ<sup>4</sup>,9λ<sup>4</sup>,14λ<sup>4</sup>-bis([1,3,2]oxazaborinino)[3,4-*a*:4',3'-*c*]quinoxaline (2b)**

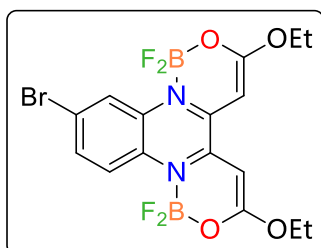

Brown solid, 1.83 g, 77% yield.

**<sup>1</sup>H NMR** (400 MHz, CDCl<sub>3</sub>) δ 8.26 (q, *J* = 2.2 Hz, 1H), 7.98 (dt, *J* = 9.2, 2.6 Hz, 1H), 7.44 (dd, *J* = 9.2, 2.1 Hz, 1H), δ 5.46 (d, *J* = 5.9 Hz, 1H), 4.53 (q, *J* = 7.1 Hz, 2H, CH<sub>2</sub> in Et), 4.52 (q, *J* = 7.1 Hz, 2H, CH<sub>2</sub> in Et), 1.45 (t, *J* = 7.1, 3H, CH<sub>3</sub> in Et), 1.44 (t, *J* = 7.1, 3H, CH<sub>3</sub> in Et).

**<sup>13</sup>C NMR** (101 MHz, CDCl<sub>3</sub>) δ 170.66, 170.49, 149.58, 149.25, 130.01, 129.19, 127.25, 123.52, 123.44, 123.36, 122.23, 122.15, 122.07, 120.47, 65.91, 65.79, 14.36.

**<sup>19</sup>F NMR** (376 MHz, CDCl<sub>3</sub>) δ -127.50, -127.57, -127.63.

**<sup>11</sup>B NMR** (128 MHz, CDCl<sub>3</sub>) δ 2.01.

**HRMS** (ESI) calcd for C<sub>16</sub>H<sub>16</sub>B<sub>2</sub>BrF<sub>4</sub>N<sub>2</sub>O<sub>4</sub><sup>+</sup> [M+H]<sup>+</sup> = 477.0410, found 477.0427.

**11,12-Dibromo-3,6-diethoxy-1,1,8,8-tetrafluoro-1,8-dihydro-1λ<sup>4</sup>,8λ<sup>4</sup>,9λ<sup>4</sup>,14λ<sup>4</sup>-bis([1,3,2]oxazaborinino)[3,4-*a*:4',3'-*c*]quinoxaline (2c)**

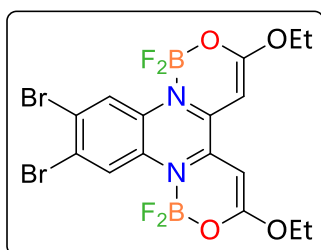

Brown solid, 1.78 g, 64% yield.

**<sup>1</sup>H NMR** (400 MHz, CDCl<sub>3</sub>) δ 8.35 (s, 2H), 5.50 (s, 2H), 4.55 (q, *J* = 7.1 Hz, 4H), 1.45 (t, *J* = 7.1 Hz, 6H).

\*We attempted to use CDCl<sub>3</sub>, *d*<sub>6</sub>-DMSO, and CD<sub>3</sub>CN as deuterated solvents. However, due to the poor solubility, the <sup>13</sup>C and <sup>11</sup>B NMR of **2c** were not obtained.

**<sup>19</sup>F NMR** (376 MHz, CDCl<sub>3</sub>) δ -127.77 – -127.95 (m).

**HRMS** (ESI) calcd for C<sub>16</sub>H<sub>15</sub>B<sub>2</sub>Br<sub>2</sub>F<sub>4</sub>N<sub>2</sub>O<sub>4</sub><sup>+</sup> [M+H]<sup>+</sup> = 554.9515, found 554.9531.

### II-3. General procedure for Suzuki-Miyaura coupling of bis-boron complexes<sup>3</sup>

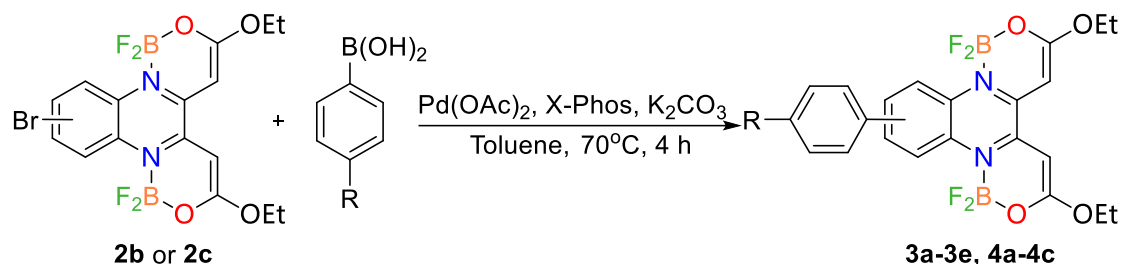

An oven-dried Schlenk tube was charged with compound **2b** or **2c** (0.5 mmol), arylboronic acid (2.0 equiv.), Pd(OAc)<sub>2</sub> (0.05 equiv.), X-Phos (0.2 equiv.), and K<sub>2</sub>CO<sub>3</sub> (3.0 equiv.). The reaction vessel was evacuated and backfilled with nitrogen, 1 mL of toluene was then added via syringe. The reaction mixture was stirring at 70°C for 4 hours. After cooling to room temperature, the crude product was purified by silica gel flash chromatography (PE /DCM = 2:1) to afford the target product.

#### 3,6-diethoxy-1,1,8,8-tetrafluoro-11-phenyl-1,8-dihydro-1λ<sup>4</sup>,8λ<sup>4</sup>,9λ<sup>4</sup>,14λ<sup>4</sup>-bis([1,3,2]oxazaborinino)[3,4-*a*:4',3'-*c*]quinoxaline (**3a**)

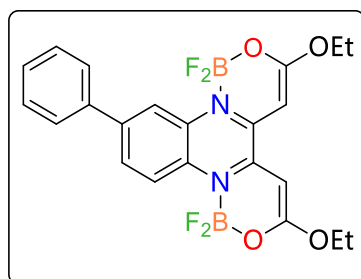

Orange solid, 203.8 mg, 86% yield. (PE/DCM = 2: 1 as eluent)

<sup>1</sup>H NMR (400 MHz, CDCl<sub>3</sub>) δ 8.38 (d, *J* = 2.5 Hz, 1H), 8.22 (dt, *J* = 9.0, 2.9 Hz, 1H), 7.71 – 7.68 (m, 2H), 7.63 (dd, *J* = 8.9, 2.0 Hz, 1H), 7.47 (td, *J* = 7.2, 6.3, 1.3 Hz, 2H), 7.42 – 7.37 (m, 1H), 5.47 (d, *J* = 2.1 Hz, 2H), 4.52 (q, *J* = 7.1 Hz, 2H, CH<sub>2</sub> in Et), 4.52 (q, *J* = 7.1 Hz, 2H, CH<sub>2</sub> in Et), 1.47 (t, *J* = 7.1 Hz, 6H).

<sup>13</sup>C NMR (101 MHz, CDCl<sub>3</sub>) δ 170.32, 170.20, 149.56, 149.07, 139.95, 139.62, 129.10, 128.10, 127.37, 126.06, 121.33, 121.26, 121.26, 121.19, 119.03, 76.42, 76.29, 65.57, 14.40.

<sup>19</sup>F NMR (376 MHz, CDCl<sub>3</sub>) δ -127.20 (d, *J* = 28.6 Hz), -127.50 (d, *J* = 28.8 Hz).

<sup>11</sup>B NMR (128 MHz, CDCl<sub>3</sub>) δ 2.18.

HRMS (ESI) calcd for C<sub>22</sub>H<sub>21</sub>B<sub>2</sub>F<sub>4</sub>N<sub>2</sub>O<sub>4</sub><sup>+</sup> [M+H]<sup>+</sup> = 475.1618, found 475.1634.

#### 3,6-diethoxy-1,1,8,8-tetrafluoro-11-(4-(trifluoromethyl)phenyl)-1,8-dihydro-1λ<sup>4</sup>,8λ<sup>4</sup>,9λ<sup>4</sup>,14λ<sup>4</sup>-bis([1,3,2]oxazaborinino)[3,4-*a*:4',3'-*c*]quinoxaline (**3b**)



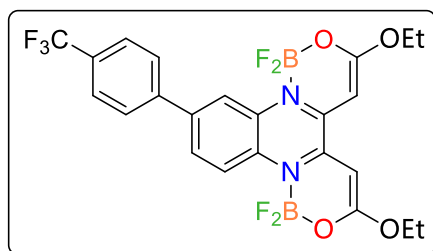

Green solid, 238.5 mg, 88% yield. (PE/DCM = 2:1 as eluent)

$^1\text{H NMR}$  (400 MHz,  $\text{CDCl}_3$ )  $\delta$  8.37 (d,  $J = 2.5$  Hz, 1H), 8.22 (dt,  $J = 9.0, 2.8$  Hz, 1H), 7.74 (q,  $J = 8.4$  Hz, 4H), 7.60 (dd,  $J = 8.9, 1.9$  Hz, 1H), 5.50 (s, 2H), 4.56 (q,  $J = 7.1$  Hz, 4H), 1.48 (t,  $J = 7.1$  Hz, 6H).

$^{13}\text{C NMR}$  (101 MHz,  $\text{CDCl}_3$ )  $\delta$  170.46, 149.65, 149.28, 143.12, 138.18, 128.71, 128.18, 127.64, 125.96 (q,  $J = 271.8$  Hz), 125.88 (q,  $J = 32.3$  Hz), 121.36 (q,  $J = 3.4$  Hz), 119.25, 76.70, 65.73, 14.37.

$^{19}\text{F NMR}$  (376 MHz,  $\text{CDCl}_3$ )  $\delta$  -62.49, -127.35 (dd,  $J = 89.3, 29.4$  Hz).

$^{11}\text{B NMR}$  (128 MHz,  $\text{CDCl}_3$ )  $\delta$  2.12.

HRMS (ESI) calcd for  $\text{C}_{23}\text{H}_{20}\text{B}_2\text{F}_7\text{N}_2\text{O}_4^+$   $[\text{M}+\text{H}]^+ = 543.1492$ , found 543.1512.

**11-(4-(9H-carbazol-9-yl)phenyl)-3,6-diethoxy-1,1,8,8-tetrafluoro-1,8-dihydro-1 $\lambda^4$ ,8 $\lambda^4$ ,9 $\lambda^4$ ,14 $\lambda^4$ -bis([1,3,2]oxazaborinino)[3,4-a:4',3'-c]quinoxaline (3c)**

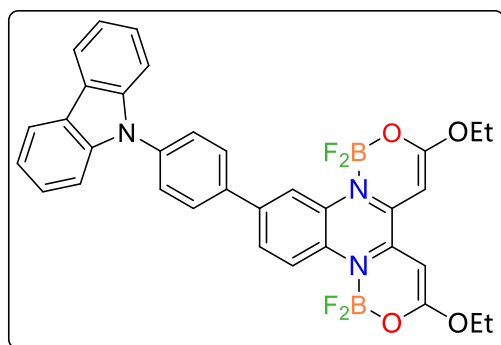

Yellow solid, 204.5 mg, 64% yield. (PE/DCM = 1: 1 as eluent)

$^1\text{H NMR}$  (400 MHz,  $\text{CDCl}_3$ )  $\delta$  8.48 – 8.46 (m, 1H), 8.27 (d,  $J = 8.9$  Hz, 1H), 8.15 (d,  $J = 7.7$  Hz, 2H), 7.89 (d,  $J = 8.4$  Hz, 2H), 7.69 (t,  $J = 8.2$  Hz, 3H), 7.51 (d,  $J = 8.1$  Hz, 2H), 7.47 – 7.41 (m, 2H), 7.30 (t,  $J = 7.0$  Hz, 2H), 5.51 (d,  $J = 2.0$  Hz, 2H), 4.55 (q,  $J = 7.1$  Hz, 2H,  $\text{CH}_2$  in Et), 4.54 (q,  $J = 7.1$  Hz, 2H,  $\text{CH}_2$  in Et), 1.49 (t,  $J = 7.1$  Hz, 6H).

$^{13}\text{C NMR}$  (101 MHz,  $\text{CDCl}_3$ )  $\delta$  169.65, 148.88, 148.39, 140.13, 138.17, 137.88, 136.90, 128.02, 127.12, 126.83, 125.39, 125.16, 122.84, 120.69, 119.67, 119.41, 109.26, 75.82, 75.72, 64.86, 13.62.

$^{19}\text{F NMR}$  (376 MHz,  $\text{CDCl}_3$ )  $\delta$  -127.10, -127.43.

$^{11}\text{B NMR}$  (128 MHz,  $\text{CDCl}_3$ )  $\delta$  2.30.

HRMS (ESI) calcd for  $\text{C}_{34}\text{H}_{28}\text{B}_2\text{F}_4\text{N}_3\text{O}_4^+$   $[\text{M}+\text{H}]^+ = 640.2197$ , found 640.2211.

**3,6-diethoxy-1,1,8,8-tetrafluoro-11-(4-methoxyphenyl)-1,8-dihydro-1 $\lambda^4$ ,8 $\lambda^4$ ,9 $\lambda^4$ ,14 $\lambda^4$ -bis([1,3,2]oxazaborinino)[3,4-a:4',3'-c]quinoxaline (3d)**

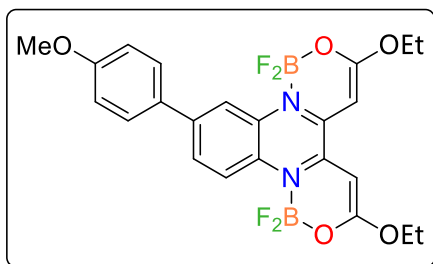

Red solid, 161.3 mg, 81% yield. (PE/DCM = 2:1 as eluent)

$^1\text{H NMR}$  (400 MHz,  $\text{CDCl}_3$ )  $\delta$  8.26 (d,  $J = 2.5$  Hz, 1H), 8.11 (dt,  $J = 9.1, 2.9$  Hz, 1H), 7.58 – 7.47 (m, 3H), 6.93 (d,  $J = 8.8$  Hz, 2H), 5.40 (d,  $J = 4.5$  Hz, 2H), 4.45 (q,  $J = 7.1$  Hz, 2H,  $\text{CH}_2$  in Et), 4.45 (q,  $J = 7.1$  Hz, 2H,  $\text{CH}_2$  in Et), 3.79 (s, 3H), 1.37 (t,  $J = 7.1$ , 3H,  $\text{CH}_3$  in Et), 1.37 (t,  $J = 7.1$ , 3H,  $\text{CH}_3$  in Et).

$^{13}\text{C NMR}$  (101 MHz,  $\text{CDCl}_3$ )  $\delta$  170.27, 170.08, 159.87, 149.54, 148.88, 139.65, 135.27, 132.10, 128.48, 127.24, 125.74, 121.23, 118.42, 114.57, 76.36, 76.10, 65.52, 55.54, 14.42.

$^{19}\text{F NMR}$  (376 MHz,  $\text{CDCl}_3$ )  $\delta$  -127.21 (d,  $J = 25.8$  Hz), -127.54 (d,  $J = 24.0$  Hz).

$^{11}\text{B NMR}$  (128 MHz,  $\text{CDCl}_3$ )  $\delta$  2.19.

**HRMS** (ESI) calcd for  $\text{C}_{23}\text{H}_{24}\text{B}_2\text{F}_4\text{N}_2\text{O}_5^+$   $[\text{M}+\text{H}]^+ = 505.1724$ , found 505.1746.

**3,6-Diethoxy-1,1,8,8-tetrafluoro-11-(4-(methylthio)phenyl)-1,8-dihydro-1 $\lambda^4$ ,8 $\lambda^4$ ,9 $\lambda^4$ ,14 $\lambda^4$ -bis([1,3,2]oxazaborinino)[3,4-*a*:4',3'-*c*]quinoxaline (3e)**

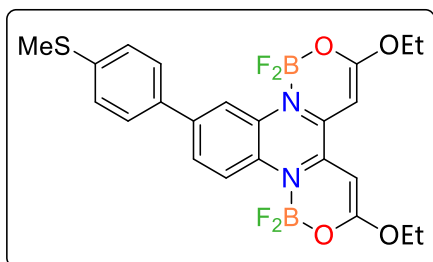

Red solid, 184.6 mg, 71% yield. (PE/DCM = 2:1 as eluent)

$^1\text{H NMR}$  (400 MHz,  $\text{CDCl}_3$ )  $\delta$  8.35 (s, 1H), 8.19 (d,  $J = 8.9$  Hz, 1H), 7.59 (d,  $J = 8.3$  Hz, 3H), 7.34 (d,  $J = 8.2$  Hz, 2H), 5.47 (d,  $J = 2.6$  Hz, 2H), 4.52 (q,  $J = 7.1$  Hz, 2H,  $\text{CH}_2$  in Et), 4.51 (q,  $J = 7.1$  Hz, 2H,  $\text{CH}_2$  in Et), 2.53 (s, 3H), 1.44 (t,  $J = 7.1$  Hz, 6H).

$^{13}\text{C NMR}$  (101 MHz,  $\text{CDCl}_3$ )  $\delta$  170.31, 170.17, 149.55, 148.98, 139.22, 138.84, 136.25, 128.77, 127.63, 127.03, 125.69, 121.30, 118.55, 76.44, 76.28, 65.58, 65.52, 15.89, 14.41, 14.38.

$^{19}\text{F NMR}$  (376 MHz,  $\text{CDCl}_3$ )  $\delta$  -127.18 (d,  $J = 22.4$  Hz), -127.49 (d,  $J = 23.2$  Hz).

$^{11}\text{B NMR}$  (128 MHz,  $\text{CDCl}_3$ )  $\delta$  2.19.

**HRMS** (ESI) calcd for  $\text{C}_{23}\text{H}_{24}\text{B}_2\text{F}_4\text{N}_2\text{O}_4\text{S}^+$   $[\text{M}+\text{H}]^+ = 521.1495$ , found 521.1496.

**3,6-Diethoxy-1,1,8,8-tetrafluoro-11,12-diphenyl-1,8-dihydro-1 $\lambda^4$ ,8 $\lambda^4$ ,9 $\lambda^4$ ,14 $\lambda^4$ -bis([1,3,2]oxazaborinino)[3,4-*a*:4',3'-*c*]quinoxaline (4a)**

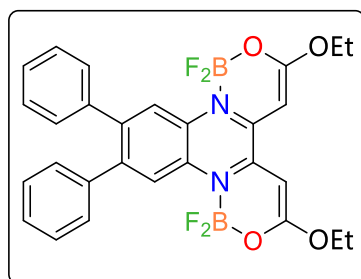

Orange solid, 209.0 mg, 76% yield. (PE/DCM = 2:1 as eluent)

$^1\text{H NMR}$  (400 MHz,  $\text{CDCl}_3$ )  $\delta$  8.21 (t,  $J = 2.8$  Hz, 2H), 7.27 – 7.22 (m, 6H), 7.19 (dd,  $J = 6.8, 3.1$  Hz, 4H), 5.48 (s, 2H), 4.51 (q,  $J = 7.1$  Hz, 4H), 1.43 (t,  $J = 7.1$  Hz, 6H).

$^{13}\text{C NMR}$  (101 MHz,  $\text{CDCl}_3$ )  $\delta$  170.17, 149.16, 140.12, 139.71, 129.95, 128.05, 127.49, 127.07, 122.35 (t,  $J = 7.2$  Hz), 76.32, 65.44, 14.25.

$^{19}\text{F NMR}$  (376 MHz,  $\text{CDCl}_3$ )  $\delta$  -127.40, -127.47.

$^{11}\text{B NMR}$  (128 MHz,  $\text{CDCl}_3$ )  $\delta$  2.17.

**HRMS** (ESI) calcd for  $\text{C}_{28}\text{H}_{26}\text{BF}_2\text{N}_2\text{O}_4^+$   $[\text{M}+\text{H}]^+ = 551.1931$ , found 551.1933.

**3,6-Diethoxy-1,1,8,8-tetrafluoro-11,12-bis(4-(trifluoromethyl)phenyl)-1,8-dihydro-1 $\lambda^4$ ,8 $\lambda^4$ ,9 $\lambda^4$ ,14 $\lambda^4$ -bis([1,3,2]oxazaborinino)[3,4-*a*:4',3'-*c*]quinoxaline (4b)**

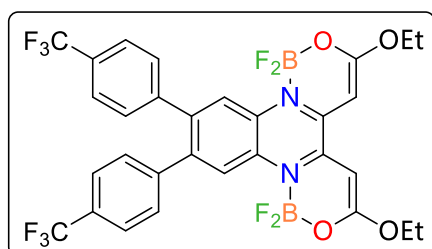

Green-yellow solid, 281.3 mg, 82% yield. (PE/DCM = 2: 1 as eluent)

$^1\text{H NMR}$  (400 MHz,  $\text{CDCl}_3$ )  $\delta$  8.18 (s, 2H), 7.52 (d,  $J = 8.0$  Hz, 4H), 7.28 (d,  $J = 8.1$  Hz, 4H), 5.54 (s, 2H), 4.55 (d,  $J = 7.1$  Hz, 4H), 1.46 (t,  $J = 7.1$  Hz, 6H).

$^{13}\text{C NMR}$  (101 MHz,  $\text{CDCl}_3$ )  $\delta$  170.64, 149.55, 143.41, 137.86, 132.17, 130.31, 129.82 (q,  $J = 32.2$  Hz), 125.43 (q,  $J = 3.7$  Hz), 124.18 (q,  $J = 272.2$  Hz), 122.76, 122.69, 65.89, 14.36.

$^{19}\text{F NMR}$  (376 MHz,  $\text{CDCl}_3$ )  $\delta$  -62.51, -127.45 (d,  $J = 19.3$  Hz).

$^{11}\text{B NMR}$  (128 MHz,  $\text{CDCl}_3$ )  $\delta$  2.16.

**HRMS** (ESI) calcd for  $\text{C}_{30}\text{H}_{23}\text{B}_2\text{F}_{10}\text{N}_2\text{O}_4^+$   $[\text{M}+\text{H}]^+ = 687.1679$ , found 687.1684.

**3,6-Diethoxy-1,1,8,8-tetrafluoro-11,12-bis(4-methoxyphenyl)-1,8-dihydro-1 $\lambda^4$ ,8 $\lambda^4$ ,9 $\lambda^4$ ,14 $\lambda^4$ -bis([1,3,2]oxazaborinino)[3,4-*a*:4',3'-*c*]quinoxaline (4c)**

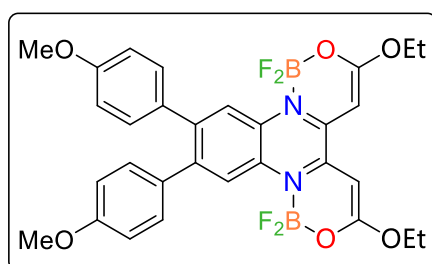

Red solid, 225.8 mg, 74% yield. (PE/DCM = 2: 1 as eluent)

$^1\text{H NMR}$  (400 MHz,  $\text{CDCl}_3$ )  $\delta$  8.07 (t,  $J = 2.5$  Hz, 2H), 7.03 (d,  $J = 8.6$  Hz, 4H), 6.70 (d,  $J = 8.6$  Hz, 4H), 5.36 (s, 2H), 4.39 (q,  $J = 7.1$  Hz, 4H), 3.69 (s, 6H), 1.31 (t,  $J = 7.1$  Hz, 6H).

$^{13}\text{C NMR}$  (101 MHz,  $\text{CDCl}_3$ )  $\delta$  170.11, 158.85, 149.05, 139.34, 132.75, 131.09, 127.37, 122.19, 113.66, 76.21, 65.44, 55.29, 14.29.

$^{19}\text{F NMR}$  (376 MHz,  $\text{CDCl}_3$ )  $\delta$  -127.33, -127.38.

$^{11}\text{B NMR}$  (128 MHz,  $\text{CDCl}_3$ )  $\delta$  2.16.

HRMS (ESI) calcd for  $\text{C}_{30}\text{H}_{30}\text{B}_2\text{F}_4\text{N}_2\text{O}_6^+$   $[\text{M}+\text{H}]^+ = 611.2142$ , found 611.2141.

## II-4. General procedure for Sonogashira coupling of bis-boron complexes<sup>4</sup>

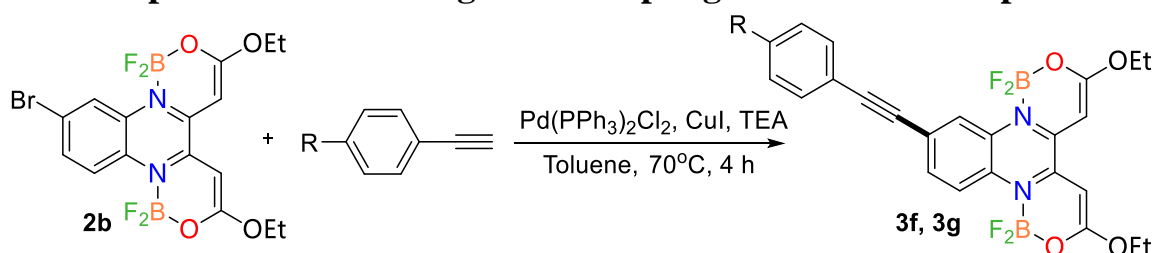

Under  $\text{N}_2$  atmosphere, compound **2b** (0.5 mmol), phenylacetylene (1.2 equiv.),  $\text{Pd}(\text{PPh}_3)_2\text{Cl}_2$  (0.05 equiv.), and CuI (0.1 equiv.) were dissolved in triethylamine (1 mL) and toluene (1 ml), the flask was vacuumed and back-filled with  $\text{N}_2$  for several times. The solution was stirred at 70°C for 4 hours. The solvent then was removed under reduced pressure and the crude product was purified by column chromatography (PE:DCM =2:1 as the eluent) to afford the target product.

### 3,6-Diethoxy-1,1,8,8-tetrafluoro-11-(phenylethynyl)-1,8-dihydro-1 $\lambda^4$ ,8 $\lambda^4$ ,9 $\lambda^4$ ,14 $\lambda^4$ -bis([1,3,2]oxazaborinino)[3,4-*a*:4',3'-*c*]quinoxaline (**3f**)

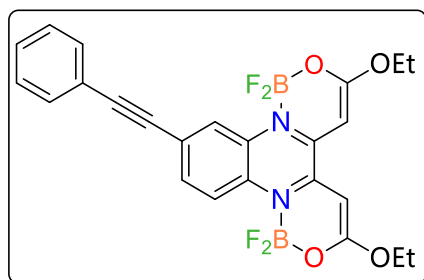

Orange solid, 169.3 mg, 68% yield. (PE/DCM = 1:1 as eluent)

$^1\text{H NMR}$  (400 MHz,  $\text{CDCl}_3$ )  $\delta$  8.28 (d,  $J = 2.2$  Hz, 1H), 8.09 (d,  $J = 8.9$  Hz, 2H), 7.57 (dd,  $J = 6.5, 3.2$  Hz, 3H), 7.47 (dd,  $J = 8.9, 1.7$  Hz, 1H), 7.40 – 7.32 (m, 5H), 5.47 (d,  $J = 2.3$  Hz, 2H), 4.53 (q,  $J = 7.1$  Hz, 2H,  $\text{CH}_2$  in Et), 4.52 (q,  $J = 7.1$  Hz, 2H,  $\text{CH}_2$  in Et), 1.44 (t,  $J = 7.1$ , 3H,  $\text{CH}_3$  in Et), 1.44 (t,  $J = 7.1$ , 3H,  $\text{CH}_3$  in Et).

$^{13}\text{C NMR}$  (101 MHz,  $\text{CDCl}_3$ )  $\delta$  170.44, 149.57, 149.16, 131.91, 130.12, 128.70, 128.50, 128.21, 128.09, 123.59 (t,  $J = 7.1$  Hz), 122.98, 122.19, 120.93 (t,  $J = 6.9$  Hz), 91.43, 88.76, 76.68, 65.73, 14.36.

$^{19}\text{F NMR}$  (376 MHz,  $\text{CDCl}_3$ )  $\delta$  -127.39 (d,  $J = 26.6$  Hz).

$^{11}\text{B NMR}$  (128 MHz,  $\text{CDCl}_3$ )  $\delta$  2.10.

HRMS (ESI) calcd for  $\text{C}_{24}\text{H}_{21}\text{B}_2\text{F}_4\text{N}_2\text{O}_4^+$   $[\text{M}+\text{H}]^+ = 499.1618$ , found 499.1636.

**3,6-Diethoxy-1,1,8,8-tetrafluoro-11-((4-methoxyphenyl)ethynyl)-1,8-dihydro-1 $\lambda^4$ ,8 $\lambda^4$ ,9 $\lambda^4$ ,14 $\lambda^4$ -bis([1,3,2]oxazaborinino)[3,4-*a*:4',3'-*c*]quinoxaline (3g)**

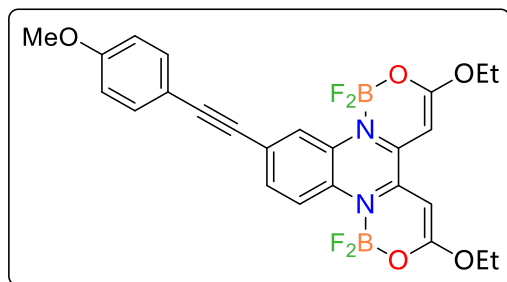

Orange solid, 186.9 mg, 73% yield. (PE/DCM = 1:1 as eluent)

**$^1\text{H}$  NMR** (400 MHz,  $\text{CDCl}_3$ )  $\delta$  8.28 (q,  $J = 2.3$  Hz, 1H), 8.11 (dt,  $J = 9.0, 2.8$  Hz, 1H), 7.51 (d,  $J = 8.7$  Hz, 2H), 7.46 (dd,  $J = 8.9, 1.7$  Hz, 1H), 6.90 (d,  $J = 8.8$  Hz, 2H), 5.47 (s, 2H), 4.53 (q,  $J = 7.1$  Hz, 2H,  $\text{CH}_2$  in Et), 4.52 (q,  $J = 7.1$  Hz, 2H,  $\text{CH}_2$  in Et), 1.44 (t,  $J = 7.1$ , 3H,  $\text{CH}_3$  in Et), 1.44 (t,  $J = 7.1$ , 3H,  $\text{CH}_3$  in Et).

**$^{13}\text{C}$  NMR** (101 MHz,  $\text{CDCl}_3$ )  $\delta$  170.39, 170.31, 159.99, 149.54, 149.04, 133.37, 129.95, 128.22, 127.85, 123.29, 122.54, 120.85, 115.03, 114.16, 91.59, 87.59, 76.66, 76.60, 65.67, 55.42, 14.33.

**$^{19}\text{F}$  NMR** (376 MHz,  $\text{CDCl}_3$ )  $\delta$  -127.37 (q,  $J = 23.1, 20.4$  Hz).

**$^{11}\text{B}$  NMR** (128 MHz,  $\text{CDCl}_3$ )  $\delta$  2.09.

**HRMS** (ESI) calcd for  $\text{C}_{25}\text{H}_{23}\text{B}_2\text{F}_4\text{N}_2\text{O}_5^+$   $[\text{M}+\text{H}]^+ = 529.1724$ , found 529.1727.

## II-5. General procedure for Heck coupling of bis-boron complexes<sup>5</sup>

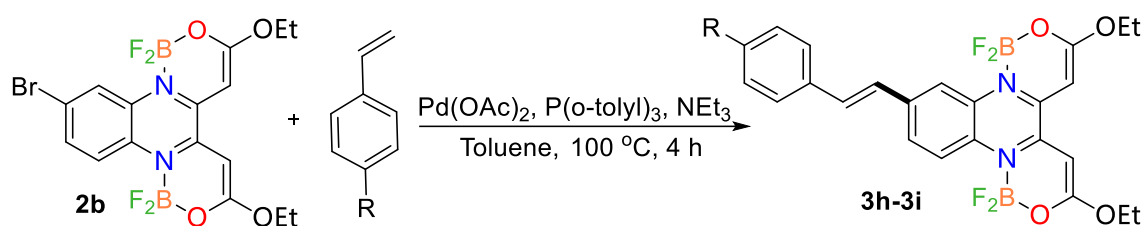

A Schlenk tube was charged with **2b** (0.5 mmol), styrene (1.5 equiv.), Pd(OAc)<sub>2</sub> (0.05 equiv.), P(*o*-tolyl)<sub>3</sub> (0.1 equiv.), toluene (1 mL) and triethylamine (1 mL). The flask was degassed and purged with nitrogen for three times. The mixture was heated at 100 °C for 4 hours. After cooling to room temperature, the crude product was purified by silica gel flash chromatography (PE/DCM = 1:1) to afford the target product.

### **(E)-3,6-Diethoxy-1,1,8,8-tetrafluoro-11-styryl-1,8-dihydro-1 $\lambda^4$ ,8 $\lambda^4$ ,9 $\lambda^4$ ,14 $\lambda^4$ -bis([1,3,2]oxazaborinino)[3,4-*a*:4',3'-*c*]quinoxaline (3h)**

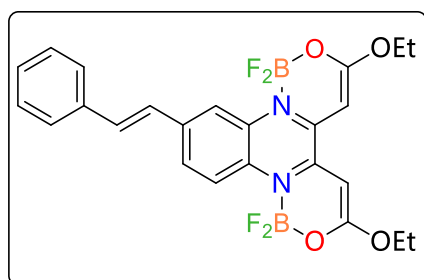

Red solid, 185.0 mg, 74% yield. (PE/DCM = 1:1 as eluent)

<sup>1</sup>H NMR (400 MHz, CDCl<sub>3</sub>)  $\delta$  8.17 (s, 1H), 8.13 (d,  $J$  = 8.9 Hz, 1H), 7.54 (t,  $J$  = 8.2 Hz, 3H), 7.36 (t,  $J$  = 7.5 Hz, 2H), 7.27 (d,  $J$  = 7.3 Hz, 1H), 7.17 – 7.12 (m, 2H), 5.43 (d,  $J$  = 4.7 Hz, 2H), 5.29 (s, 1H), 4.52 (q,  $J$  = 7.1 Hz, 2H, CH<sub>2</sub> in Et), 4.51 (q,  $J$  = 7.1 Hz, 2H, CH<sub>2</sub> in Et), 1.44 (t,  $J$  = 7.1, 3H, CH<sub>3</sub> in Et), 1.43 (t,  $J$  = 7.1, 3H, CH<sub>3</sub> in Et).

<sup>13</sup>C NMR (101 MHz, CDCl<sub>3</sub>)  $\delta$  170.23, 170.04, 149.49, 148.70, 136.97, 136.39, 130.61, 128.84, 128.73, 128.15, 127.44, 126.91, 124.80,  $\delta$  121.17 (t,  $J$  = 8.1 Hz), 118.92, 76.37, 76.22, 65.54, 14.40.

<sup>19</sup>F NMR (376 MHz, CDCl<sub>3</sub>)  $\delta$  -127.14 (d,  $J$  = 21.7 Hz), -127.46 (d,  $J$  = 22.3 Hz).

<sup>11</sup>B NMR (128 MHz, CDCl<sub>3</sub>)  $\delta$  2.13.

HRMS (ESI) calcd for C<sub>24</sub>H<sub>23</sub>B<sub>2</sub>F<sub>4</sub>N<sub>2</sub>O<sub>4</sub><sup>+</sup> [M+H]<sup>+</sup> = 501.1775, found 501,1789.

### **(E)-4-(2-(3,6-Diethoxy-1,1,8,8-tetrafluoro-1,8-dihydro-1 $\lambda^4$ ,8 $\lambda^4$ ,9 $\lambda^4$ ,14 $\lambda^4$ -bis([1,3,2]oxazaborinino)[3,4-*a*:4',3'-*c*]quinoxalin-11-yl)vinyl)-N,N-dimethylaniline (3i)**

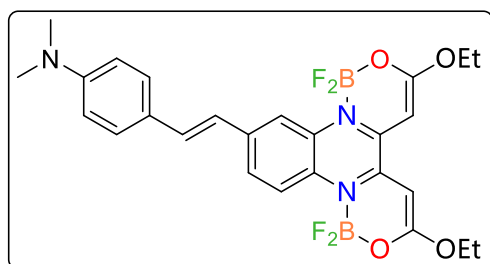

Black-gray solid, 187.4 mg, 69% yield. (PE/DCM = 1:1 as eluent)

**<sup>1</sup>H NMR** (400 MHz, CDCl<sub>3</sub>) δ 8.07 (d, *J* = 2.4 Hz, 1H), 8.03 (dt, *J* = 9.1, 2.9 Hz, 1H), 7.48 (dd, *J* = 9.1, 1.8 Hz, 1H), 7.42 – 7.34 (m, 2H), 7.05 (d, *J* = 16.2 Hz, 1H), 6.88 (d, *J* = 16.2 Hz, 1H), 6.65 (d, *J* = 8.4 Hz, 2H), 5.37 (d, *J* = 7.3 Hz, 2H), 4.45 (q, *J* = 7.1 Hz, 2H, CH<sub>2</sub> in Et), 4.43 (q, *J* = 7.1 Hz, 2H, CH<sub>2</sub> in Et), 1.38 (t, *J* = 7.1, 3H, CH<sub>3</sub> in Et), 1.36 (t, *J* = 7.1, 3H, CH<sub>3</sub> in Et).

**<sup>13</sup>C NMR** (101 MHz, CDCl<sub>3</sub>) δ 170.13, 169.81, 150.06, 149.44, 148.35, 137.47, 130.86, 128.87, 128.15, 127.28, 126.01, 124.61, 123.33, 121.10, 118.13, 112.86, 76.20, 75.88, 65.45, 65.35, 40.87, 14.43.

**<sup>19</sup>F NMR** (376 MHz, CDCl<sub>3</sub>) δ -127.21 (d, *J* = 24.5 Hz), -127.59 (d, *J* = 21.7 Hz).

**<sup>11</sup>B NMR** (128 MHz, CDCl<sub>3</sub>) δ 2.16.

**HRMS** (ESI) calcd for C<sub>26</sub>H<sub>28</sub>B<sub>2</sub>F<sub>4</sub>N<sub>3</sub>O<sub>4</sub><sup>+</sup> [M+H]<sup>+</sup> = 544.2197, found 544.2191.

## II-6. General procedure for Stille coupling of bis-boron complexes<sup>6</sup>

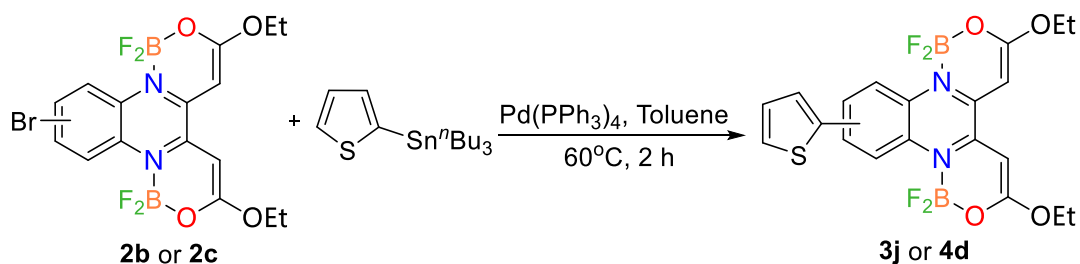

An oven-dried Schlenk tube was charged with **2b/2c** (0.5 mmol) and Pd(PPh<sub>3</sub>)<sub>4</sub> (0.05 equiv.) under nitrogen. After adding the dry toluene (3 mL) and tributyl(thiophen-2-yl)stannane (1.3 equiv.) via syringe, the mixture was kept stirring at 60°C for 2 hours. After cooling to room temperature, water was added, and the crude mixture was extracted with DCM (10 mL). The organic layers were combined, washed with brine and dried over magnesium sulfate. The solvents were removed under vacuum and the residue was chromatographed on a silica gel column (PE/DCM = 2:1) to afford the target product.

### 3,6-Diethoxy-1,1,8,8-tetrafluoro-11-(thiophen-2-yl)-1,8-dihydro-1 $\lambda^4$ ,8 $\lambda^4$ ,9 $\lambda^4$ ,14 $\lambda^4$ -bis([1,3,2]oxazaborinino)[3,4-*a*:4',3'-*c*]quinoxaline (**3j**)

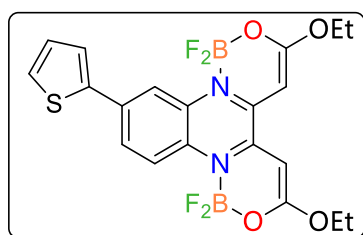

Deep-red solid, 240.0 mg, 84% yield. (PE/DCM = 2: 1 as eluent)

<sup>1</sup>H NMR (400 MHz, CDCl<sub>3</sub>)  $\delta$  8.38 (d,  $J$  = 2.3 Hz, 1H), 8.14 (dt,  $J$  = 9.0, 2.8 Hz, 1H), 7.59 (dd,  $J$  = 8.9, 2.0 Hz, 1H), 7.42 (dd,  $J$  = 3.6, 1.2 Hz, 1H), 7.33 (dd,  $J$  = 5.1, 1.1 Hz, 1H), 7.10 (dd,  $J$  = 5.1, 3.6 Hz, 1H), 5.46 (d,  $J$  = 4.9 Hz, 2H), 4.52 (q,  $J$  = 7.1 Hz, 2H, CH<sub>2</sub> in Et), 4.51 (q,  $J$  = 7.1 Hz, 2H, CH<sub>2</sub> in Et), 1.44 (t,  $J$  = 7.1, 3H, CH<sub>3</sub> in Et), 1.43 (t,  $J$  = 7.1, 3H, CH<sub>3</sub> in Et).

<sup>13</sup>C NMR (101 MHz, CDCl<sub>3</sub>)  $\delta$  170.25, 170.02, 149.48, 148.72, 142.78, 133.20, 128.67, 128.30, 127.49, 125.96, 124.79, 124.39, 121.27, 121.19, 117.25, 76.44, 76.17, 65.41, 14.24.

<sup>19</sup>F NMR (376 MHz, CDCl<sub>3</sub>)  $\delta$  -127.35 (d,  $J$  = 26.1 Hz), -127.53 (d,  $J$  = 26.2 Hz).

<sup>11</sup>B NMR (128 MHz, CDCl<sub>3</sub>)  $\delta$  2.20 (d,  $J$  = 17.6 Hz).

HRMS (ESI) calcd for C<sub>20</sub>H<sub>19</sub>B<sub>2</sub>F<sub>4</sub>N<sub>2</sub>O<sub>4</sub>S<sup>+</sup> [M+H]<sup>+</sup> = 481.1182, found 481.1198.



**3,6-Diethoxy-1,1,8,8-tetrafluoro-11,12-di(thiophen-2-yl)-1,8-dihydro-1 $\lambda^4$ ,8 $\lambda^4$ ,9 $\lambda^4$ ,14 $\lambda^4$ -bis([1,3,2]oxazaborinino)[3,4-*a*:4',3'-*c*]quinoxaline (4d)**

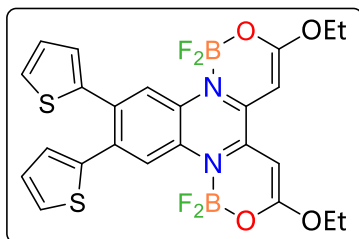

Deep-red solid, 281.1 mg, 81% yield. (PE/DCM = 2: 1 as eluent)

**<sup>1</sup>H NMR** (400 MHz, CDCl<sub>3</sub>) δ 8.30 (s, 2H), 7.34 (dd, *J* = 4.6, 1.7 Hz, 2H), 7.04 – 6.99 (m, 4H), 5.52 (s, 2H), 4.55 (q, *J* = 7.1 Hz, 4H), 1.47 (t, *J* = 7.1 Hz, 6H).

**<sup>13</sup>C NMR** (101 MHz, CDCl<sub>3</sub>) 170.32, 149.21, 141.25, 132.72, 127.97, 127.55, 127.03, 126.85, 122.50 (t, *J* = 7.4 Hz), 65.58, 14.24.

**<sup>19</sup>F NMR** (376 MHz, CDCl<sub>3</sub>) δ -127.59, -127.65.

**<sup>11</sup>B NMR** (128 MHz, CDCl<sub>3</sub>) δ 2.12.

**HRMS** (ESI) calcd for C<sub>24</sub>H<sub>22</sub>B<sub>2</sub>F<sub>4</sub>N<sub>2</sub>O<sub>4</sub>S<sub>2</sub><sup>+</sup> [M+H]<sup>+</sup> = 563.1059, found 563.1055.

## II-7. General procedure for Buchwald-Hartwig amination of bis-boron complexes<sup>7</sup>

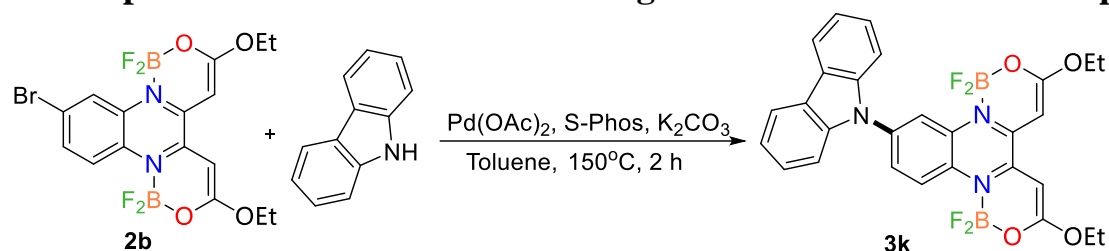

An oven-dried Schlenk tube was charged with **2b** (0.5 mmol), 9H-carbazole (1.2 equiv.), Pd(OAc)<sub>2</sub> (0.05 equiv.), S-Phos (0.1 equiv.), and *t*-BuOK (3.0 equiv.). The reaction vessel was evacuated and backfilled again with nitrogen for three times before toluene (1 mL) was added via syringe. The reaction mixture was kept stirring at 150°C for 2 hours. After cooling to room temperature, the crude product was purified by silica gel flash chromatography (PE/DCM = 1:1 as eluent) to afford **3k** (281.6 mg, 62% yield) as a purple solid.

### 11-(9H-Carbazol-9-yl)-3,6-diethoxy-1,1,8,8-tetrafluoro-1,8-dihydro-1λ<sup>4</sup>,8λ<sup>4</sup>,9λ<sup>4</sup>,14λ<sup>4</sup>-bis([1,3,2]oxazaborinino)[3,4-*a*:4',3'-*c*]quinoxaline (**3k**)

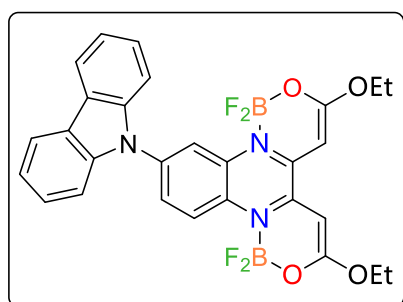

<sup>1</sup>H NMR (400 MHz, CDCl<sub>3</sub>) δ 8.34 (d, *J* = 2.5 Hz, 1H), 8.27 (dt, *J* = 9.2, 2.6 Hz, 1H), 8.06 (d, *J* = 7.7 Hz, 2H), 7.54 (dd, *J* = 9.2, 2.2 Hz, 1H), 7.50 (d, *J* = 8.3 Hz, 2H), 7.40 – 7.34 (m, 2H), 7.23 (t, *J* = 7.4 Hz, 2H), 5.44 (d, *J* = 4.8 Hz, 2H), 4.47 (q, *J* = 7.1 Hz, 2H, CH<sub>2</sub> in Et), 4.43 (q, *J* = 7.1 Hz, 2H, CH<sub>2</sub> in Et), 1.38 (t, *J* = 7.1, 3H, CH<sub>3</sub> in Et), 1.36 (t, *J* = 7.1, 3H, CH<sub>3</sub> in Et).

<sup>13</sup>C NMR (101 MHz, CDCl<sub>3</sub>) δ 170.62, 170.39, 149.63, 149.17, 140.39, 136.33, 129.33, 126.84, 126.41, 124.94, 123.90, 122.25, 120.63, 120.47, 118.47, 110.00, 76.56, 65.83, 65.75, 14.40, 14.36.

<sup>19</sup>F NMR (376 MHz, CDCl<sub>3</sub>) δ -127.46 (dd, *J* = 54.4, 29.1 Hz).

<sup>11</sup>B NMR (128 MHz, CDCl<sub>3</sub>) δ 2.18.

HRMS (ESI) calcd for C<sub>28</sub>H<sub>24</sub>B<sub>2</sub>F<sub>4</sub>N<sub>3</sub>O<sub>4</sub><sup>+</sup> [M+H]<sup>+</sup> = 564.1884, found 564.1871.

## II-8. Preparation of ROS and RNS

The stock solution of  $\text{ClO}^-$  (2.0 mM) was prepared by diluting a NaClO aqueous solution (1.4 mol/L), and the concentration was determined from absorption at  $\lambda = 292 \text{ nm}$  ( $\epsilon = 350 \text{ M}^{-1} \text{ cm}^{-1}$ ). Hydrogen peroxide ( $\text{H}_2\text{O}_2$ ) was prepared by diluting a 30%  $\text{H}_2\text{O}_2$  solution, and the final concentration of  $\text{H}_2\text{O}_2$  was 100  $\mu\text{M}$ . *tert*-Butyl hydroperoxide (TBHP, 100  $\mu\text{M}$ ) was prepared in degassed deionized water. Hydroxyl radical ( $\bullet\text{OH}$ ) was generated *in situ* by a Fenton reaction:  $\text{FeCl}_2$  (100  $\mu\text{M}$ ) was added to 10 equiv. of  $\text{H}_2\text{O}_2$ , and the concentration of  $\bullet\text{OH}$  was estimated from the concentration of Fe (II). Nitric oxide (NO) was generated from SNP (Sodium Nitroferricyanide (III) Dihydrate), which was added into degassed deionized water under  $\text{N}_2$  and stirred for 30 min. Singlet oxygen ( $^1\text{O}_2$ ) was prepared by adding  $\text{NaMoO}_4$  to a solution of  $\text{H}_2\text{O}_2$  in PBS solution (pH 7.4, 10.0 mM).

## II-9. Preparation of 3e-SO from 3e and NaClO

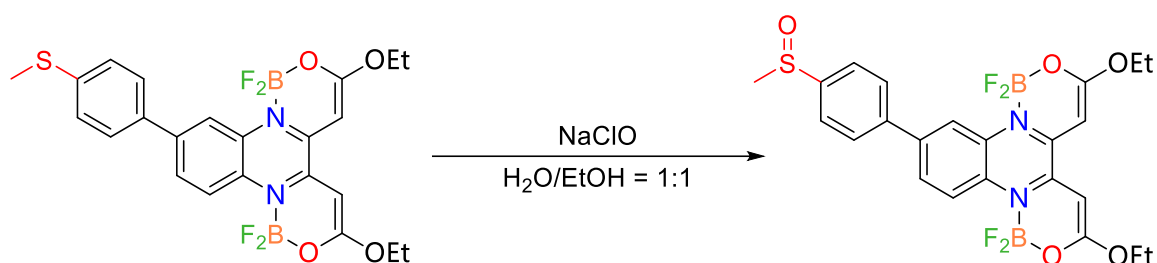

### 3,6-Diethoxy-1,1,8,8-tetrafluoro-11-(4-(methylsulfinyl)phenyl)-1,8-dihydro-1 $\lambda^4$ ,8 $\lambda^4$ ,9 $\lambda^4$ ,14 $\lambda^4$ -bis([1,3,2]oxazaborinino)[3,4-*a*:4',3'-*c*]quinoxaline (3e-SO)

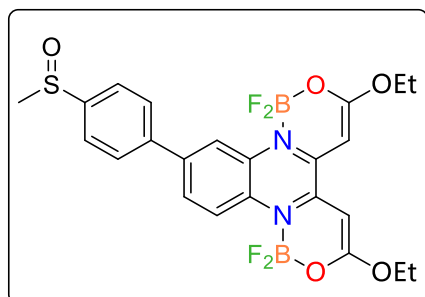

$^1\text{H NMR}$  (400 MHz,  $\text{CDCl}_3$ )  $\delta$  8.29 (s, 1H), 8.14 (d,  $J = 7.8 \text{ Hz}$ , 1H), 7.80 – 7.62 (m 4H), 7.52 (d,  $J = 8.4 \text{ Hz}$ , 1H), 5.43 (s, 2H), 4.46 (q,  $J = 7.2 \text{ Hz}$ , 4H), 2.70 (s, 3H), 1.38 (t,  $J = 6.5 \text{ Hz}$ , 6H).

$^{13}\text{C NMR}$  (101 MHz,  $\text{CDCl}_3$ )  $\delta$  170.40, 149.63, 149.23, 145.38, 142.52, 138.27, 128.70, 128.26, 128.13, 125.86, 124.30, 121.47, 119.25, 76.69, 65.71, 44.23, 14.37.

$^{19}\text{F NMR}$  (376 MHz,  $\text{CDCl}_3$ )  $\delta$  -127.22 (d,  $J = 25.6 \text{ Hz}$ ), -127.47 (d,  $J = 24.4 \text{ Hz}$ ).

$^{11}\text{B NMR}$  (128 MHz,  $\text{CDCl}_3$ )  $\delta$  2.20.

**HRMS** (ESI) calcd for  $\text{C}_{23}\text{H}_{24}\text{B}_2\text{F}_4\text{N}_2\text{O}_5\text{S}^+$   $[\text{M}+\text{H}]^+ = 537.1444$ , found 537.1449.

**Table S1.** Optimization of boron coordinated reactions.<sup>a</sup>

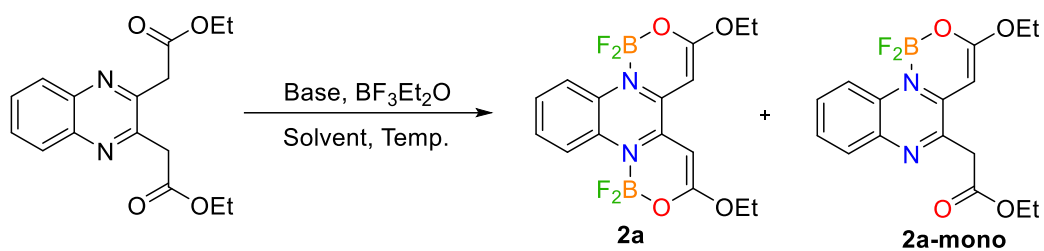

| Entry | Solvent | Base           | Temp. | Result                    |
|-------|---------|----------------|-------|---------------------------|
| 1     | DCM     | $\text{NEt}_3$ | 25°C  | <b>2-mono</b> , 86% yield |
| 2     | Toluene | $\text{NEt}_3$ | 80°C  | <b>2</b> , 77% yield      |
| 3     | Toluene | HMDS           | 80°C  | <b>2</b> , 83% yield      |
| 4     | Toluene | HMDS           | 110°C | <b>2</b> , 78% yield      |

<sup>a</sup> Reaction conditions: Base (3 equiv.),  $\text{BF}_3\cdot\text{Et}_2\text{O}$  (5 equiv.) in solvent for 4 hours.

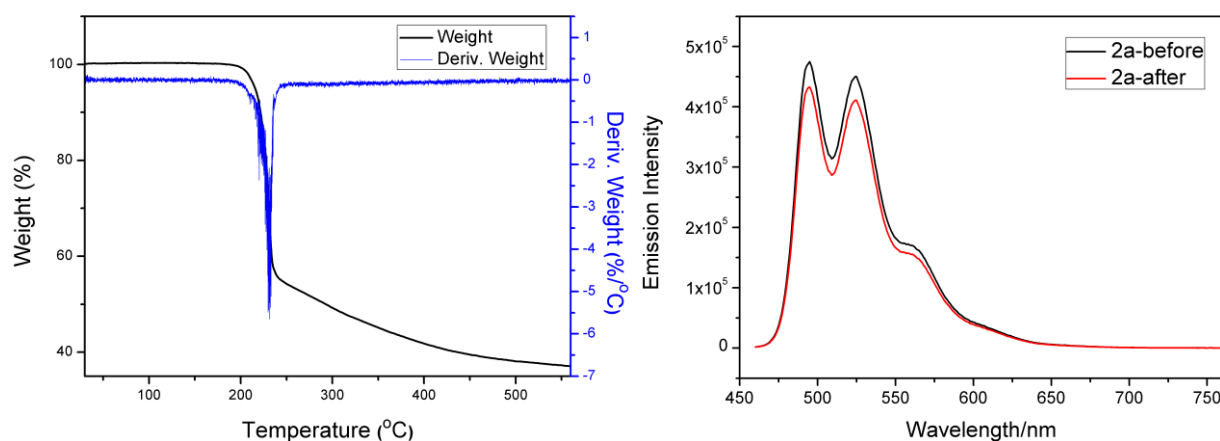

**Fig. S1** TGA curves and derivative weight of **2a** (left) and photostability of **2a** under continuous irradiation with a 500W Xe lamp over 20 minutes (right).

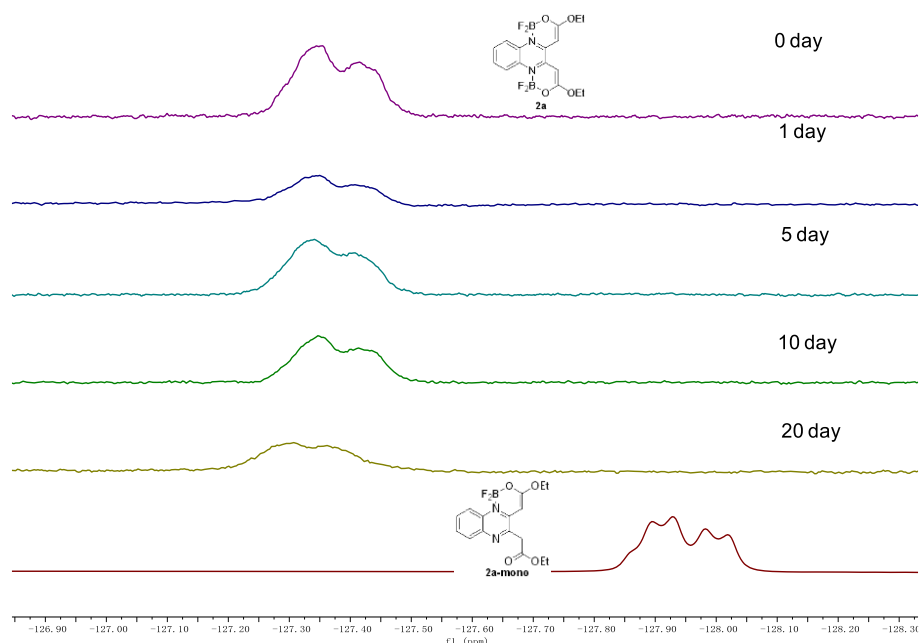

**Fig. S2**  $^{19}\text{F}$  NMR of **2a** in  $\text{CDCl}_3$  for different times compared with **2a-mono**. Notice: **2a-mono** is unstable in solution and has deteriorated in  $\text{CDCl}_3$  for 12 hours.

**Table S2** Optimization of Suzuki-Coupling reactions.<sup>a</sup>

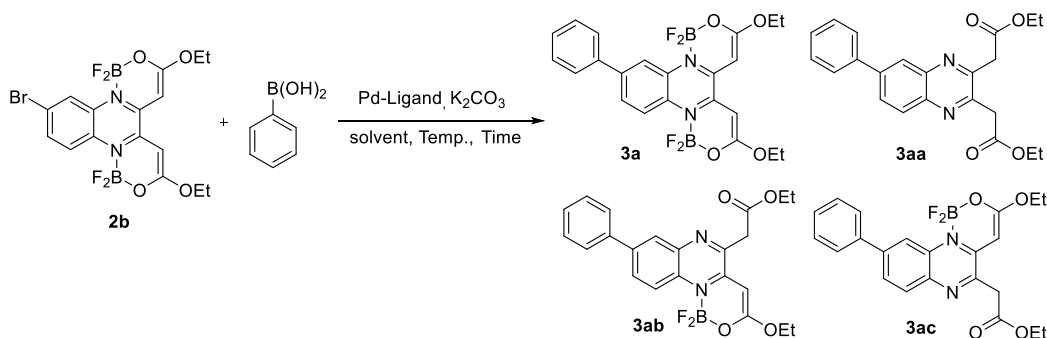

| Entry | Pd catalyst/ligand                     | Solvent                       | Temp.               | Yield (%)                              |
|-------|----------------------------------------|-------------------------------|---------------------|----------------------------------------|
| 1     | $\text{Pd}(\text{PPh}_3)\text{Cl}_2$   | Dioxane: $\text{H}_2\text{O}$ | $100^\circ\text{C}$ | <b>3aa</b> , 75%                       |
| 2     | $\text{Pd}(\text{PPh}_3)\text{Cl}_2$   | Dioxane: $\text{H}_2\text{O}$ | $70^\circ\text{C}$  | <b>3aa</b> , 82%                       |
| 3     | $\text{Pd}(\text{PPh}_3)\text{Cl}_2$   | THF                           | $70^\circ\text{C}$  | <b>3ab+3ac</b> , 45%                   |
| 4     | $\text{Pd}(\text{PPh}_3)\text{Cl}_2$   | THF                           | $50^\circ\text{C}$  | <b>3ab+3ac</b> , 73%                   |
| 5     | $\text{Pd}(\text{OAc})_2/\text{XPhos}$ | Toluene                       | r.t.                | <b>3a</b> , 66%                        |
| 6     | $\text{Pd}(\text{OAc})_2/\text{XPhos}$ | Toluene                       | $70^\circ\text{C}$  | <b>3a</b> 73% & ( <b>3ab+3ac</b> ) 18% |
| 7     | $\text{Pd}(\text{OAc})_2/\text{XPhos}$ | Toluene                       | $70^\circ\text{C}$  | <b>3a</b> , 86%                        |

<sup>a</sup> **2b** (0.3 mmol), phenylboronic acid (2.0 equiv.), Pd catalyst (5 mol%), ligand (10 mol%),  $\text{K}_2\text{CO}_3$  (3.0 equiv.), solvent (1 mL), 10 h.

### III. Crystallographic and structural refinement data

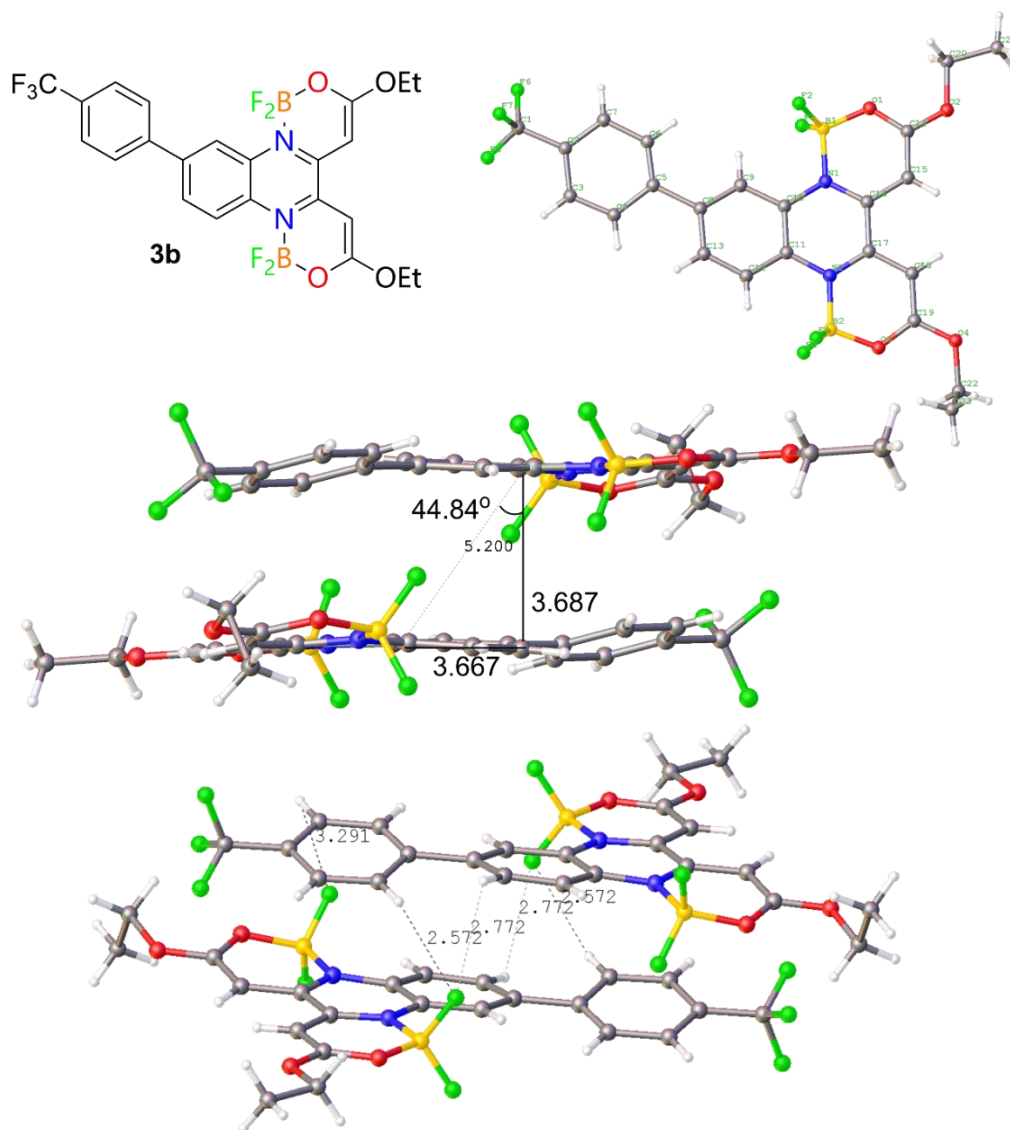

**Fig. S3** Crystal-packing pattern of **3b** between the adjacent interlayered crystals from side view. Interlayer distance is  $3.687 \text{ \AA}$  and the corresponding slip angle of  $44.84^\circ$  for coplanar inclined arrangements of its transition dipole. H, light gray; C, gray; N, blue; O, red; F, green; B, yellow.

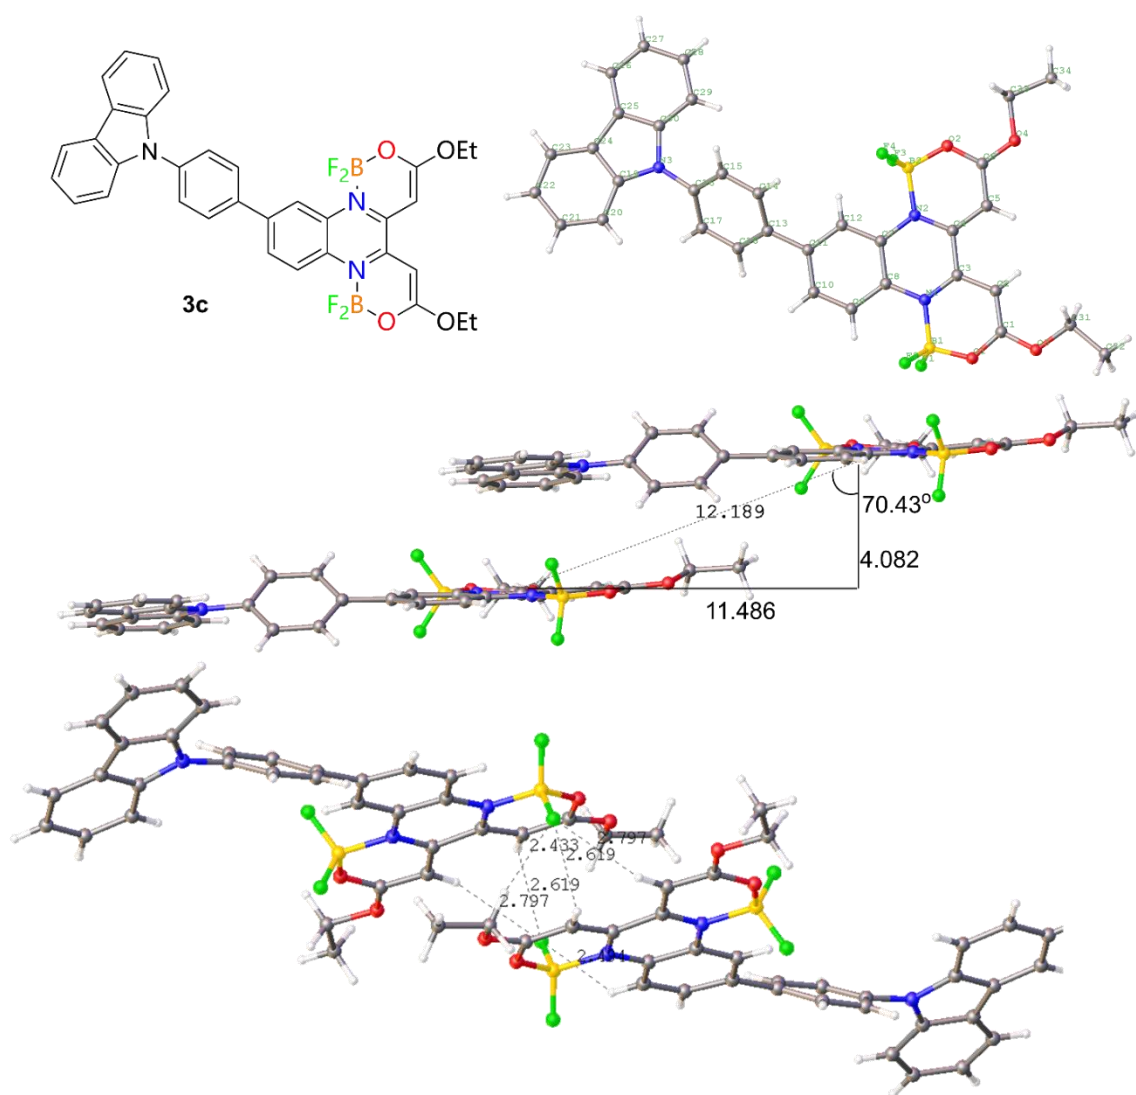

**Fig. S4** Crystal-packing pattern of **3c** between the adjacent interlayered crystals from side view. Interlayer distance is 4.082 Å and the corresponding slip angle of 70.43° for coplanar inclined arrangements of its transition dipole. H, light gray; C, gray; N, blue; O, red; F, green; B, yellow.

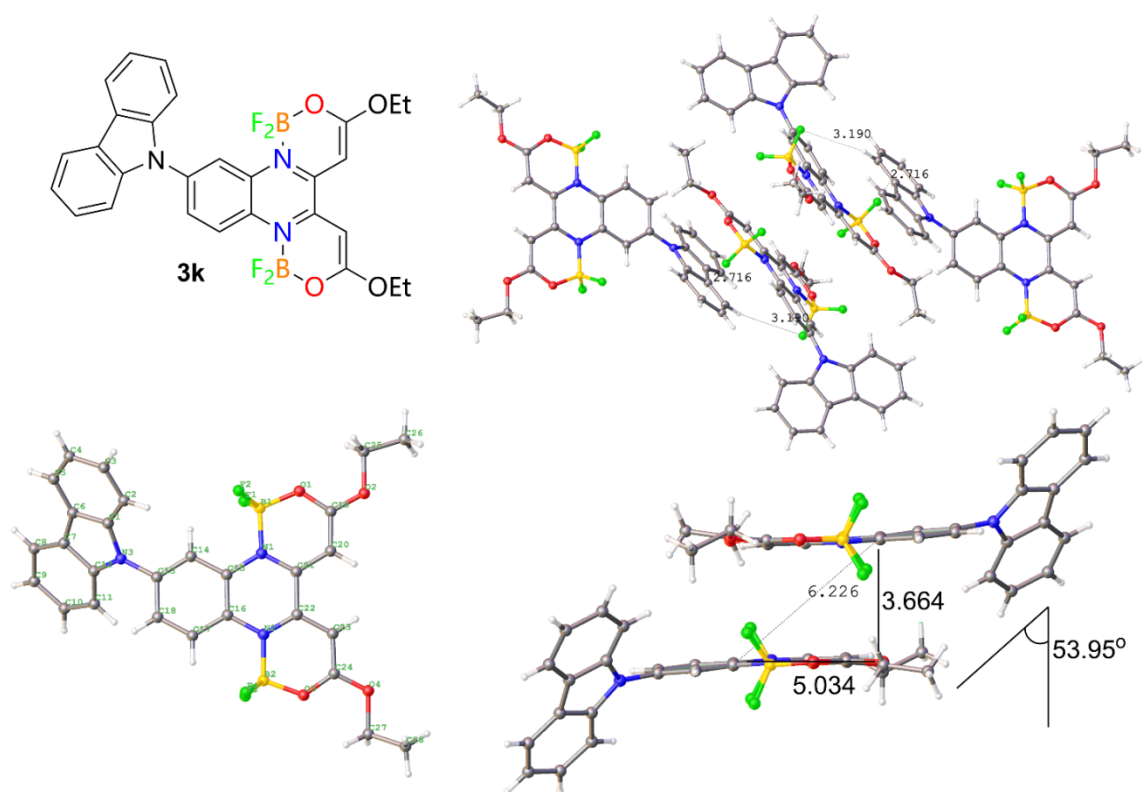

**Fig. S5** Crystal-packing pattern of **3k** between the adjacent interlayered crystals from side view. Interlayer distance is 3.664 Å and the corresponding slip angle of 53.95° for coplanar inclined arrangements of its transition dipole. H, light gray; C, gray; N, blue; O, red; F, green; B, yellow.



**Table S3** Crystal data and structure refinements for **3b** obtained from crystallography.

| Identification code                         | <b>3b</b>                                                                                   |
|---------------------------------------------|---------------------------------------------------------------------------------------------|
| CCDC No.                                    | 2329222                                                                                     |
| Empirical formula                           | C <sub>23</sub> H <sub>19</sub> B <sub>2</sub> F <sub>7</sub> N <sub>2</sub> O <sub>4</sub> |
| Formula weight                              | 542.02                                                                                      |
| Temperature/K                               | 118.25(10)                                                                                  |
| Crystal system                              | monoclinic                                                                                  |
| Space group                                 | P2 <sub>1</sub> /c                                                                          |
| a/Å                                         | 8.7996(5)                                                                                   |
| b/Å                                         | 27.3747(14)                                                                                 |
| c/Å                                         | 9.3692(5)                                                                                   |
| α/°                                         | 90.00                                                                                       |
| β/°                                         | 92.549(5)                                                                                   |
| γ/°                                         | 90.00                                                                                       |
| Volume/Å <sup>3</sup>                       | 2254.7(2)                                                                                   |
| Z                                           | 4                                                                                           |
| ρ <sub>calc</sub> /cm <sup>3</sup>          | 1.597                                                                                       |
| μ/mm <sup>-1</sup>                          | 0.145                                                                                       |
| F(000)                                      | 1104.0                                                                                      |
| Crystal size/mm <sup>3</sup>                | 0.35 × 0.26 × 0.14                                                                          |
| Radiation                                   | Mo Kα (λ = 0.71073)                                                                         |
| 2θ range for data collection/°              | 6.24 to 52                                                                                  |
| Index ranges                                | -10 ≤ h ≤ 10, -33 ≤ k ≤ 30, -11 ≤ l ≤ 8                                                     |
| Reflections collected                       | 9269                                                                                        |
| Independent reflections                     | 4304 [R <sub>int</sub> = 0.0409, R <sub>sigma</sub> = 0.0659]                               |
| Data/restraints/parameters                  | 4304/12/345                                                                                 |
| Goodness-of-fit on F <sup>2</sup>           | 1.035                                                                                       |
| Final R indexes [I ≥ 2σ (I)]                | R <sub>1</sub> = 0.0632, wR <sub>2</sub> = 0.1332                                           |
| Final R indexes [all data]                  | R <sub>1</sub> = 0.0876, wR <sub>2</sub> = 0.1483                                           |
| Largest diff. peak/hole / e Å <sup>-3</sup> | 0.99/-0.28                                                                                  |

**Table S4** Crystal data and structure refinements for **3c** obtained from crystallography.

| Compound                                    | <b>3c</b>                                                                                   |
|---------------------------------------------|---------------------------------------------------------------------------------------------|
| CCDC No.                                    | 2329220                                                                                     |
| Empirical formula                           | C <sub>34</sub> H <sub>27</sub> B <sub>2</sub> F <sub>4</sub> N <sub>3</sub> O <sub>4</sub> |
| Formula weight                              | 724.185                                                                                     |
| Temperature/K                               | 115(4)                                                                                      |
| Crystal system                              | triclinic                                                                                   |
| Space group                                 | P-1                                                                                         |
| a/Å                                         | 11.4676(7)                                                                                  |
| b/Å                                         | 12.1893(8)                                                                                  |
| c/Å                                         | 13.0225(8)                                                                                  |
| $\alpha$ /°                                 | 102.544(5)                                                                                  |
| $\beta$ /°                                  | 105.810(5)                                                                                  |
| $\gamma$ /°                                 | 104.715(5)                                                                                  |
| Volume/Å <sup>3</sup>                       | 1611.8(2)                                                                                   |
| Z                                           | 2                                                                                           |
| $\rho_{\text{calc}}$ /cm <sup>3</sup>       | 1.492                                                                                       |
| $\mu$ /mm <sup>-1</sup>                     | 0.271                                                                                       |
| F(000)                                      | 745.0                                                                                       |
| Crystal size/mm <sup>3</sup>                | 0.4 × 0.36 × 0.21                                                                           |
| Radiation                                   | Mo K $\alpha$ ( $\lambda$ = 0.71073)                                                        |
| 2 $\Theta$ range for data collection/°      | 6.16 to 52                                                                                  |
| Index ranges                                | -15 ≤ h ≤ 14, -15 ≤ k ≤ 15, -17 ≤ l ≤ 16                                                    |
| Reflections collected                       | 13055                                                                                       |
| Independent reflections                     | 6201 [R <sub>int</sub> = 0.0351, R <sub>sigma</sub> = 0.0601]                               |
| Data/restraints/parameters                  | 6201/0/453                                                                                  |
| Goodness-of-fit on F <sup>2</sup>           | 1.048                                                                                       |
| Final R indexes [I >= 2 $\sigma$ (I)]       | R <sub>1</sub> = 0.0584, wR <sub>2</sub> = 0.1255                                           |
| Final R indexes [all data]                  | R <sub>1</sub> = 0.0778, wR <sub>2</sub> = 0.1412                                           |
| Largest diff. peak/hole / e Å <sup>-3</sup> | 1.38/-1.27                                                                                  |

**Table S5** Crystal data and structure refinements for **3k** obtained from crystallography.

| Identification code                         | <b>3k</b>                                                                                   |
|---------------------------------------------|---------------------------------------------------------------------------------------------|
| CCDC No.                                    | 2329221                                                                                     |
| Empirical formula                           | C <sub>28</sub> H <sub>23</sub> B <sub>2</sub> F <sub>4</sub> N <sub>3</sub> O <sub>4</sub> |
| Formula weight                              | 563.11                                                                                      |
| Temperature/K                               | 118.15(10)                                                                                  |
| Crystal system                              | monoclinic                                                                                  |
| Space group                                 | P2 <sub>1</sub> /c                                                                          |
| a/Å                                         | 11.4139(5)                                                                                  |
| b/Å                                         | 11.676(2)                                                                                   |
| c/Å                                         | 19.1275(8)                                                                                  |
| α/°                                         | 90.00                                                                                       |
| β/°                                         | 94.138(4)                                                                                   |
| γ/°                                         | 90.00                                                                                       |
| Volume/Å <sup>3</sup>                       | 2542.5(5)                                                                                   |
| Z                                           | 4                                                                                           |
| ρ <sub>calc</sub> /cm <sup>3</sup>          | 1.471                                                                                       |
| μ/mm <sup>-1</sup>                          | 0.117                                                                                       |
| F(000)                                      | 1160.0                                                                                      |
| Crystal size/mm <sup>3</sup>                | 0.35 × 0.33 × 0.33                                                                          |
| Radiation                                   | Mo Kα (λ = 0.71073)                                                                         |
| 2θ range for data collection/°              | 6.4 to 52                                                                                   |
| Index ranges                                | -12 ≤ h ≤ 13, -13 ≤ k ≤ 11, -17 ≤ l ≤ 23                                                    |
| Reflections collected                       | 10584                                                                                       |
| Independent reflections                     | 4850 [R <sub>int</sub> = 0.0370, R <sub>sigma</sub> = 0.0607]                               |
| Data/restraints/parameters                  | 4850/0/374                                                                                  |
| Goodness-of-fit on F <sup>2</sup>           | 1.030                                                                                       |
| Final R indexes [I ≥ 2σ (I)]                | R <sub>1</sub> = 0.0484, wR <sub>2</sub> = 0.0945                                           |
| Final R indexes [all data]                  | R <sub>1</sub> = 0.0728, wR <sub>2</sub> = 0.1087                                           |
| Largest diff. peak/hole / e Å <sup>-3</sup> | 0.20/-0.26                                                                                  |

**Table S6** Selected bond lengths [ $\text{\AA}$ ] and dihedral angles [deg] of **3b**, **3c** and **3k** obtained from crystallography.

| Details \ Compounds                 | <b>3b</b>           | <b>3c</b>         | <b>3k</b>           |
|-------------------------------------|---------------------|-------------------|---------------------|
| O1-B1 distance [ $\text{\AA}$ ]     | 1.476(4)            | 1.465(4)          | 1.483(3)            |
| N1-B1 distance [ $\text{\AA}$ ]     | 1.583(4)            | 1.580(3)          | 1.580(3)            |
| O3-B2 distance [ $\text{\AA}$ ]     | 1.488(4)            | 1.483(3)          | 1.469(3)            |
| N2-B2 distance [ $\text{\AA}$ ]     | 1.576(4)            | 1.585(3)          | 1.587(3)            |
| C(X)-C(Y) distance [ $\text{\AA}$ ] | C14-C15<br>1.385(4) | C1-C2<br>1.374(4) | C19-C20<br>1.379(3) |
|                                     | C15-C16<br>1.381(4) | C2-C3<br>1.398(4) | C20-C21<br>1.380(3) |
|                                     | C17-C18<br>1.400(4) | C4-C5<br>1.387(4) | C22-C23<br>1.390(3) |
|                                     | C18-C19<br>1.372(5) | C5-C6<br>1.390(3) | C23-C24<br>1.378(3) |
| C(X)-O(Y) distance [ $\text{\AA}$ ] | O1-C14<br>1.287(4)  | O1-C1<br>1.294(3) | O1-C19<br>1.289(2)  |
|                                     | O3-C19<br>1.290(4)  | O2-C6<br>1.285(3) | O3-C24<br>1.290(3)  |
| slip angles [deg]                   | 44.84               | 70.40             | 53.95               |

#### IV. Photophysical properties of quinoxaline-based bis-boron complexes

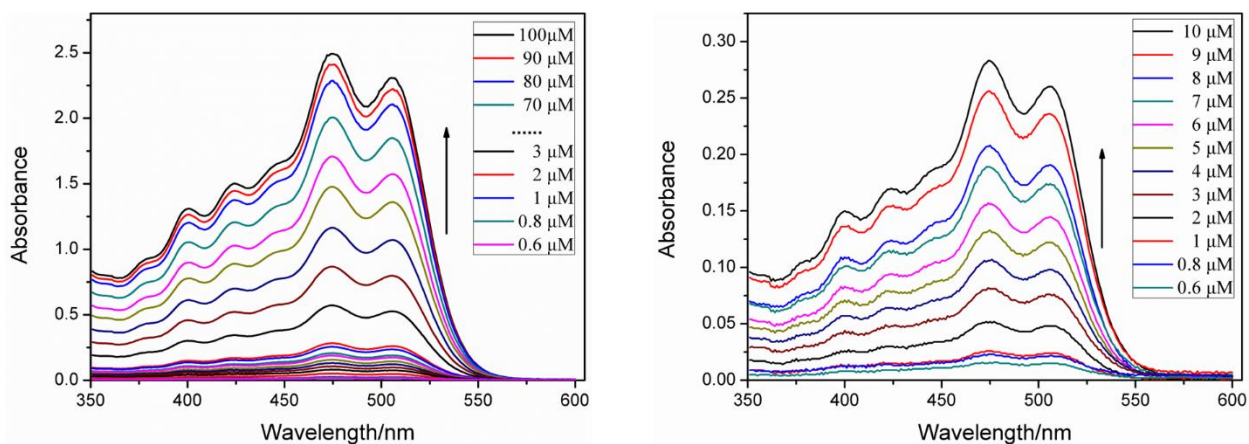

**Fig. S6** Concentration-dependent UV-vis absorption of **3e** in  $\text{CH}_2\text{Cl}_2$  at room temperature.

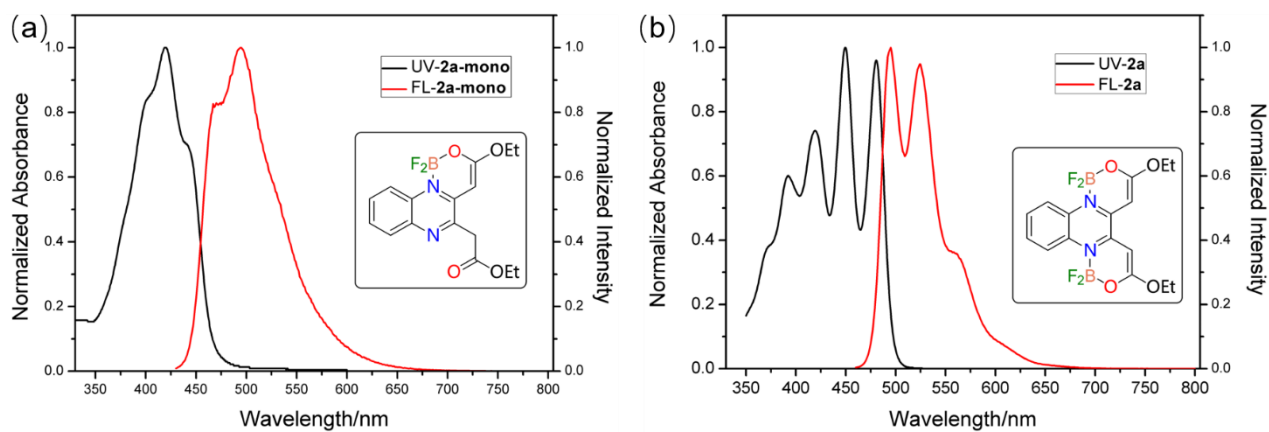

**Fig. S7** Normalized absorption and emission spectra of **2a** & **2a-mono** in DCM.

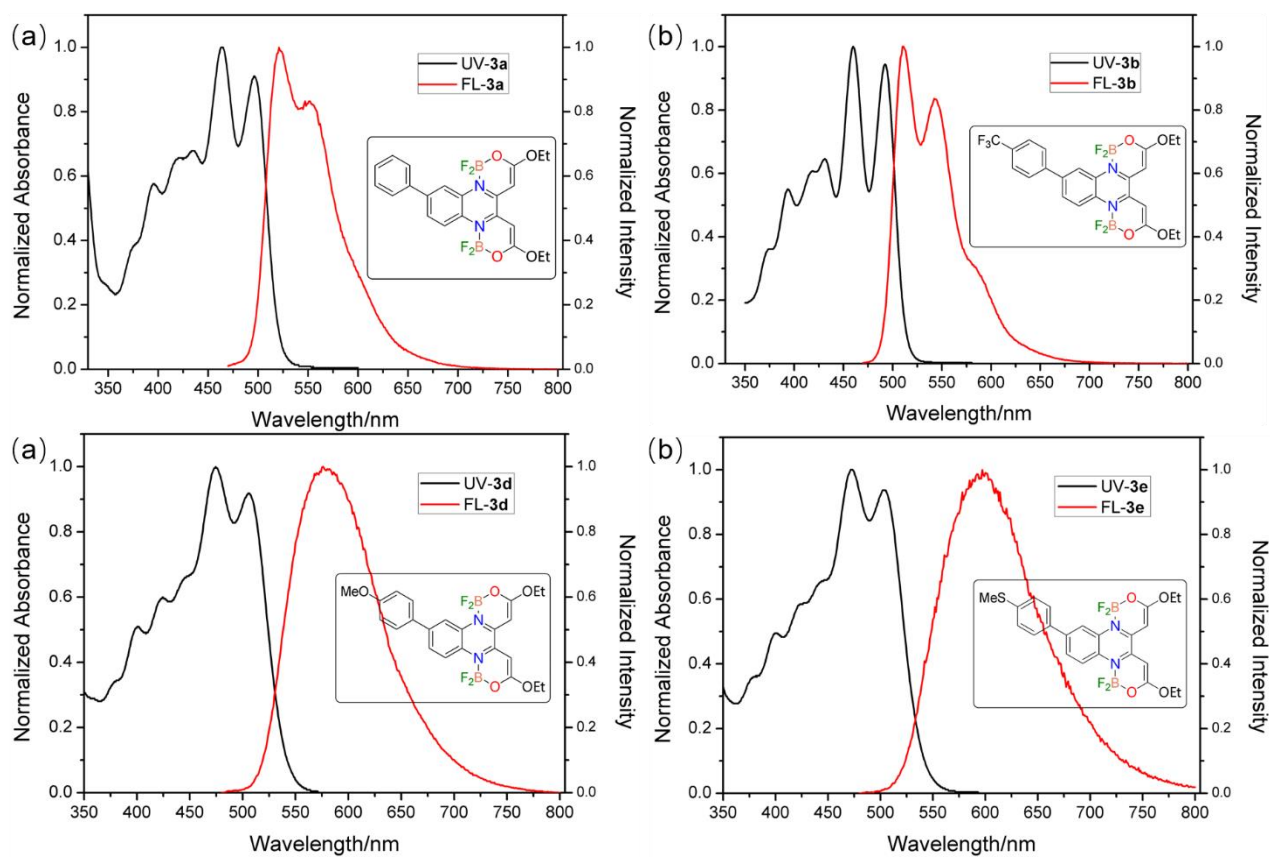

**Fig. S8** Normalized absorption and emission spectra of **3a-3b** & **3d-3e** in DCM.

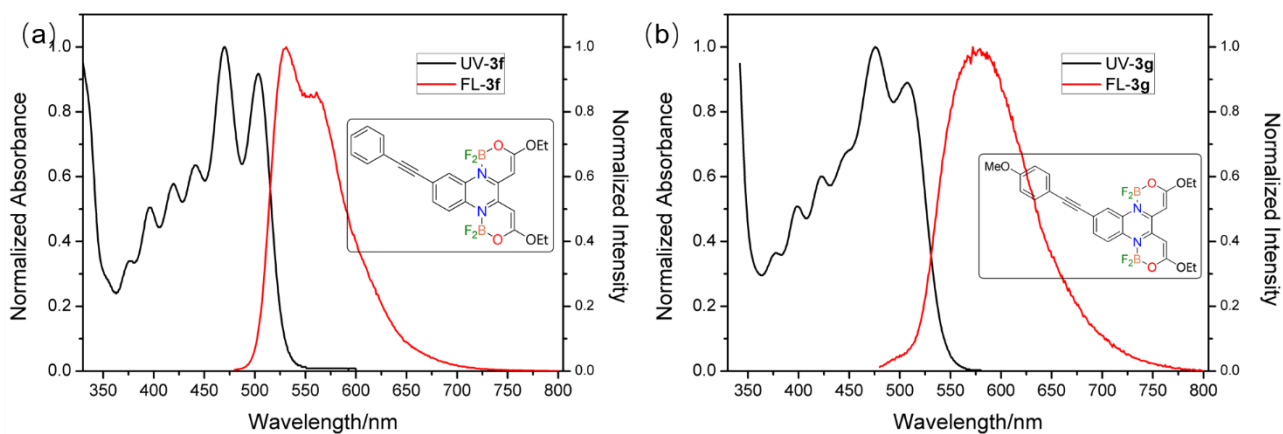

**Fig. S9** Normalized absorption and emission spectra of **3f-3g** in DCM.

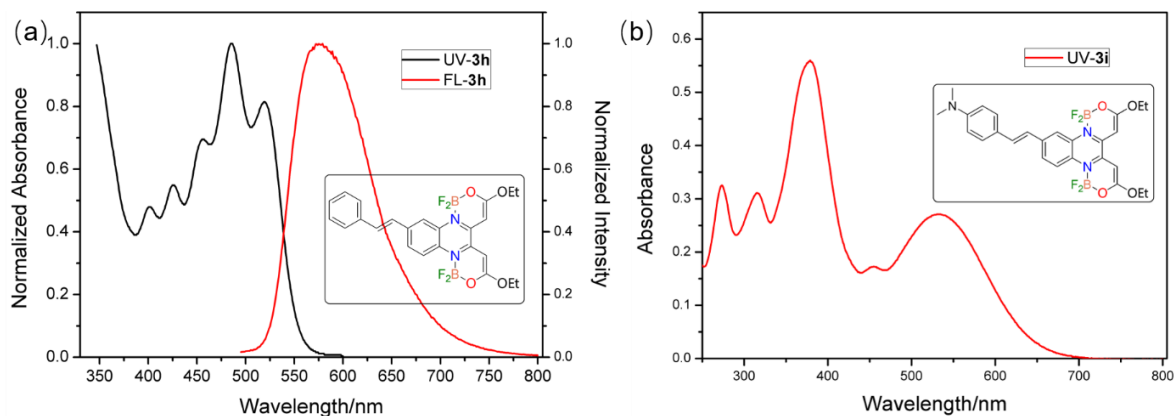

**Fig. S10** Normalized absorption and emission spectra of **3h** in DCM and **3i** in toluene.

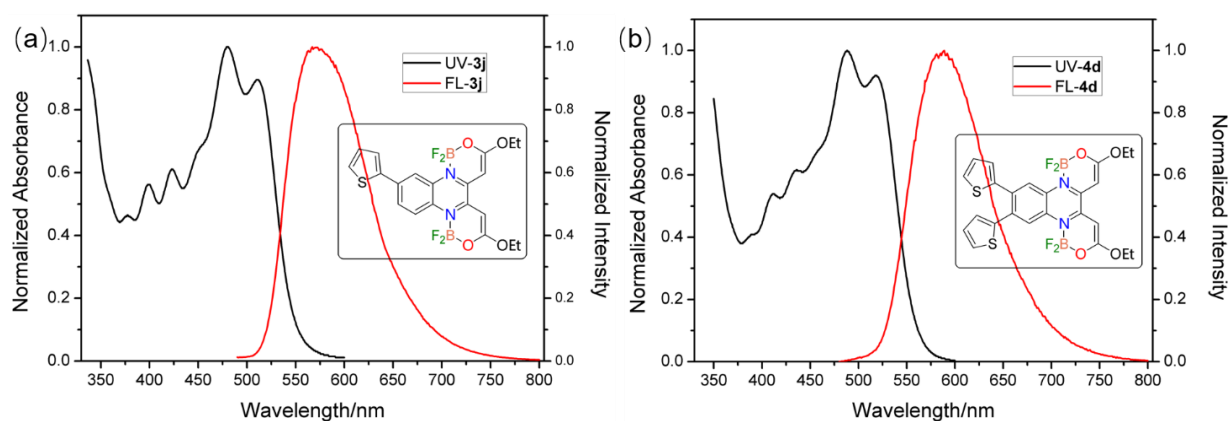

**Fig. S11** Normalized absorption and emission spectra of **3j** & **4d** in DCM.

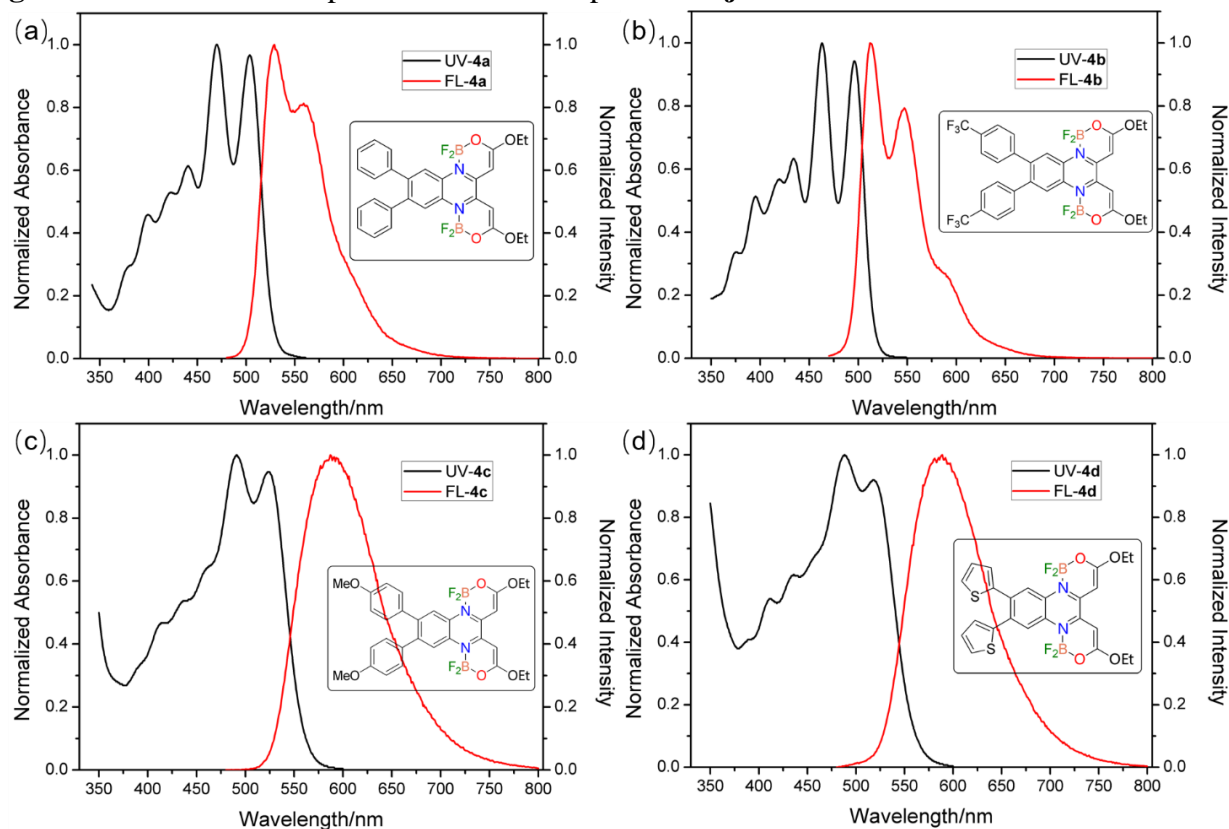

**Fig. S12** Normalized absorption and emission spectra of **4a-d** in DCM.

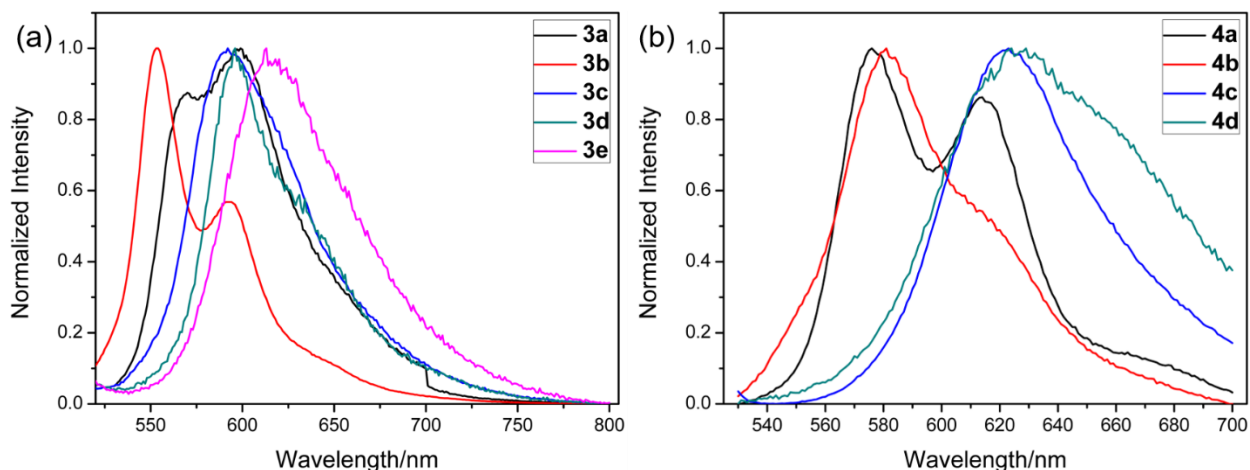

**Fig. S13** Normalized emission spectra of **3a-3e** (a) and **4a-4d** (b) in powder state.

**Table S7.** Photophysical properties of selected compounds **3a-3e** and **4a-4d** in dichloromethane and solid powder.

| Entry     | Dichloromethane <sup>a</sup>                                                                |                                                           |                               |                                     | Powder                     |                                    |
|-----------|---------------------------------------------------------------------------------------------|-----------------------------------------------------------|-------------------------------|-------------------------------------|----------------------------|------------------------------------|
|           | $\lambda_{\text{abs}}^{\text{max}}/\text{nm}$ ( $\log \epsilon_{\text{max}}$ ) <sup>b</sup> | $\lambda_{\text{em}}^{\text{max}}/\text{nm}$ <sup>b</sup> | Stokes shift <sup>c</sup> /nm | $\Phi_{\text{f}}$ <sup>d,e</sup> /% | $\lambda_{\text{em}}$ (nm) | $\Phi_{\text{f}}$ <sup>e</sup> (%) |
| <b>3a</b> | 465 (4.63), 496 (4.61)                                                                      | 521, 552                                                  | 56                            | 61                                  | 570, 599                   | 26                                 |
| <b>3b</b> | 460 (4.54), 493 (4.51)                                                                      | 510, 542                                                  | 50                            | 48                                  | 553, 593                   | 32                                 |
| <b>3c</b> | 473 (4.32), 506 (4.28)                                                                      | 561                                                       | 88                            | 79                                  | 592                        | 41                                 |
| <b>3d</b> | 475 (4.52), 506 (4.48)                                                                      | 578                                                       | 103                           | 88                                  | 596                        | 36                                 |
| <b>3e</b> | 472 (4.59), 503 (4.53)                                                                      | 600                                                       | 128                           | 81                                  | 613                        | 33                                 |
| <b>4a</b> | 470 (4.21), 504 (4.49)                                                                      | 528, 569                                                  | 58                            | 52                                  | 576, 614                   | 37                                 |
| <b>4b</b> | 462 (4.43), 495 (4.41)                                                                      | 512, 547                                                  | 50                            | 48                                  | 581                        | 40                                 |
| <b>4c</b> | 483 (4.44), 515 (4.42)                                                                      | 590                                                       | 107                           | 91                                  | 623                        | 38                                 |
| <b>4d</b> | 480 (4.40), 509 (4.35)                                                                      | 586                                                       | 106                           | 79                                  | 624                        | 43                                 |

<sup>a</sup> The spectra were recorded in  $\text{CH}_2\text{Cl}_2$  ( $c = 1.0 \times 10^{-5}$  M) at room temperature. <sup>b</sup> Data correspond to the strongest absorption/emission peaks. <sup>c</sup> Energy gap between the absorption and emission maxima in  $\text{CH}_2\text{Cl}_2$  solution. <sup>d</sup> In toluene. <sup>e</sup> Absolute quantum yield determined by a calibrated integrating sphere system.



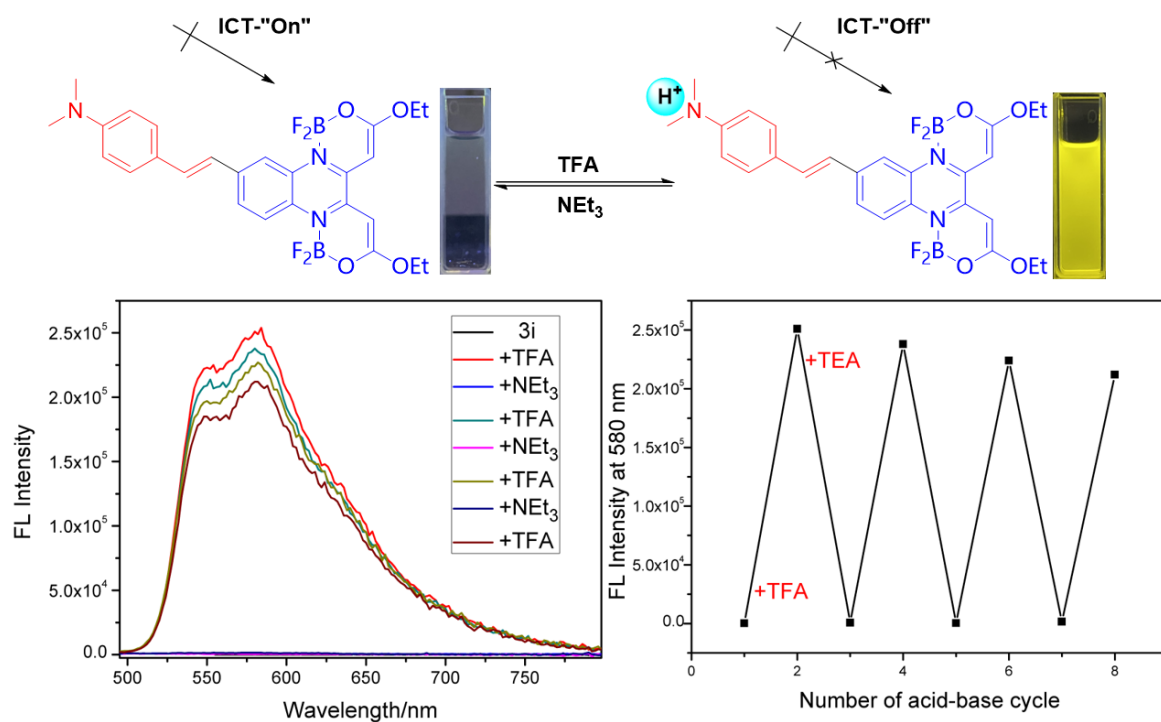

**Fig. S14** (a) Mechanism of **3i** as a "turn-on" pH sensor. (b) Emission spectra of initial, TFA and  $\text{NEt}_3$  additive of **3i**. (c) Reversible switching of the emission of **3i** by the TFA- $\text{NEt}_3$  additive cycle. Insets: photos of **3i** in DCM irradiated at 365 nm.

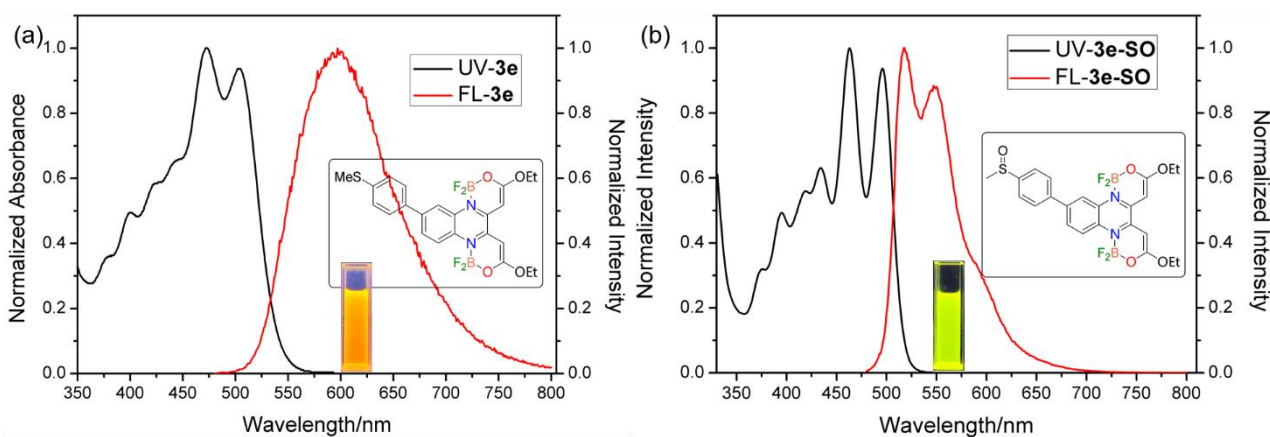

**Fig. S15** Normalized absorption and emission spectra of **3e** (left) and **3e-SO** (right) in DCM. Insets: photos of **3e** and **3e-SO** in DCM irradiated at 365 nm.

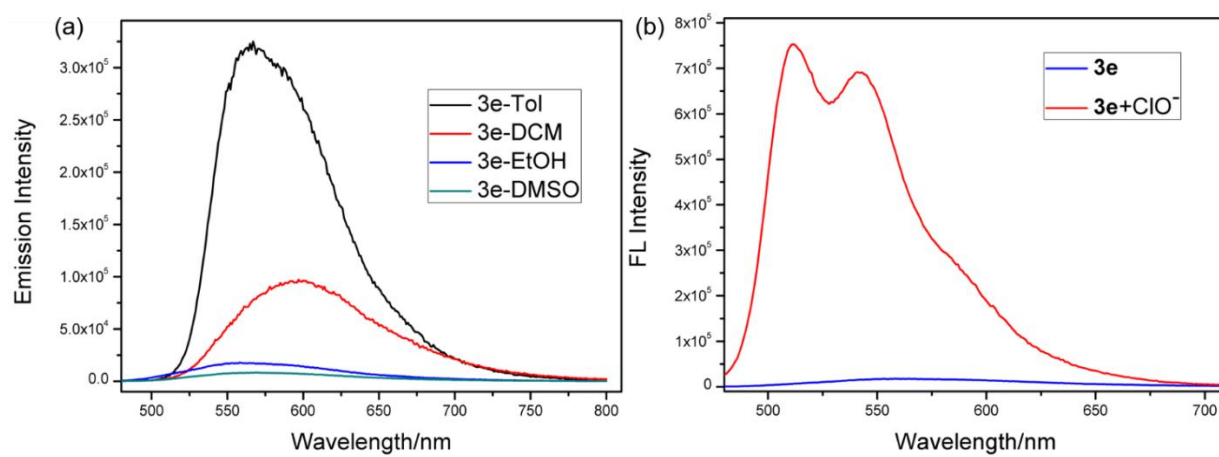

**Fig. S16** (a) Emission intensity of **3e** in different solvents and (b) Emission of **3e** compared with  $\text{ClO}^-$  additive in EtOH. (Concentration:  $1 \times 10^{-5}$  mol/L)

## V. Electrochemical studies

The redox potentials of **2a** and **3a-3c** were measured by cyclic voltammetry in dichloromethane containing tetrabutylammonium hexafluorophosphate  $[(n\text{-Bu})_4\text{N}][\text{PF}_6]$  (0.1 M) as a supporting electrolyte, purged with argon prior to conduct the experiments. All compounds exhibited one or two reversible oxidations and reductions. The redox potentials as well as the experimental HOMO and LUMO energy levels determined by the first oxidation and reduction potentials.

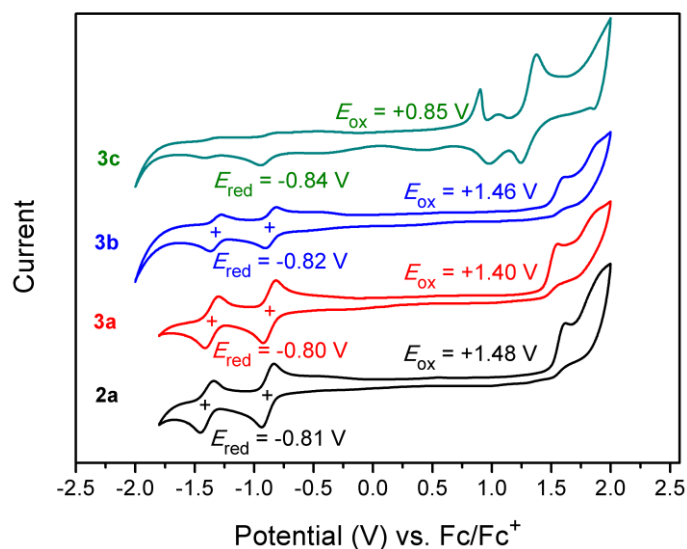

**Fig. S17** Cyclic voltammograms of **2a** and **3a-3c** in  $\text{CH}_2\text{Cl}_2$  (1 mM), measured with  $[(n\text{-Bu})_4\text{N}][\text{PF}_6]$  as a supporting electrolyte at a scan rate of  $100 \text{ mV}\cdot\text{s}^{-1}$ .

**Table S8** Electrochemical data of complexes **2a** and **3a-c**.<sup>a</sup>

| Compounds | $E_{\text{ox}}$ onset (V) | $E_{\text{red}}$ onset (V) | $E_{\text{HOMO}}$ (eV) | $E_{\text{LUMO}}$ (eV) |
|-----------|---------------------------|----------------------------|------------------------|------------------------|
| <b>2a</b> | 1.48                      | -0.81                      | -5.82                  | -3.45                  |
| <b>3a</b> | 1.40                      | -0.80                      | -5.74                  | -3.54                  |
| <b>3b</b> | 1.46                      | -0.82                      | -5.80                  | -3.52                  |
| <b>3c</b> | 0.85                      | -0.84                      | -5.19                  | -3.49                  |

<sup>a</sup> Potentials are given against ferrocene/ferrocenium ( $\text{Fc}/\text{Fc}^+$ ).

## VI. DFT calculations

All calculations were performed using the B3LYP-D3(BJ)/6-31G(d) level of theory with the Polarizable Continuum Model (PCM) solvent model for dichloromethane, utilizing the Gaussian 09 software package. Ground state geometries were optimized using the Berny Optimization Algorithm, and Time-Dependent Density Functional Theory (TD-DFT) calculations were carried out based on the optimized ground state geometries to obtain excited state properties. The corresponding command lines are “opt=calcfc b3lyp/6-31G(d) em=gd3bj scrf=(solvent=Dichloromethane)” for ground state optimization, and “td=(50-50, nstates=3) b3lyp/6-31G(d) em=gd3bj scrf=(solvent=Dichloromethane)” for TDDFT calculations.

**Table S9** Frontier orbital energy calculated by B3LYP-D3(BJ)/6-31G(d) based on optimized ground state geometries.

| Compounds | Energy (eV) |          |          |          |
|-----------|-------------|----------|----------|----------|
|           | HOMO-1      | HOMO     | LUMO     | LUMO+1   |
| <b>2a</b> | -6.38499    | -5.8669  | -2.72107 | -1.19782 |
| <b>3a</b> | -6.34581    | -5.8171  | -2.81114 | -1.394   |
| <b>3b</b> | -6.53683    | -5.99071 | -2.93005 | -1.60244 |
| <b>3c</b> | -5.90608    | -5.42881 | -2.83182 | -1.45768 |

**Table S10** Selected excited state energies (eV) and oscillator strengths calculated by TD-B3LYP-D3(BJ)/6-31G(d).

| Compounds | Electronic Transitions <sup>a</sup> | Energy (eV) | Wavelength (nm) | f <sup>b</sup> | CI <sup>c</sup> | Composition   |
|-----------|-------------------------------------|-------------|-----------------|----------------|-----------------|---------------|
| <b>2a</b> | S0→S1                               | 2.8184      | 439.9           | 0.3482         | 0.10763         | HOMO-1→LUMO+1 |
|           |                                     |             |                 |                | 0.70069         | HOMO→LUMO     |
|           | S0→S2                               | 3.1624      | 392.0           | 0.0773         | 0.70373         | HOMO-1→LUMO   |
|           | S0→S3                               | 3.9014      | 317.8           | 0.0000         | 0.56067         | HOMO-2→LUMO   |
| 0.42758   |                                     |             |                 |                | HOMO→LUMO+1     |               |
| <b>3a</b> | S0→S1                               | 2.6491      | 468.0           | 0.4905         | 0.10254         | HOMO-1→LUMO   |
|           |                                     |             |                 |                | 0.69504         | HOMO→LUMO     |
|           | S0→S2                               | 3.0456      | 407.1           | 0.0580         | 0.70088         | HOMO-1→LUMO   |
|           | S0→S3                               | 3.6736      | 337.5           | 0.0264         | 0.11995         | HOMO-4→LUMO   |
|           |                                     |             |                 |                | 0.67618         | HOMO-3→LUMO   |
|           |                                     |             |                 | 0.11544        | HOMO-2→LUMO+1   |               |

|           |       |        |       |        |             |             |
|-----------|-------|--------|-------|--------|-------------|-------------|
| <b>3b</b> | S0→S1 | 2.6999 | 459.2 | 0.5313 | 0.69526     | HOMO→LUMO   |
|           | S0→S2 | 3.1035 | 399.5 | 0.0507 | 0.70178     | HOMO-1→LUMO |
|           | S0→S3 | 3.757  | 330.0 | 0.0065 | 0.20009     | HOMO-4→LUMO |
|           |       |        |       |        | 0.61005     | HOMO-2→LUMO |
| 0.26927   |       |        |       |        | HOMO→LUMO+1 |             |
| <b>3c</b> | S0→S1 | 2.2962 | 539.9 | 0.1944 | 0.70549     | HOMO→LUMO   |
|           | S0→S2 | 2.7634 | 448.7 | 0.4212 | 0.70106     | HOMO-2→LUMO |
|           | S0→S3 | 2.8255 | 438.8 | 0.0000 | 0.70682     | HOMO-1→LUMO |

<sup>a</sup> Only presented with selected low-lying states. <sup>b</sup> Oscillator strength. <sup>c</sup> Configuration interaction coefficients, shown in absolute values.

Optimized geometries in Angstrom:

**2a**

SCF energy = -1479.3180001 Hartree

|   |             |             |             |
|---|-------------|-------------|-------------|
| C | -0.69785500 | -4.51462500 | 0.05513900  |
| C | -1.39251100 | -3.31833200 | 0.10294800  |
| C | -0.70476000 | -2.09155000 | 0.04317600  |
| C | 0.70478000  | -2.09154300 | -0.04335300 |
| C | 1.39254200  | -3.31831600 | -0.10319600 |
| C | 0.69789900  | -4.51461600 | -0.05541000 |
| H | -1.24485000 | -5.45069700 | 0.10159500  |
| H | -2.46754000 | -3.32964900 | 0.19123700  |
| H | 2.46756300  | -3.32961100 | -0.19157300 |
| H | 1.24490000  | -5.45068200 | -0.10191900 |
| C | 0.73936500  | 0.30011700  | -0.00311800 |
| C | -0.73936300 | 0.30010900  | 0.00307400  |
| N | -1.39958400 | -0.87382200 | 0.05152300  |
| N | 1.39959200  | -0.87380900 | -0.05160900 |
| B | -2.98739800 | -0.92201900 | 0.05410200  |
| B | 2.98740200  | -0.92199700 | -0.05390100 |
| C | 1.43160500  | 1.51525300  | 0.04359200  |
| H | 0.92888300  | 2.46306900  | 0.11414000  |
| C | -1.43161100 | 1.51524700  | -0.04356900 |
| H | -0.92889400 | 2.46306900  | -0.11408100 |

|   |             |             |             |
|---|-------------|-------------|-------------|
| C | -2.82023300 | 1.53099600  | -0.01341200 |
| C | 2.82022900  | 1.53101700  | 0.01340400  |
| O | 3.54357100  | 0.46277800  | -0.05751500 |
| O | -3.54357000 | 0.46274500  | 0.05743300  |
| F | 3.43194000  | -1.54804200 | -1.20148300 |
| F | 3.42721800  | -1.55184000 | 1.09241300  |
| F | -3.42744000 | -1.55210000 | -1.09199000 |
| F | -3.43171500 | -1.54774700 | 1.20192600  |
| O | 3.43924900  | 2.69488000  | 0.05262100  |
| O | -3.43927100 | 2.69485900  | -0.05265000 |
| C | 4.89829700  | 2.71019200  | 0.02922600  |
| H | 5.26146300  | 2.12779500  | 0.87955300  |
| H | 5.23167700  | 2.22735400  | -0.89268500 |
| C | 5.32220400  | 4.16092000  | 0.10363000  |
| H | 4.96488800  | 4.62524900  | 1.02759700  |
| H | 6.41508200  | 4.21787800  | 0.08728400  |
| H | 4.93310700  | 4.72584500  | -0.74871000 |
| C | -4.89832000 | 2.71016300  | -0.02923100 |
| H | -5.23167100 | 2.22749300  | 0.89277800  |
| H | -5.26151000 | 2.12761000  | -0.87944000 |
| C | -5.32224200 | 4.16087300  | -0.10388900 |
| H | -6.41511900 | 4.21782700  | -0.08747600 |
| H | -4.93308800 | 4.72596900  | 0.74831200  |
| H | -4.96499500 | 4.62502300  | -1.02797400 |

### 3a

SCF energy = -1710.4013158 Hartree

|   |             |             |             |
|---|-------------|-------------|-------------|
| C | 5.64628100  | -1.59109100 | -0.59623500 |
| C | 7.01357100  | -1.32923900 | -0.66281100 |
| C | 7.52435200  | -0.12816100 | -0.16632000 |
| C | 6.65622400  | 0.80920000  | 0.39792300  |
| C | 5.28923100  | 0.54781100  | 0.46542000  |
| O | -0.43784500 | 3.40418400  | -0.07188800 |
| C | -1.68719100 | 3.08387400  | 0.00502400  |

|   |             |             |             |
|---|-------------|-------------|-------------|
| C | -2.14063600 | 1.77079500  | 0.04410900  |
| O | -2.81910800 | -3.25698600 | 0.16424300  |
| C | -3.58629500 | -2.22837200 | -0.01012000 |
| C | -1.22913000 | 0.71053300  | -0.00041700 |
| C | -3.10151000 | -0.93110000 | -0.08742000 |
| C | -1.72234600 | -0.68215100 | 0.02172400  |
| C | 4.76261900  | -0.65621100 | -0.03220000 |
| N | -0.84307300 | -1.68979100 | 0.14632100  |
| N | 0.09918800  | 0.93795100  | -0.05370600 |
| C | 2.39069800  | 0.10708100  | -0.08926600 |
| C | 1.00966000  | -0.12481000 | -0.00217100 |
| C | 0.53399800  | -1.44394200 | 0.15731000  |
| C | 1.46423400  | -2.49140100 | 0.29343600  |
| C | 2.82047100  | -2.23673000 | 0.24060400  |
| C | 3.30973900  | -0.93050700 | 0.03682500  |
| B | -1.33839300 | -3.20535000 | 0.17886700  |
| F | -0.90746300 | -3.80080000 | 1.34885300  |
| F | -0.86096800 | -3.85129300 | -0.94396800 |
| B | 0.68101800  | 2.41680000  | -0.05387200 |
| F | 1.43110200  | 2.62518800  | -1.19485300 |
| F | 1.41259500  | 2.61791300  | 1.09830200  |
| O | -2.57393700 | 4.05886600  | 0.04101800  |
| C | -3.32043400 | 6.32634600  | 0.06368400  |
| C | -2.09665800 | 5.43807500  | 0.00852200  |
| O | -4.86131000 | -2.56910200 | -0.08865300 |
| C | -7.21356200 | -2.23754400 | -0.30389700 |
| C | -5.87081800 | -1.53997800 | -0.25964300 |
| H | 5.25699900  | -2.51698900 | -1.00866500 |
| H | 7.67960600  | -2.06127900 | -1.11045500 |
| H | 8.58993000  | 0.07538400  | -0.21783900 |
| H | 7.04479700  | 1.74265700  | 0.79480900  |
| H | 4.62495100  | 1.27092200  | 0.92896000  |
| H | -3.20101500 | 1.61578400  | 0.13536000  |
| H | -3.78717600 | -0.12153700 | -0.25153700 |

|   |             |             |             |
|---|-------------|-------------|-------------|
| H | 2.74705900  | 1.10499100  | -0.28831300 |
| H | 1.11839800  | -3.49984100 | 0.45915900  |
| H | 3.51528100  | -3.05797700 | 0.37871500  |
| H | -3.00538700 | 7.37425300  | 0.04077500  |
| H | -3.97523700 | 6.14266700  | -0.79332400 |
| H | -3.88656900 | 6.15489700  | 0.98405800  |
| H | -1.43332500 | 5.59147000  | 0.86324400  |
| H | -1.52204900 | 5.58029400  | -0.90993500 |
| H | -8.00434300 | -1.49209700 | -0.43265000 |
| H | -7.25813500 | -2.94008000 | -1.14109900 |
| H | -7.39781300 | -2.78335600 | 0.62594800  |
| H | -5.80285800 | -0.84324100 | 0.58175900  |
| H | -5.66382900 | -1.00092400 | -1.18950500 |

### 3b

SCF energy = -2047.442935 Hartree

|   |             |             |             |
|---|-------------|-------------|-------------|
| C | -4.28089700 | 0.57513500  | -0.55240500 |
| C | -5.64645000 | 0.83300500  | -0.50453600 |
| C | -6.51674200 | -0.12067800 | 0.02905000  |
| C | -6.01449000 | -1.33016600 | 0.51513100  |
| C | -4.64756500 | -1.58246400 | 0.46698900  |
| O | 1.41518000  | 3.44730800  | 0.09783500  |
| C | 2.66995300  | 3.14358300  | 0.00605600  |
| C | 3.12689000  | 1.83359500  | -0.04767800 |
| O | 3.83676400  | -3.19077800 | -0.15138400 |
| C | 4.59288800  | -2.16011500 | 0.05134000  |
| C | 2.21701900  | 0.76444400  | -0.00438100 |
| C | 4.09776600  | -0.86512300 | 0.12448700  |
| C | 2.72128900  | -0.62414300 | -0.01859000 |
| C | -3.75813100 | -0.63452000 | -0.06488600 |
| N | 1.85040800  | -1.63730900 | -0.16656900 |
| N | 0.89198400  | 0.98176000  | 0.04090700  |
| C | -1.39452200 | 0.14010100  | 0.03950900  |
| C | -0.01147000 | -0.08496000 | -0.02949000 |



|   |             |             |             |
|---|-------------|-------------|-------------|
| C | 0.47393300  | -1.39944500 | -0.19907800 |
| C | -0.44815200 | -2.45018300 | -0.36540300 |
| C | -1.80599100 | -2.20291600 | -0.32892900 |
| C | -2.30358800 | -0.90149300 | -0.11462900 |
| B | 2.35580300  | -3.15085100 | -0.19115300 |
| F | 1.95004800  | -3.74783300 | -1.36852200 |
| F | 1.86265200  | -3.79804400 | 0.92311100  |
| B | 0.30625300  | 2.46588100  | 0.03929300  |
| F | -0.40112200 | 2.66027800  | -1.12995300 |
| F | -0.47804700 | 2.65124900  | 1.16198500  |
| O | 3.44043600  | 4.21645200  | -0.01623200 |
| C | 5.47823000  | 5.45657500  | -0.06281800 |
| C | 4.88303000  | 4.06512800  | -0.08700900 |
| O | 5.86682800  | -2.49261600 | 0.16053400  |
| C | 8.21128500  | -2.14942200 | 0.43688800  |
| C | 6.86628600  | -1.45889300 | 0.36372800  |
| C | -7.98279200 | 0.17824700  | 0.13618200  |
| F | -8.29162100 | 0.76970300  | 1.31766400  |
| F | -8.73788300 | -0.94151200 | 0.05708300  |
| F | -8.40383100 | 1.01777100  | -0.83714000 |
| H | -3.61513600 | 1.30847700  | -0.99542800 |
| H | -6.03654000 | 1.76645400  | -0.89509700 |
| H | -6.68885600 | -2.07049000 | 0.93152600  |
| H | -4.26558900 | -2.51568600 | 0.86755400  |
| H | 4.17862900  | 1.64789600  | -0.15687000 |
| H | 4.77360300  | -0.05385500 | 0.31908500  |
| H | -1.75693400 | 1.13422000  | 0.24620900  |
| H | -0.09411100 | -3.45400000 | -0.54144000 |
| H | -2.49412800 | -3.02556100 | -0.48972200 |
| H | 6.56881900  | 5.38365500  | -0.11655300 |
| H | 5.12650800  | 6.04385600  | -0.91590300 |
| H | 5.20932500  | 5.97770300  | 0.86048700  |
| H | 5.21173300  | 3.46757500  | 0.76922400  |
| H | 5.13094800  | 3.53487800  | -1.01197900 |

|   |            |             |             |
|---|------------|-------------|-------------|
| H | 8.99414800 | -1.40053900 | 0.59155800  |
| H | 8.23839400 | -2.85793200 | 1.26972800  |
| H | 8.42233500 | -2.68698400 | -0.49200800 |
| H | 6.81486900 | -0.75715500 | -0.47465400 |
| H | 6.63287800 | -0.92800200 | 1.29196500  |

### 3c

SCF energy = -2226.7342516 Hartree

|   |             |             |             |
|---|-------------|-------------|-------------|
| F | -1.22025000 | 2.62824900  | 0.88979300  |
| F | -3.74404800 | -3.76824700 | 1.27196200  |
| F | -1.28353600 | 2.40569100  | -1.39132700 |
| F | -3.83073000 | -3.90409700 | -1.01577200 |
| O | -5.19566400 | 4.09052200  | -0.37818600 |
| O | -3.08166800 | 3.36788000  | -0.27280900 |
| O | -5.70074100 | -3.19630100 | 0.15017400  |
| O | -7.71432000 | -2.41509900 | 0.35371900  |
| N | 6.14194700  | -0.17290800 | 0.05042400  |
| N | -2.63428700 | 0.89273200  | -0.06431500 |
| N | -3.67124400 | -1.70589900 | 0.00500100  |
| C | 1.96630200  | -0.86168100 | -0.01680500 |
| C | -2.28707200 | -1.51314900 | -0.05030600 |
| C | -3.97079900 | 0.71124800  | -0.06179300 |
| C | -0.37360500 | -0.01380100 | 0.00435100  |
| H | 0.02084000  | 0.98529700  | 0.09657100  |
| C | -1.39618000 | -2.60234100 | -0.09362100 |
| H | -1.77922000 | -3.60946400 | -0.14638600 |
| C | -6.42906800 | -2.12912900 | 0.23651200  |
| C | -5.89763600 | -0.84814400 | 0.19363700  |
| H | -6.55345600 | -0.00354800 | 0.28745200  |
| C | 3.89411600  | 0.49428000  | -0.62618700 |
| H | 4.31208600  | 1.35431700  | -1.13815000 |
| C | -4.34339800 | 3.09012100  | -0.27667700 |
| C | 8.16970400  | 0.85736500  | 0.34048900  |
| C | 4.20794500  | -1.53544600 | 0.65139800  |

|   |             |             |             |
|---|-------------|-------------|-------------|
| H | 4.86379300  | -2.21911900 | 1.17960800  |
| C | -1.76308900 | -0.20291800 | -0.03268400 |
| C | -4.66820300 | 5.44712600  | -0.49205000 |
| H | -4.06354600 | 5.65436200  | 0.39423800  |
| H | -4.02343200 | 5.49098300  | -1.37317900 |
| C | 2.52208100  | 0.27041100  | -0.63660300 |
| H | 1.87578100  | 0.96476700  | -1.16418400 |
| C | 2.83614700  | -1.76247400 | 0.61933700  |
| H | 2.43303200  | -2.62996200 | 1.13209600  |
| C | -4.51255100 | -0.65948000 | 0.04921000  |
| C | 7.13174500  | -1.09130800 | -0.31850300 |
| C | -4.84453100 | 1.79752400  | -0.17550500 |
| H | -5.91251900 | 1.67767400  | -0.21643200 |
| C | 4.74608500  | -0.40564200 | 0.02478600  |
| C | 0.50596600  | -1.09182000 | -0.03209900 |
| C | 6.19508500  | 2.19526400  | 0.93768200  |
| H | 5.12117200  | 2.30294700  | 1.04105700  |
| C | -0.03105700 | -2.39365200 | -0.09097200 |
| H | 0.63179100  | -3.24969800 | -0.15565000 |
| C | -8.68651800 | -1.34002100 | 0.43715000  |
| H | -8.45885800 | -0.73351300 | 1.31936000  |
| H | -8.59578800 | -0.71835700 | -0.45912200 |
| C | 9.01435800  | 1.91286400  | 0.70144000  |
| H | 10.09237500 | 1.80525800  | 0.61967900  |
| C | 9.43467400  | -2.50503000 | -0.95527500 |
| H | 10.32348900 | -3.07634700 | -1.20560200 |
| C | 8.16551300  | -3.08499000 | -1.12863400 |
| H | 8.08868200  | -4.09684900 | -1.51584000 |
| C | 7.05843400  | 3.23096700  | 1.29108600  |
| H | 6.64075400  | 4.15964200  | 1.66896700  |
| C | -5.85961500 | 6.37290700  | -0.60450400 |
| H | -6.45627100 | 6.13629000  | -1.49052500 |
| H | -6.49764600 | 6.29864400  | 0.28118800  |
| H | -5.50569600 | 7.40498300  | -0.69071500 |

|   |              |             |             |
|---|--------------|-------------|-------------|
| C | 8.40438900   | -0.48450800 | -0.15236300 |
| B | -4.21968200  | -3.19974500 | 0.10717000  |
| C | -10.05317100 | -1.98323800 | 0.53729900  |
| H | -10.25797200 | -2.59774600 | -0.34412500 |
| H | -10.12210400 | -2.61132900 | 1.43014800  |
| H | -10.81648200 | -1.20166500 | 0.60177000  |
| C | 8.45312800   | 3.09743400  | 1.17164100  |
| H | 9.09680500   | 3.92523700  | 1.45356600  |
| B | -2.00007500  | 2.34221500  | -0.21409600 |
| C | 6.99850600   | -2.38912600 | -0.81729100 |
| H | 6.02316500   | -2.83993200 | -0.96245200 |
| C | 6.76345100   | 1.01532900  | 0.45237200  |
| C | 9.56035600   | -1.20502300 | -0.47203000 |
| H | 10.54036800  | -0.75260300 | -0.34849100 |

## VI. Reference

- (1) Zykova, S. S.; Odegova, T. F.; Karmanova, O. G.; Makhmudov, R. R. Synthesis and Biological Activity of 2,3-Bis-(2-Oxoylidene)-1,2,3,4-Tetrahydroquinoxalines. *Pharm. Chem. J.* **2015**, *48*, 640–645.
- (2) Yu, C.; Jiao, L.; Zhang, P.; Feng, Z.; Cheng, C.; Wei, Y.; Mu, X.; Hao, E. Highly Fluorescent BF<sub>2</sub> Complexes of Hydrazine–Schiff Base Linked Bispyrrole. *Org. Lett.* **2014**, *16*, 3048–3051.
- (3) Miao, W.; Feng, Y.; Wu, Q.; Sheng, W.; Li, M.; Liu, Q.; Hao, E.; Jiao, L. Phenanthro[b]-Fused BODIPYs through Tandem Suzuki and Oxidative Aromatic Couplings: Synthesis and Photophysical Properties. *J. Org. Chem.* **2019**, *84*, 9693–9704.
- (4) Li, X.; Ji, G.; Son, Y.-A. Tunable Emission of Hydrazine-Containing Bipyrrrole Fluorine–Boron Complexes by Linear Extension. *Dyes Pigments* **2016**, *124*, 232–240.
- (5) Kölmel, D. K.; Hörner, A.; Castañeda, J. A.; Ferencz, J. A. P.; Bihlmeier, A.; Nieger, M.; Bräse, S.; Padilha, L. A. Linear and Nonlinear Optical Spectroscopy of Fluoroalkylated BODIPY Dyes. *J. Phys. Chem. C* **2016**, *120*, 4538–4545.
- (6) Gao, Y.; Shi, E.; Deng, S.; Shiring, S. B.; Snaider, J. M.; Liang, C.; Yuan, B.; Song, R.; Janke, S. M.; Liebman-Pel áez, A.; Yoo, P.; Zeller, M.; Boudouris, B. W.; Liao, P.; Zhu, C.; Blum, V.; Yu, Y.; Savoie, B. M.; Huang, L.; Dou, L. Molecular Engineering of Organic–Inorganic Hybrid Perovskites Quantum Wells. *Nat. Chem.* **2019**, *11*, 1151–1157.
- (7) Jin, C.; Li, K.; Zhang, J.; Wang, Z.; Tan, J. *N,O*-Bidentated Difluoroboron Complexes Based on Pyridine-Ester Enolates: Facile Synthesis, Post-Complexation Modification, Optical Properties, and Applications. *Chin. Chem. Lett.* **2024**, *35*, 109532.

## VII. NMR spectra

$^1\text{H}$  NMR of **1a** (400 MHz,  $\text{CDCl}_3$ )

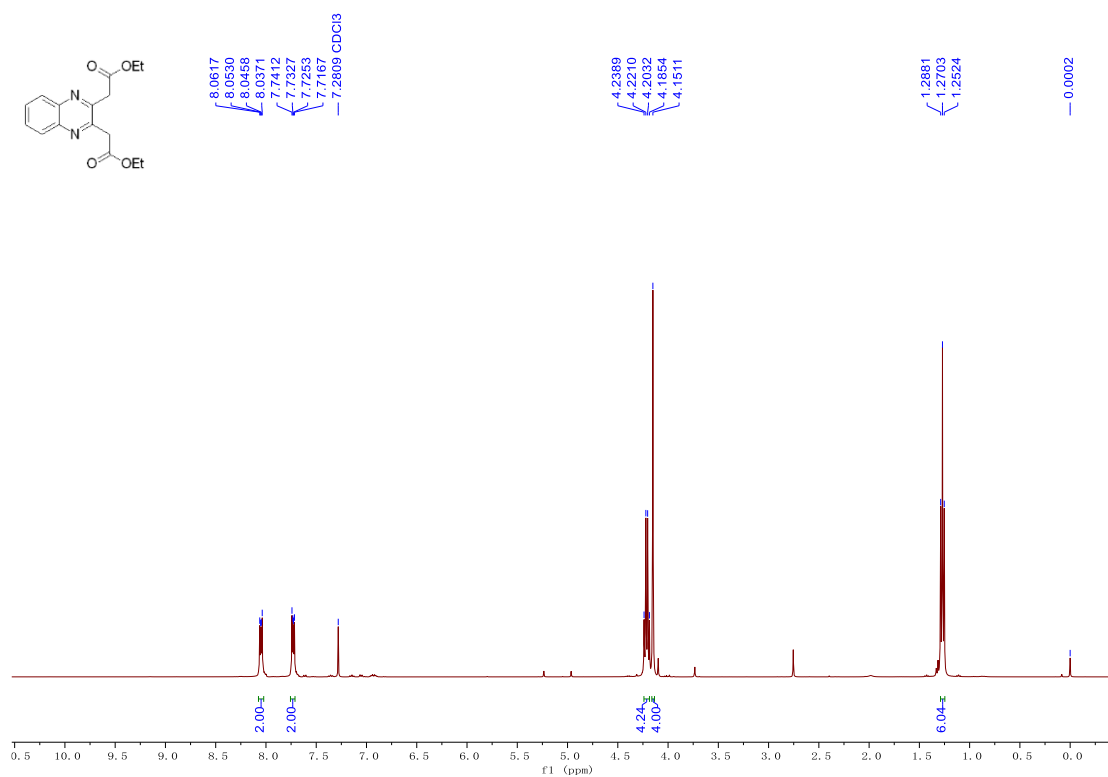

$^{13}\text{C}$  NMR of **1a** (101 MHz,  $\text{CDCl}_3$ )

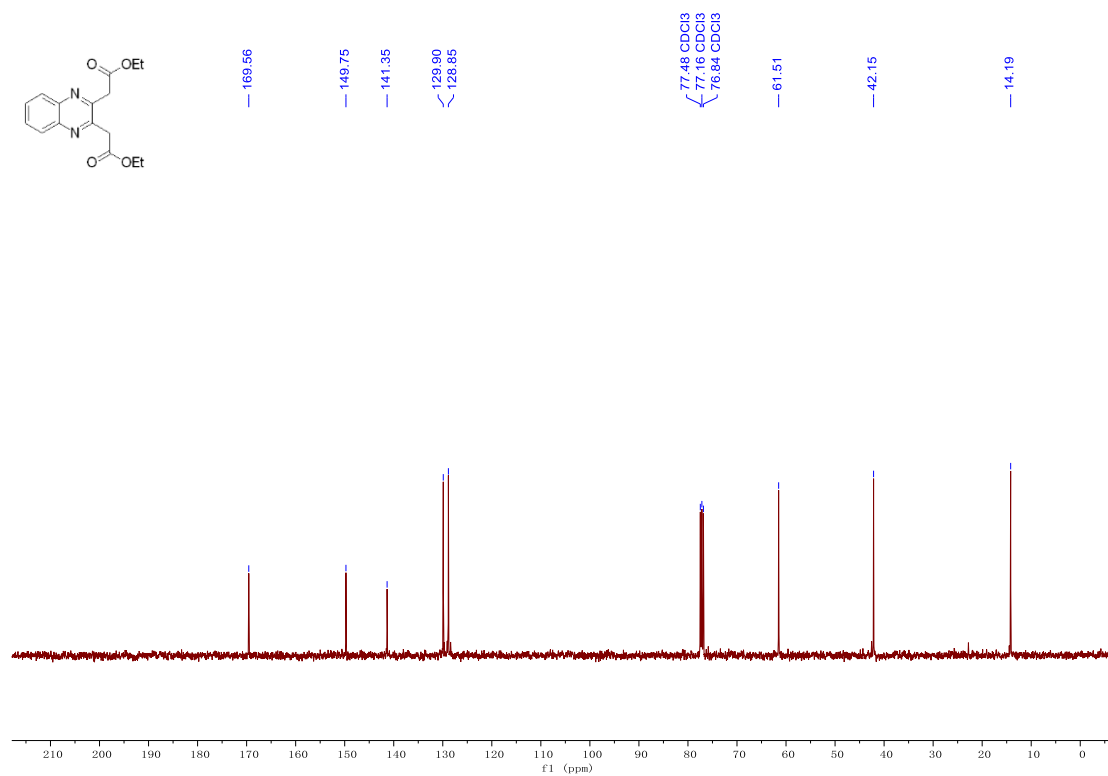

$^1\text{H}$  NMR of **1b** (400 MHz,  $\text{CDCl}_3$ )

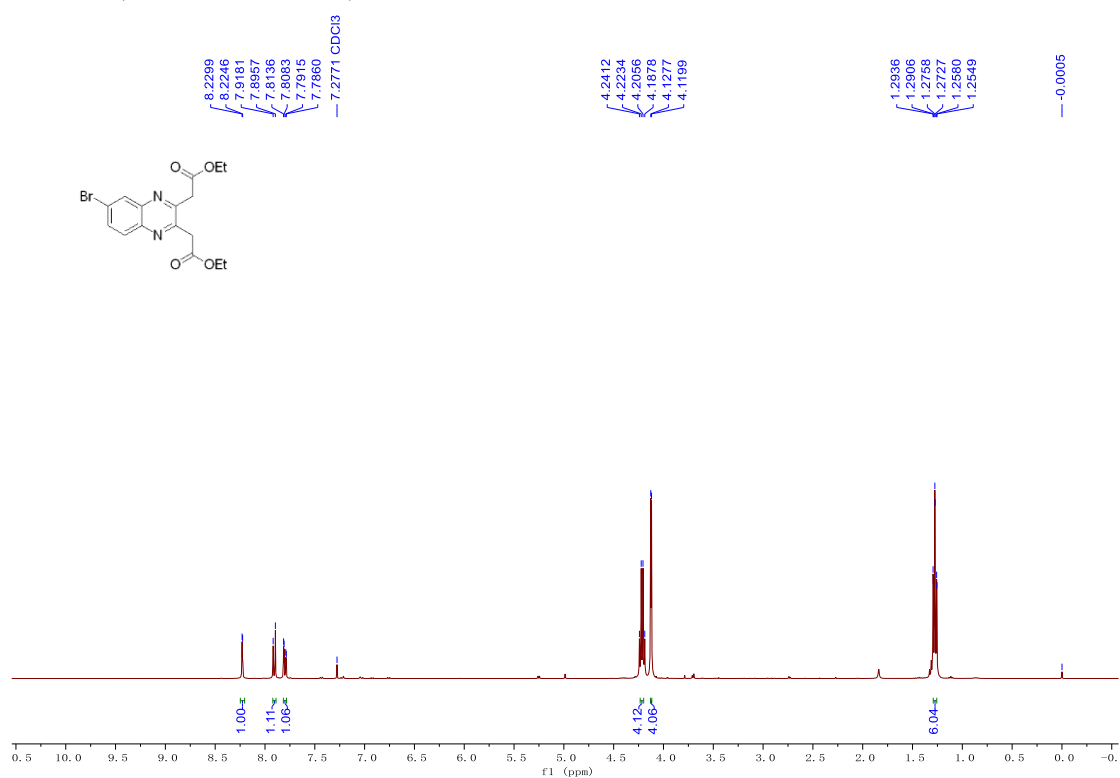

$^{13}\text{C}$  NMR of **1b** (101 MHz,  $\text{CDCl}_3$ )

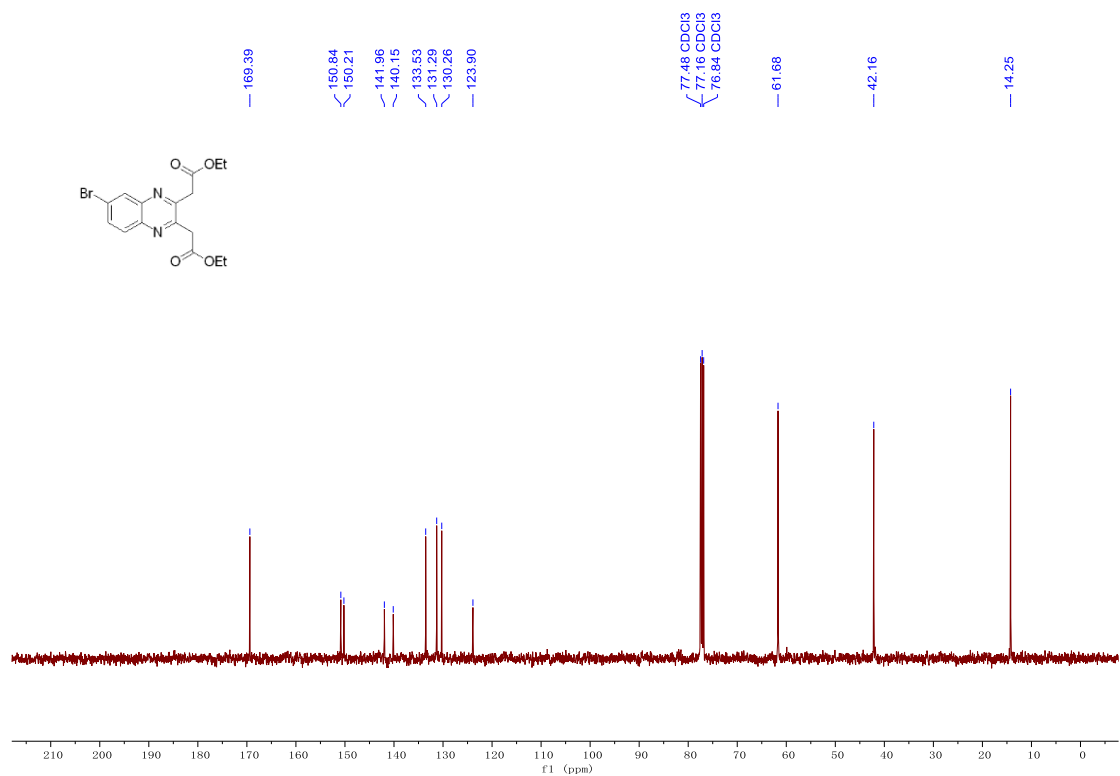

$^1\text{H}$  NMR of **1c** (400 MHz,  $\text{CDCl}_3$ )

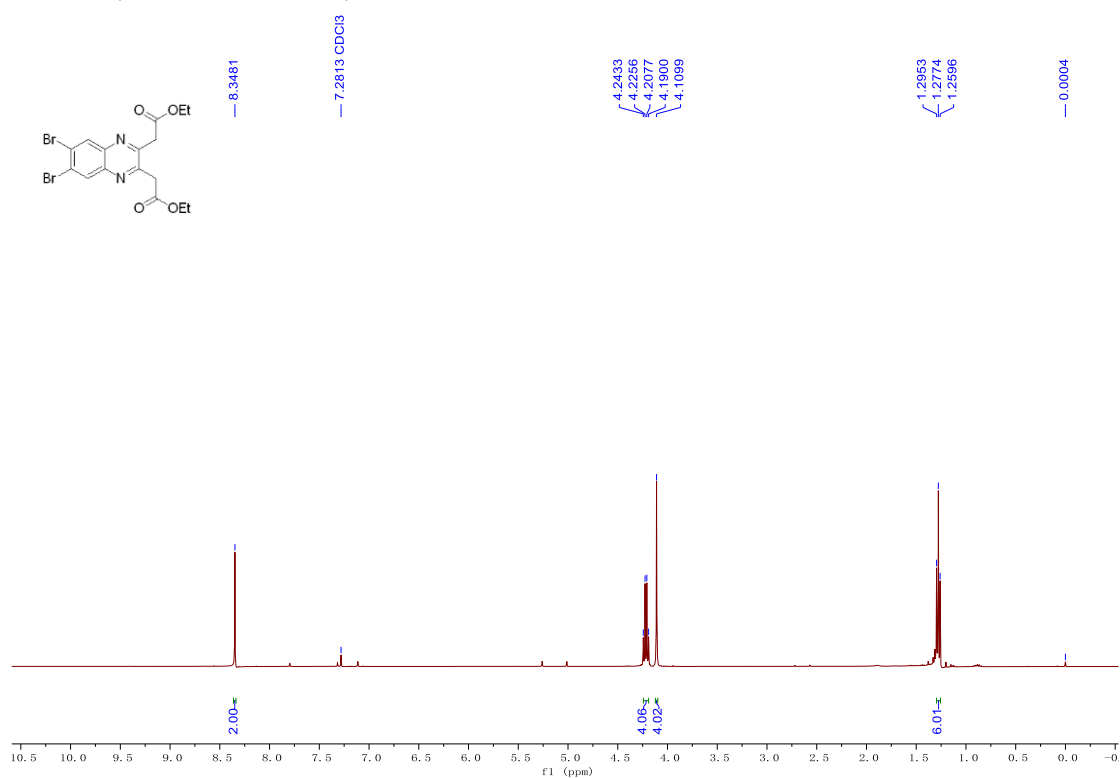

$^{13}\text{C}$  NMR of **1c** (101 MHz,  $\text{CDCl}_3$ )

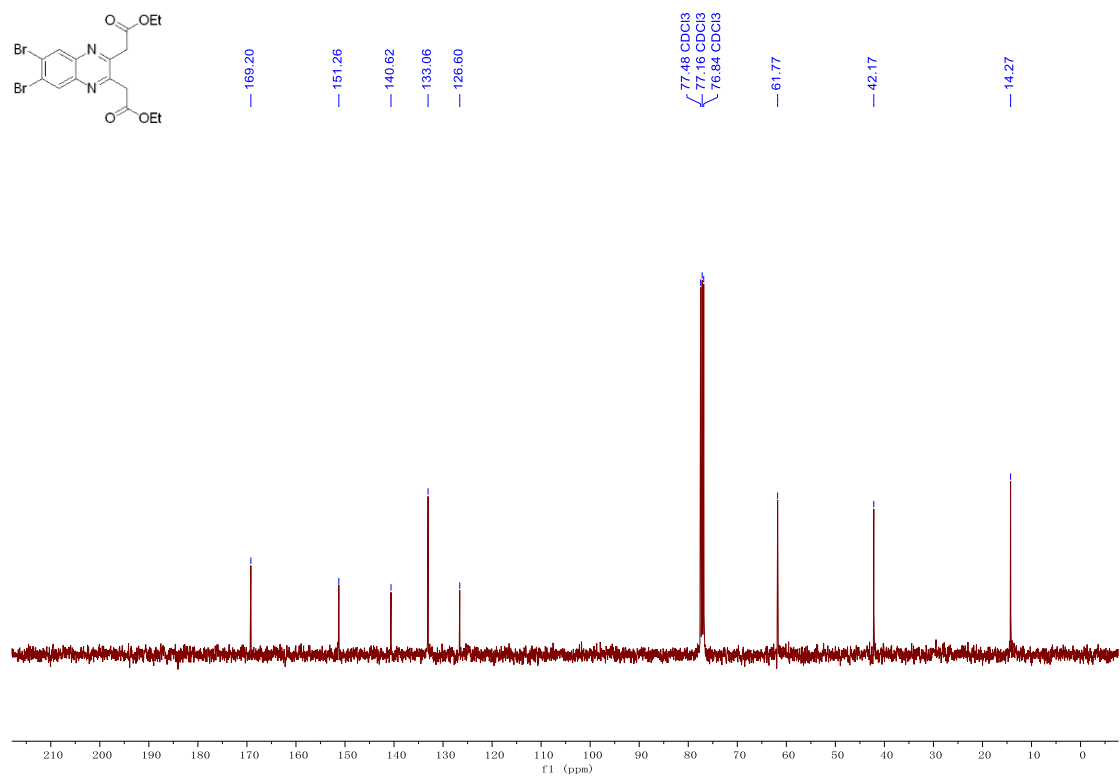



$^1\text{H}$  NMR of **2a** (400 MHz,  $\text{CDCl}_3$ )

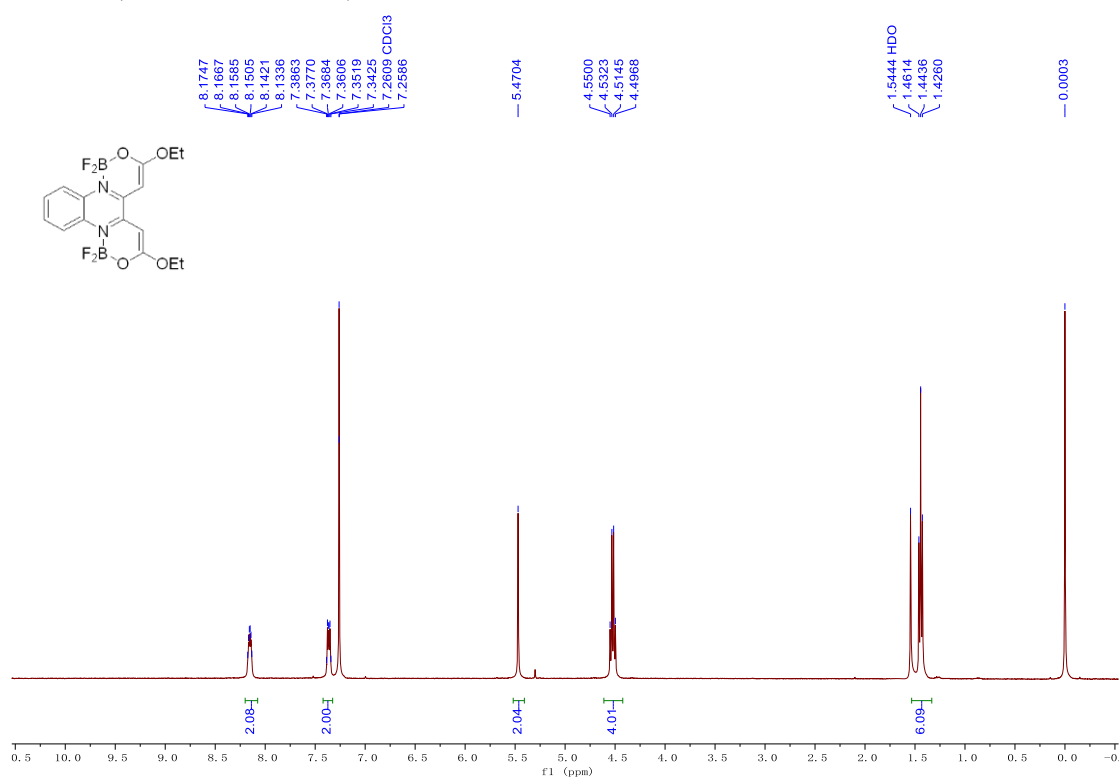

$^{13}\text{C}$  NMR of **2a** (101 MHz,  $d_6$ -DMSO)

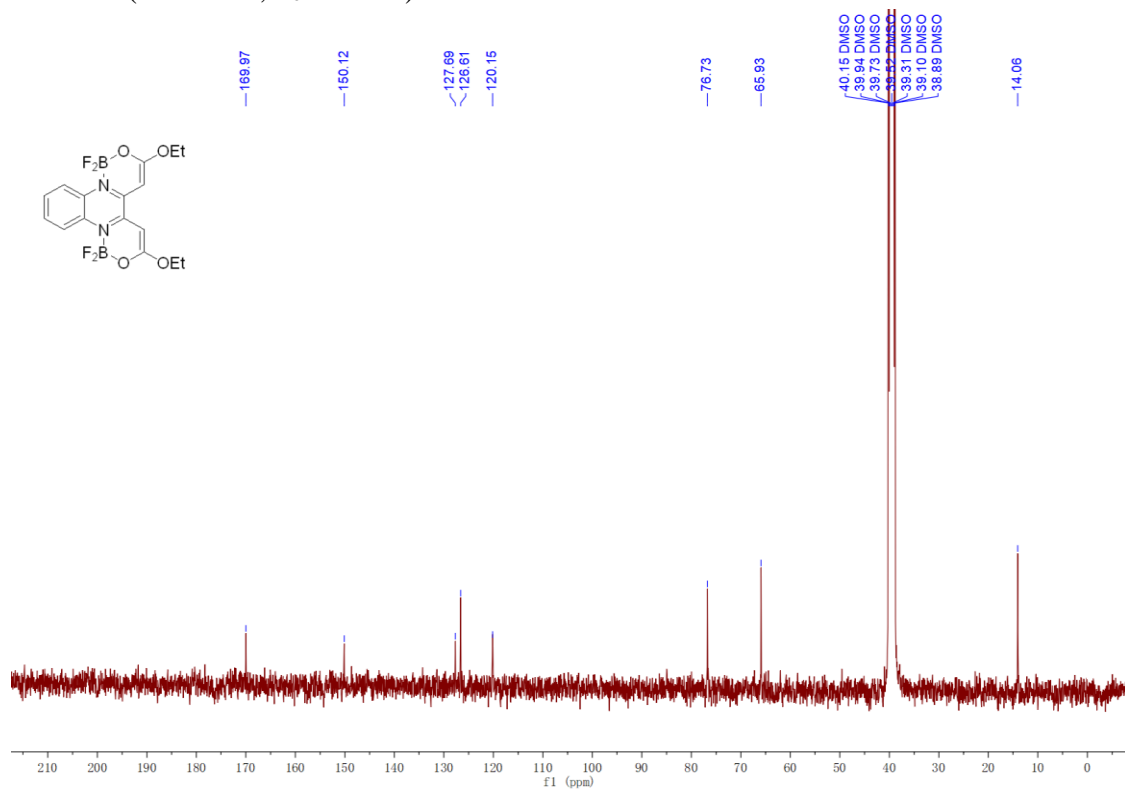

$^{19}\text{F}$  NMR of **2a** (376 MHz,  $\text{CDCl}_3$ )

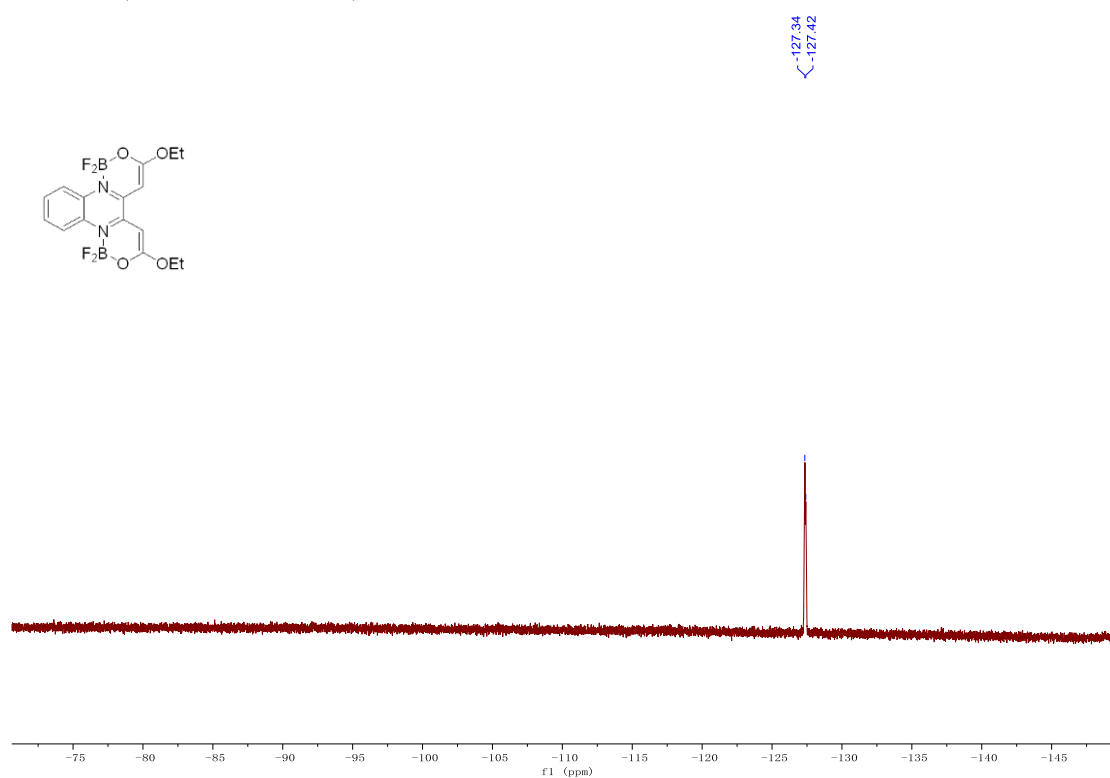

$^{11}\text{B}$  NMR of **2a** (128 MHz,  $\text{CDCl}_3$ )

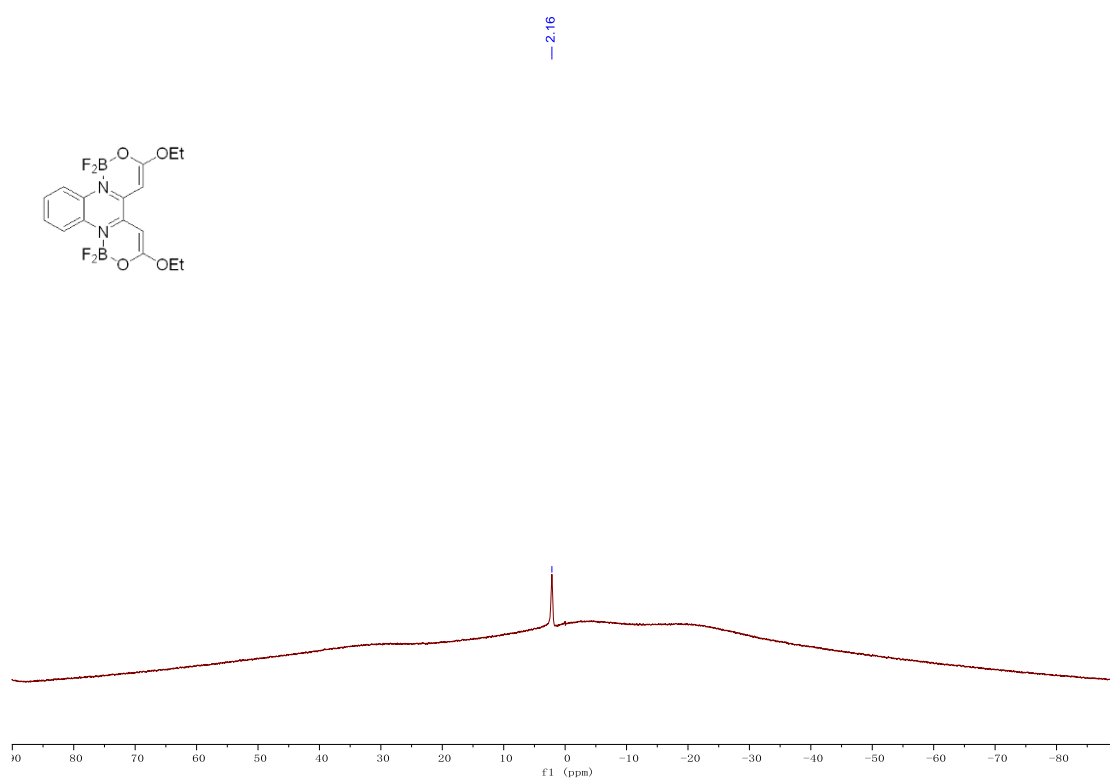

# $^1\text{H}$ NMR of **2a-mono** (400 MHz, $\text{CDCl}_3$ )

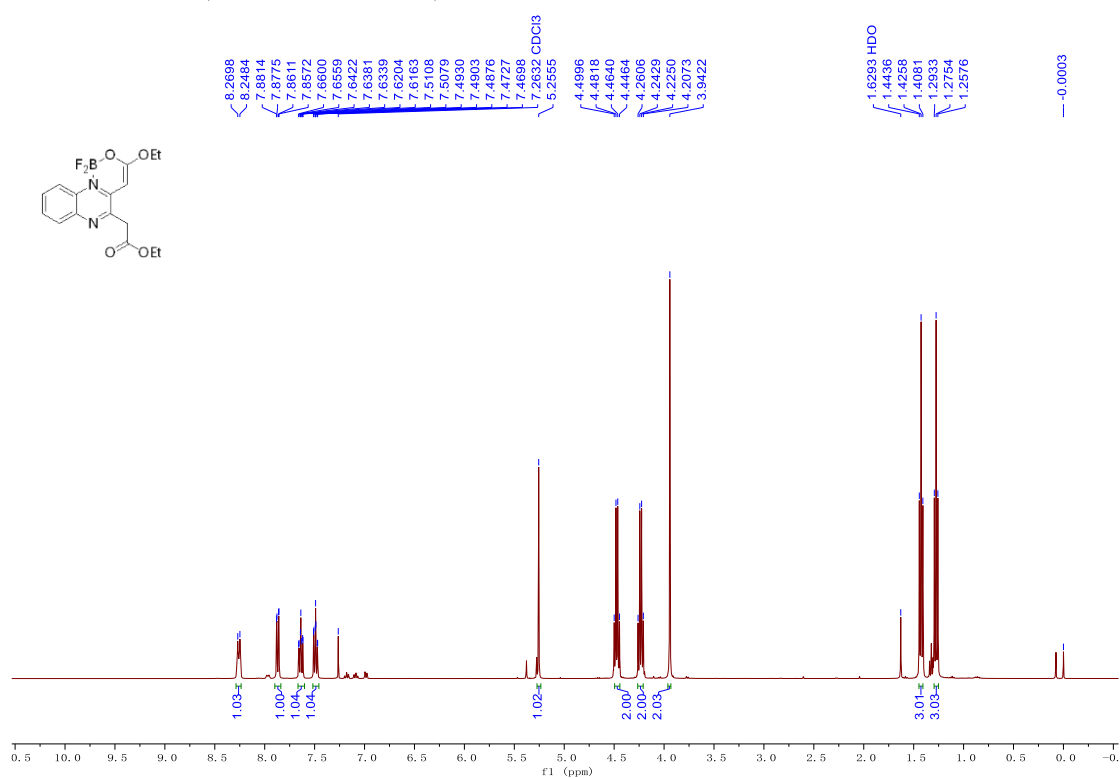

# $^{13}\text{C}$ NMR of **2a-mono** (101 MHz, $\text{CDCl}_3$ )

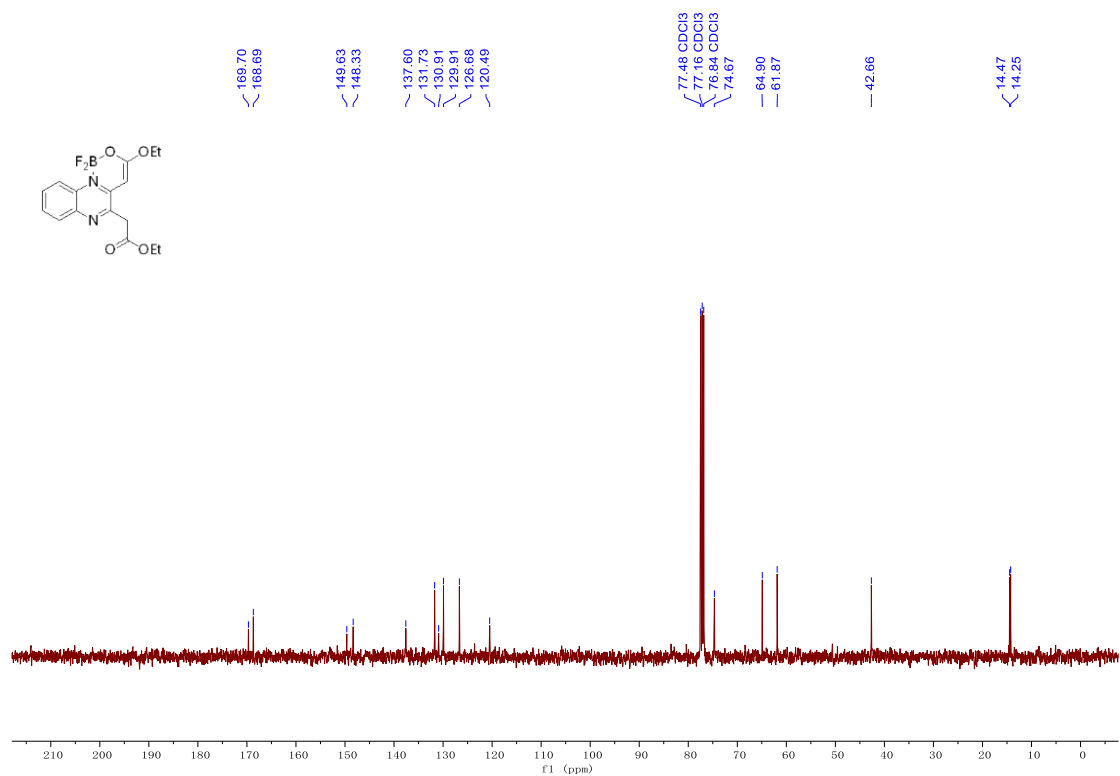

$^{19}\text{F}$  NMR of **2a-mono** (376 MHz,  $\text{CDCl}_3$ )

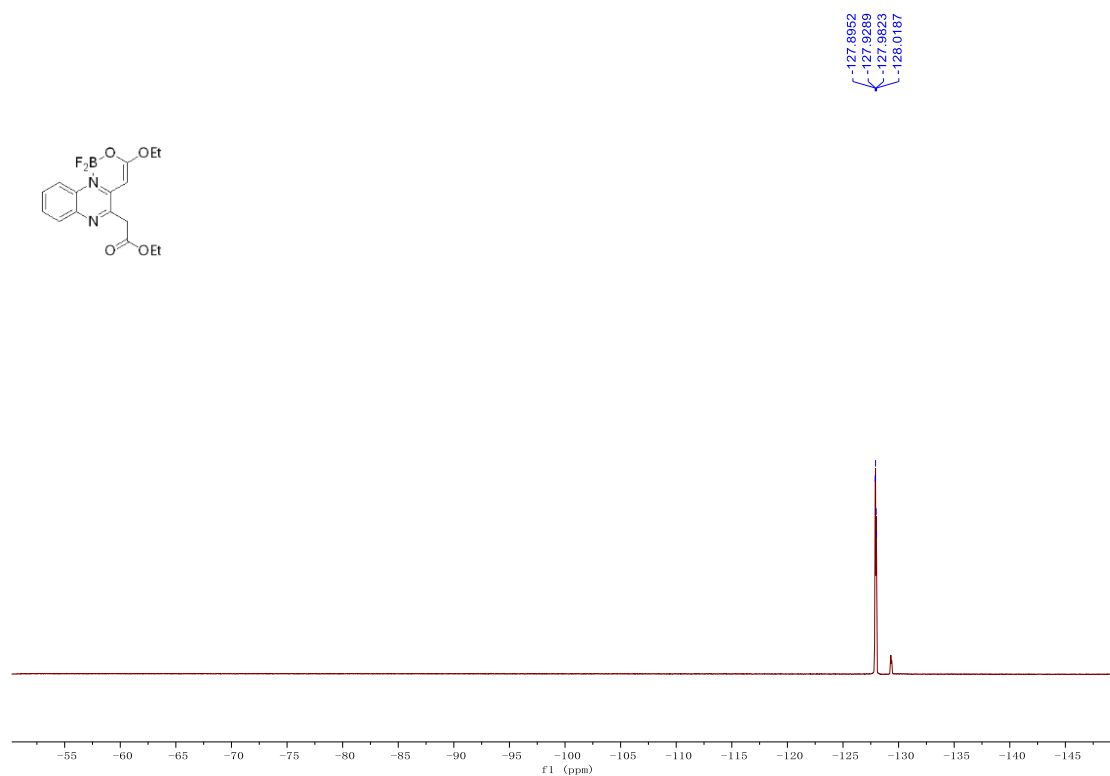

$^{11}\text{B}$  NMR of **2a-mono** (128 MHz,  $\text{CDCl}_3$ )

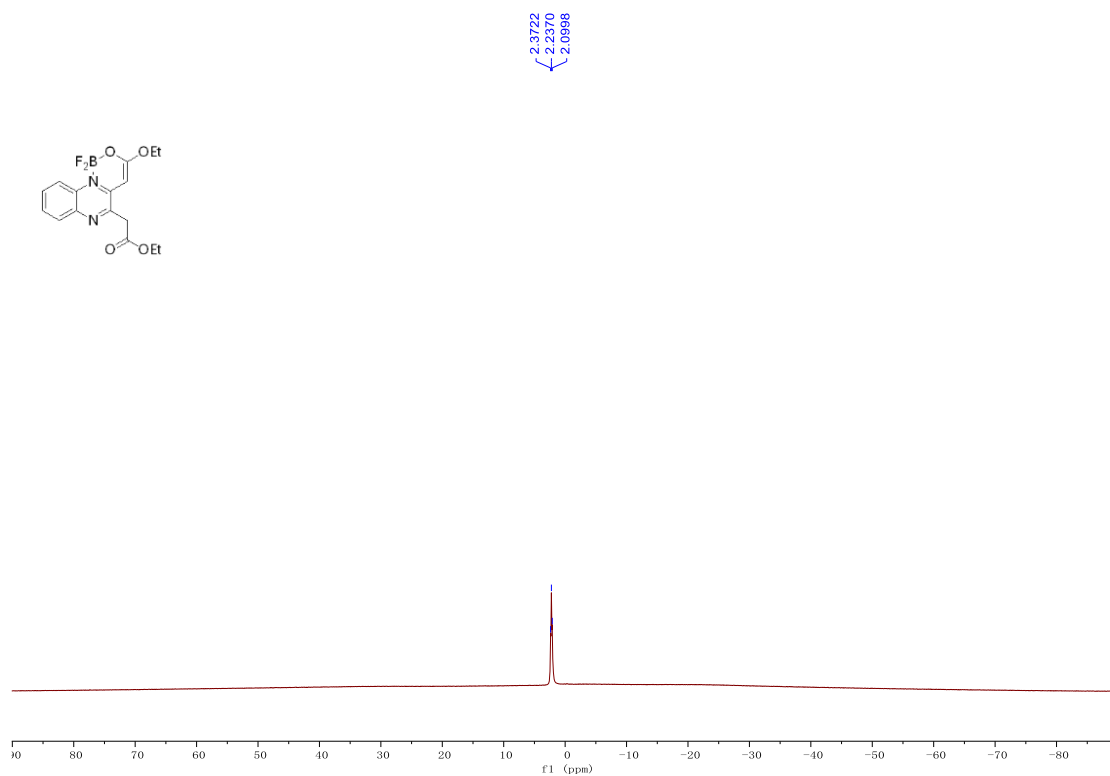

### $^1\text{H}$ NMR of **2b** (400 MHz, $\text{CDCl}_3$ )

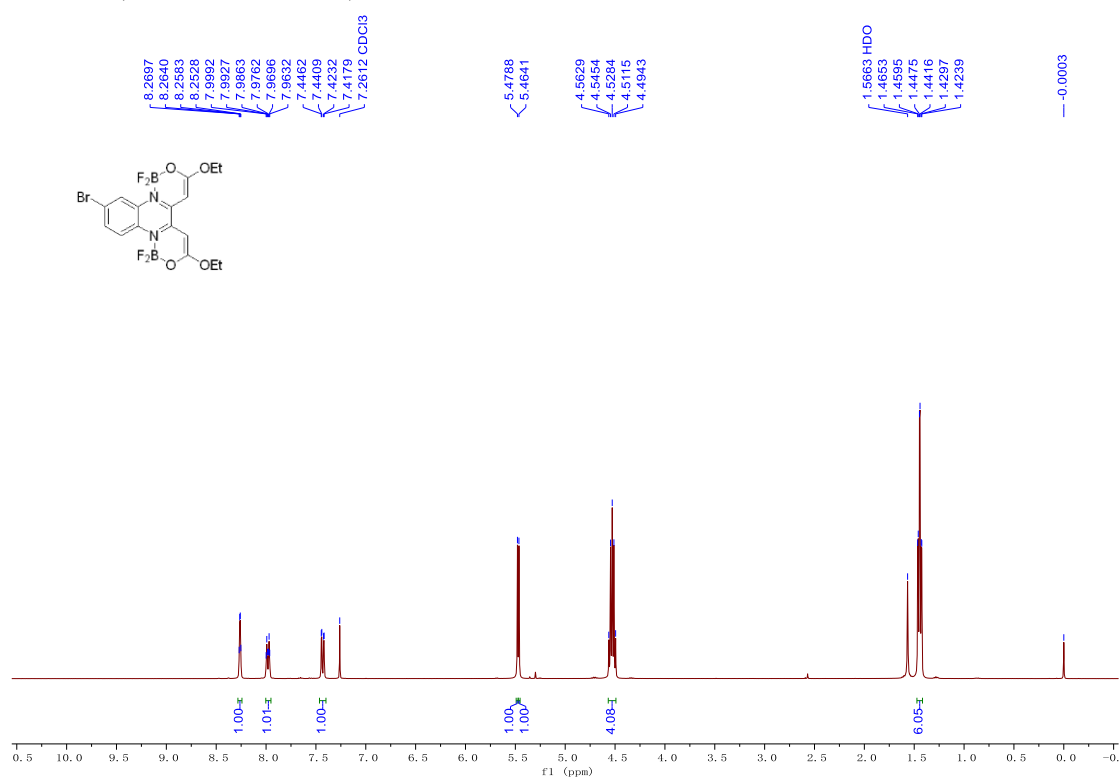

### $^{13}\text{C}$ NMR of **2b** (101 MHz, $\text{CDCl}_3$ )

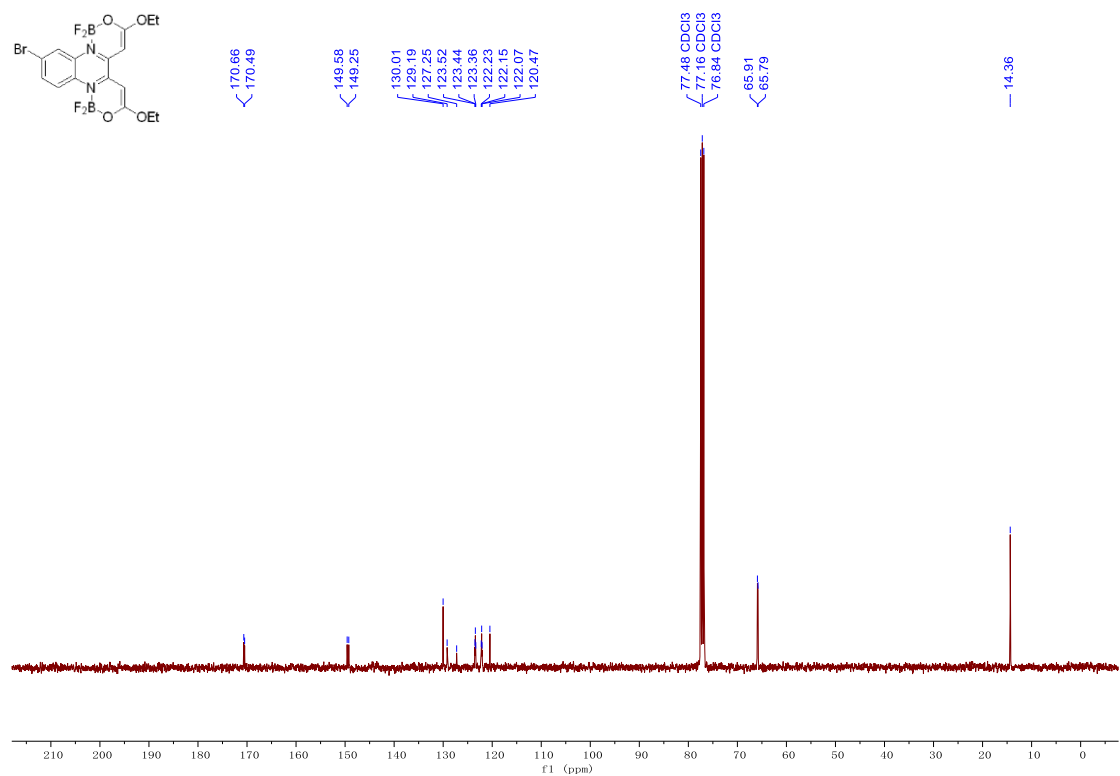

### $^{19}\text{F}$ NMR of **2b**

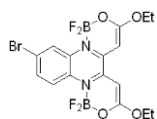

127.50  
127.57  
127.65

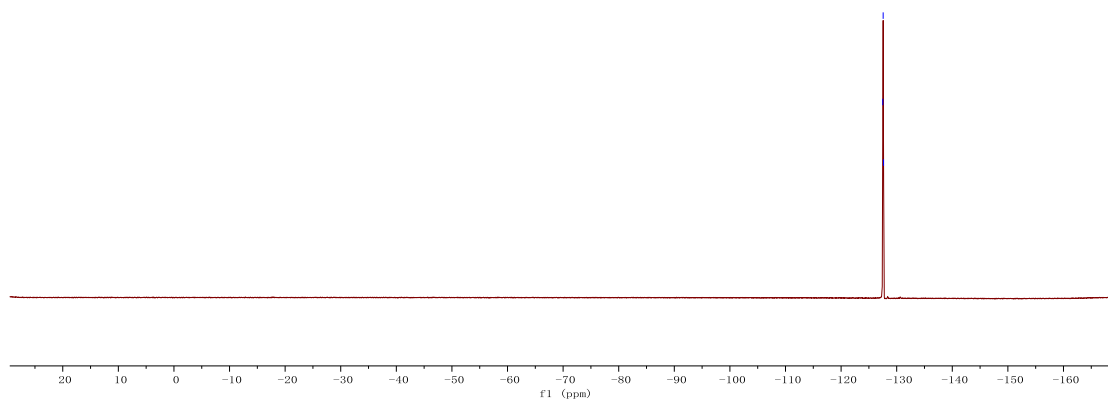

### $^{11}\text{B}$ NMR of **2b** (128 MHz, $\text{CDCl}_3$ )

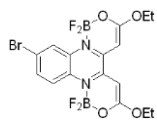

2.01

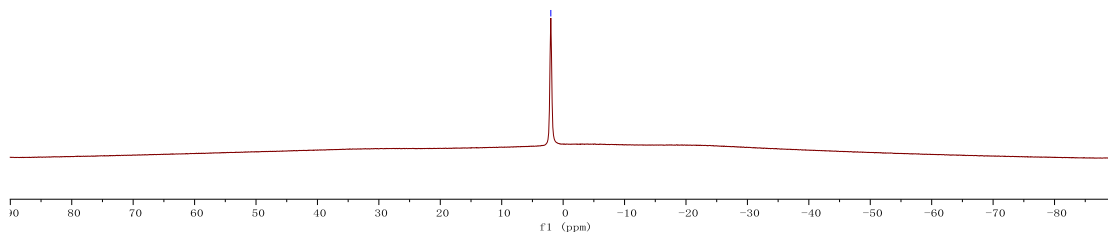

$^1\text{H}$  NMR of **2c** (400 MHz,  $\text{CDCl}_3$ )

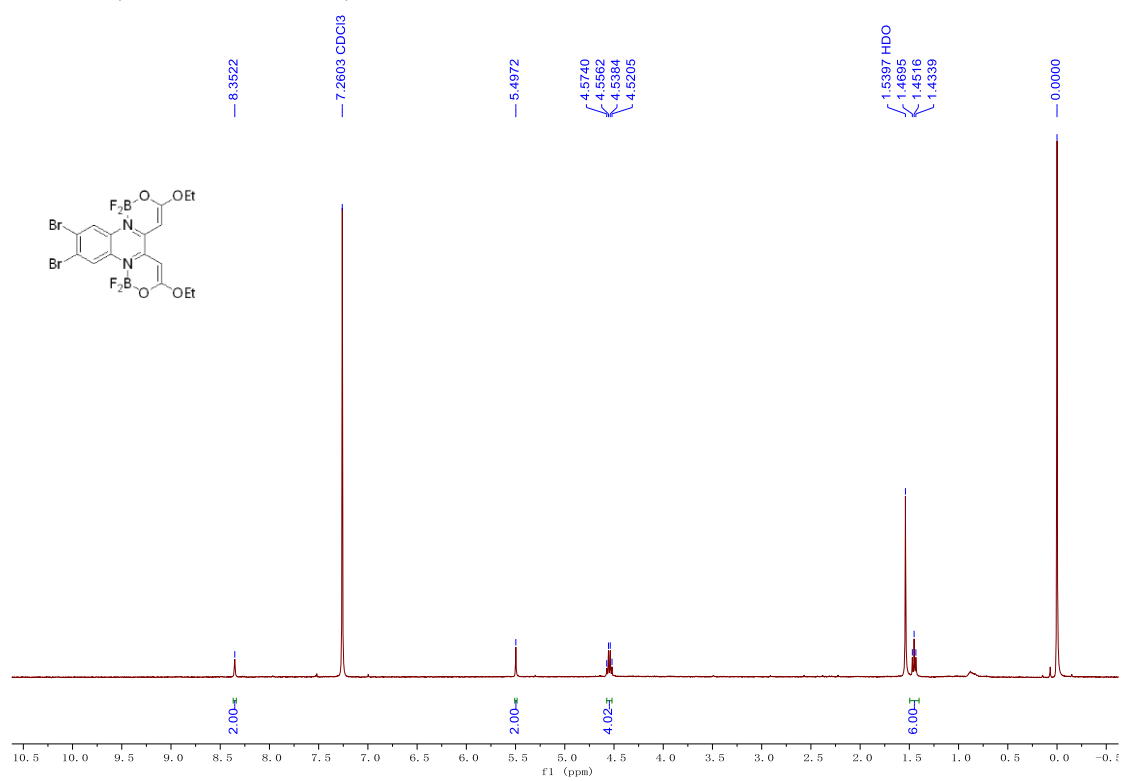

$^{19}\text{F}$  NMR of **2c** (376 MHz,  $\text{CDCl}_3$ )

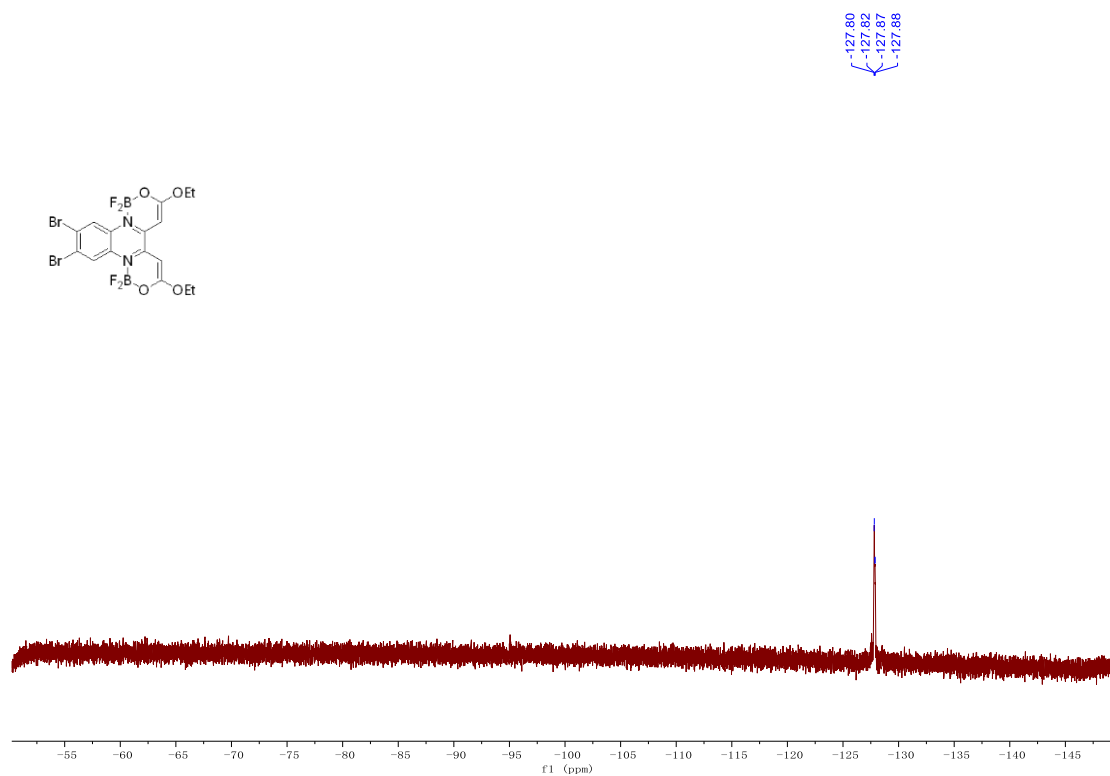

$^1\text{H}$  NMR of **3a** (400 MHz,  $\text{CDCl}_3$ )

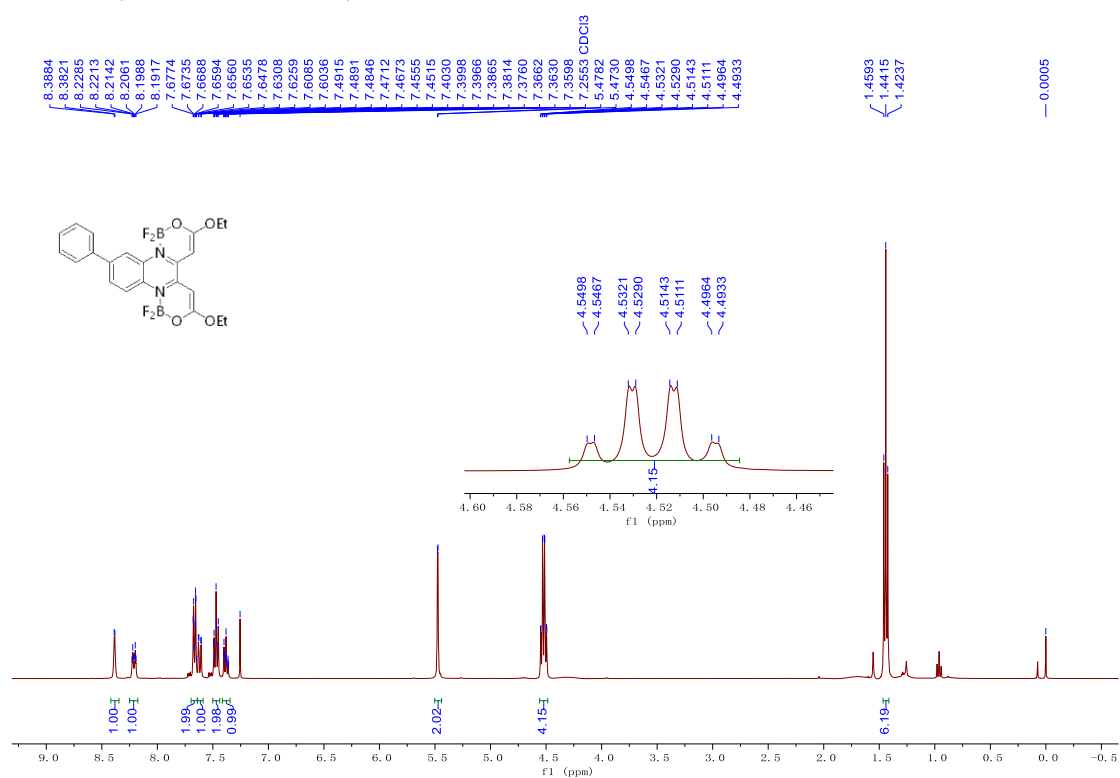

$^{13}\text{C}$  NMR of **3a** (101 MHz,  $\text{CDCl}_3$ )

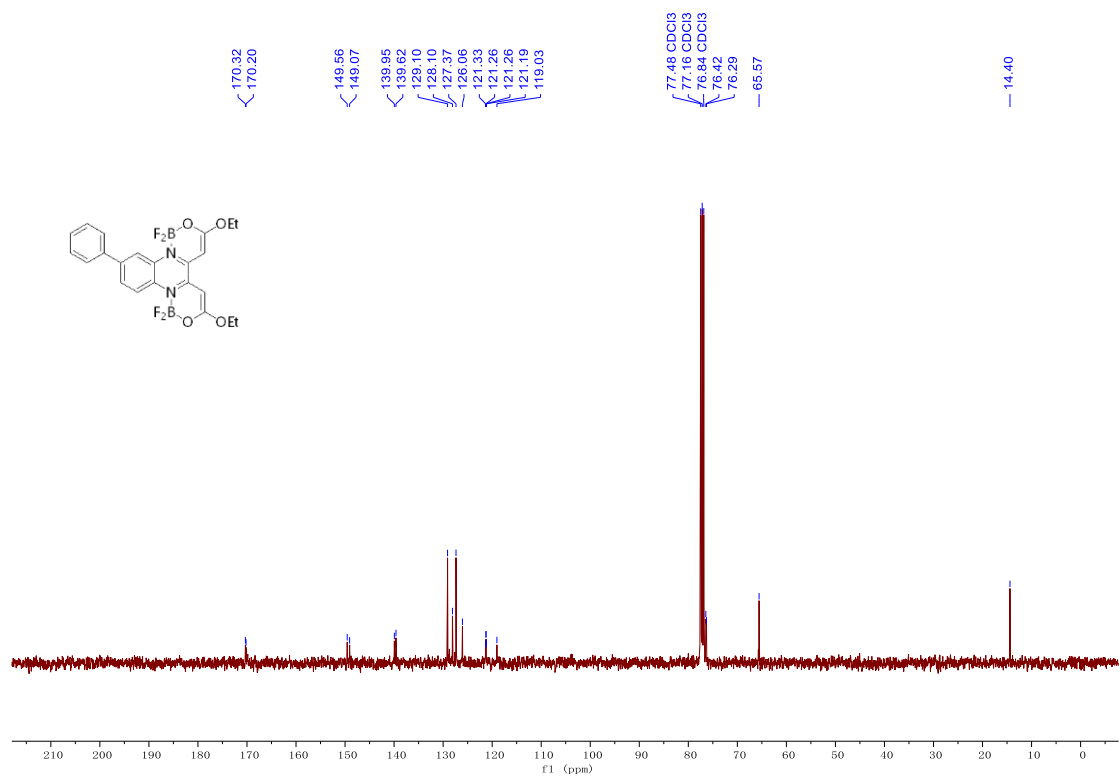



$^{19}\text{F}$  NMR of **3a** (376 MHz,  $\text{CDCl}_3$ )

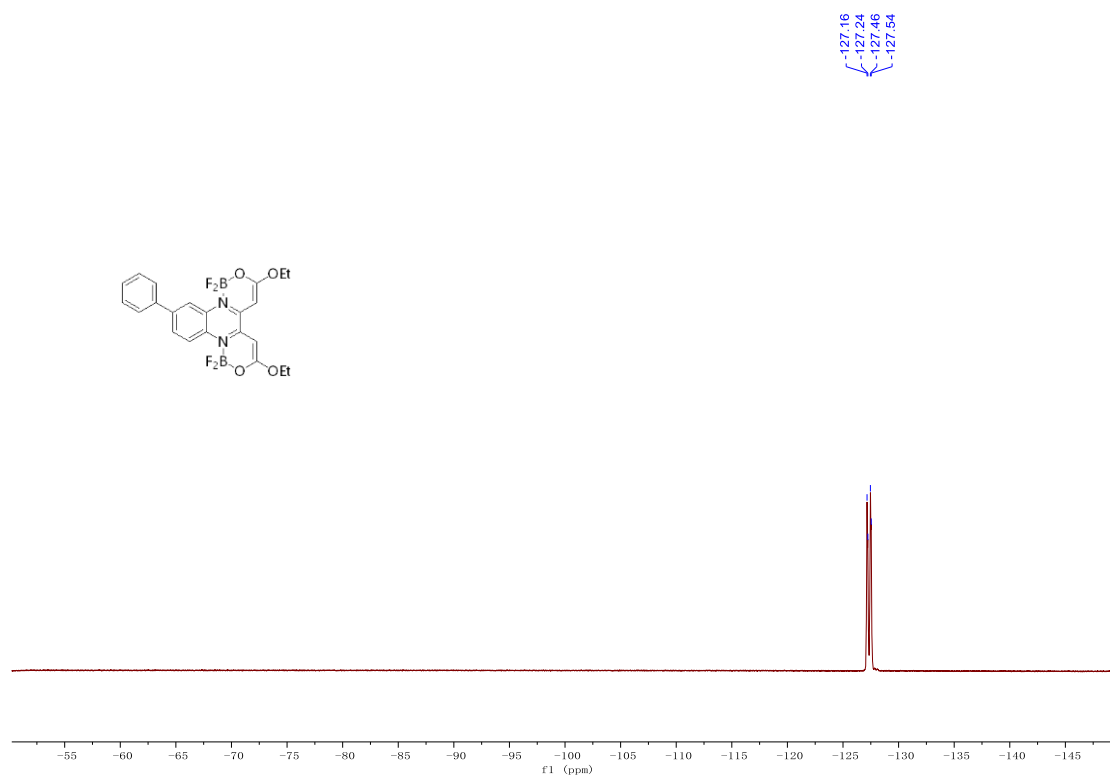

$^{11}\text{B}$  NMR of **3a** (128 MHz,  $\text{CDCl}_3$ )

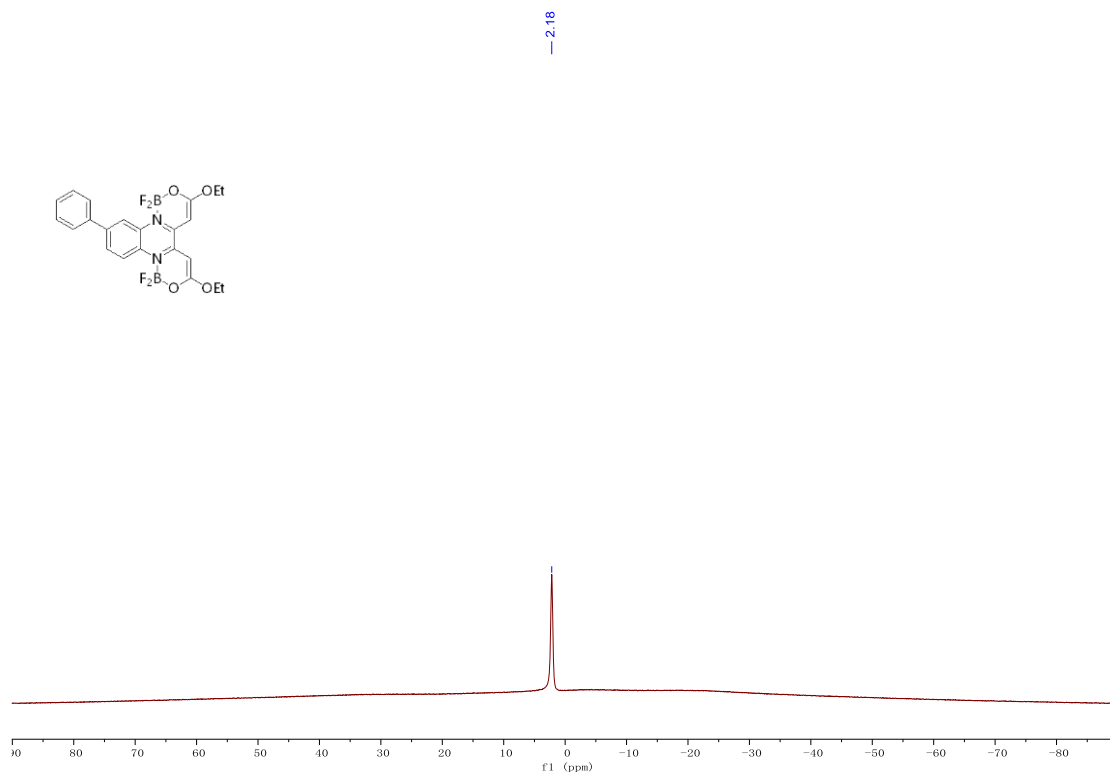

### $^1\text{H}$ NMR of **3b** (400 MHz, $\text{CDCl}_3$ )

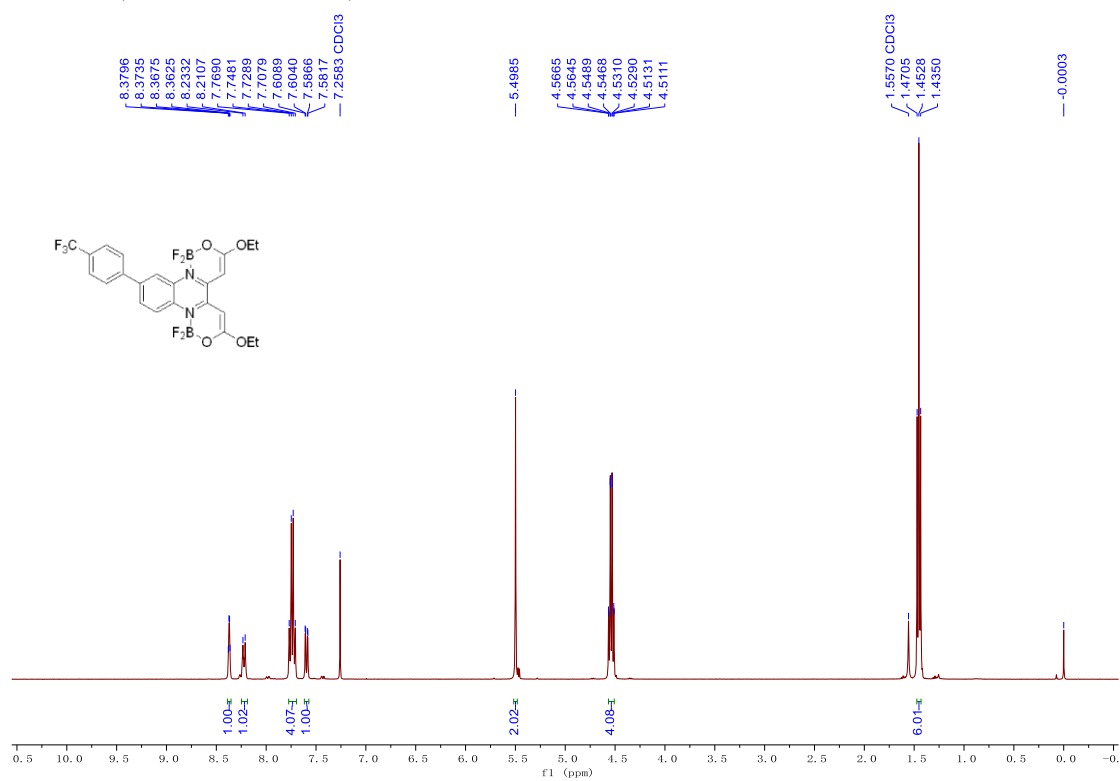

### $^{13}\text{C}$ NMR of **3b** (101 MHz, $\text{CDCl}_3$ )

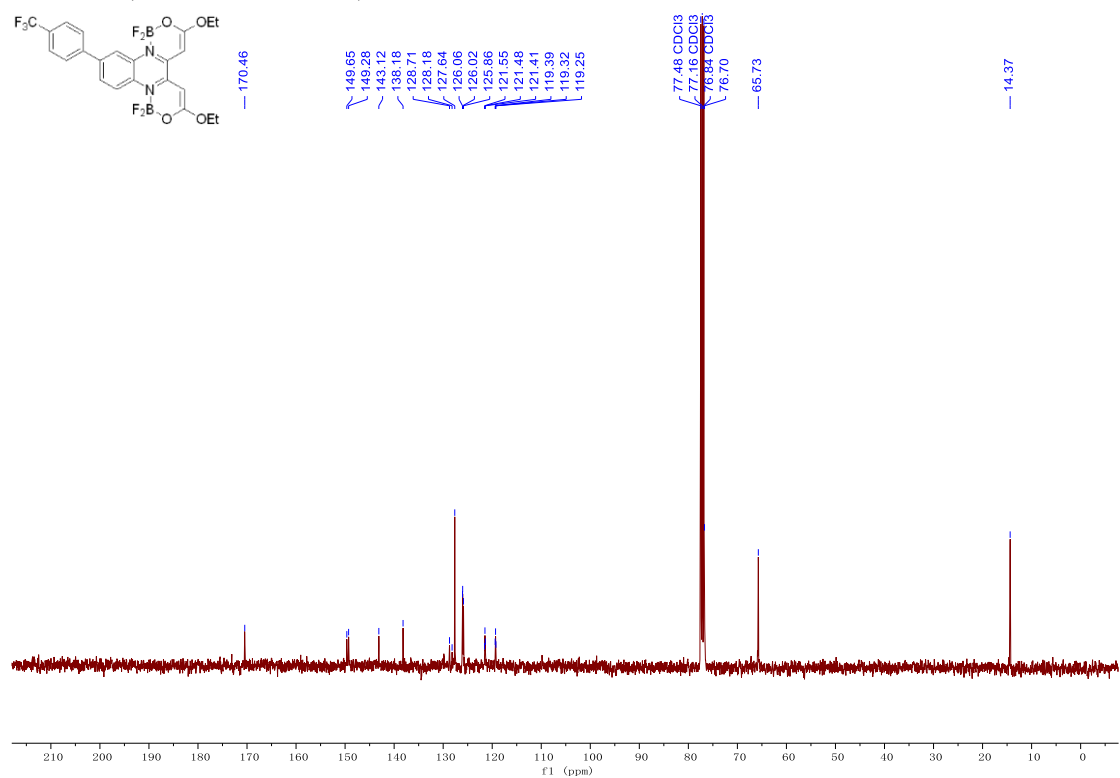

$^{19}\text{F}$  NMR of **3b** (376 MHz,  $\text{CDCl}_3$ )

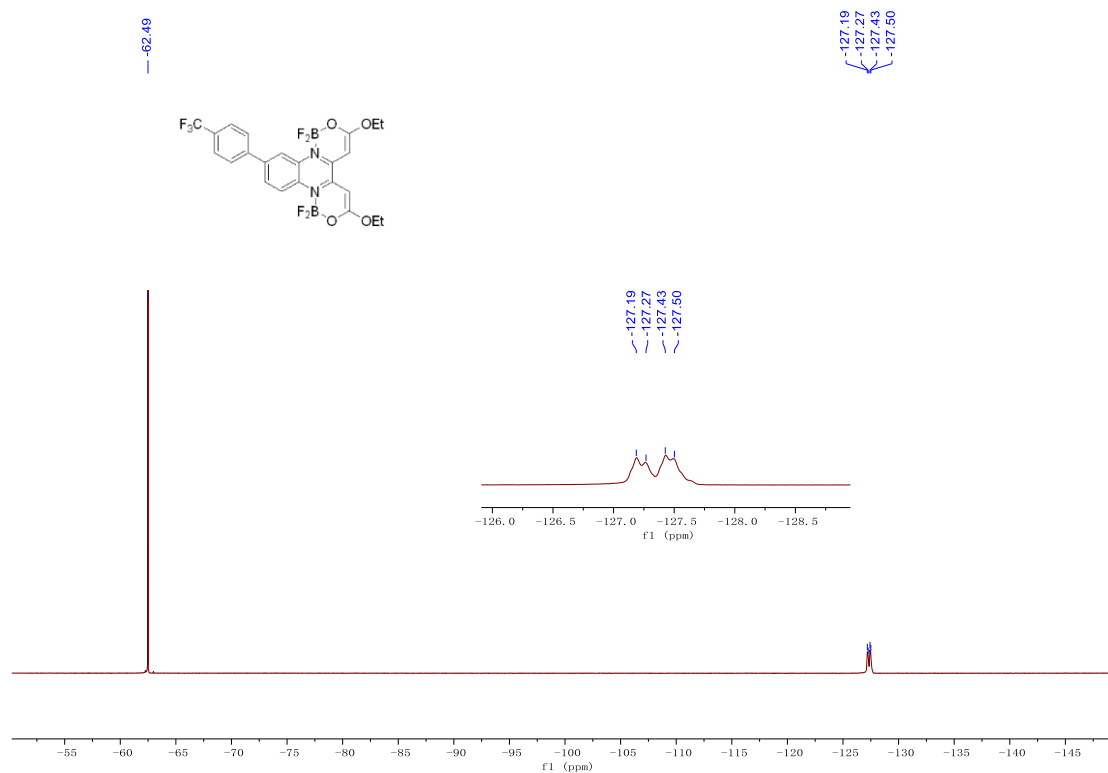

$^{11}\text{B}$  NMR of **3b** (128 MHz,  $\text{CDCl}_3$ )

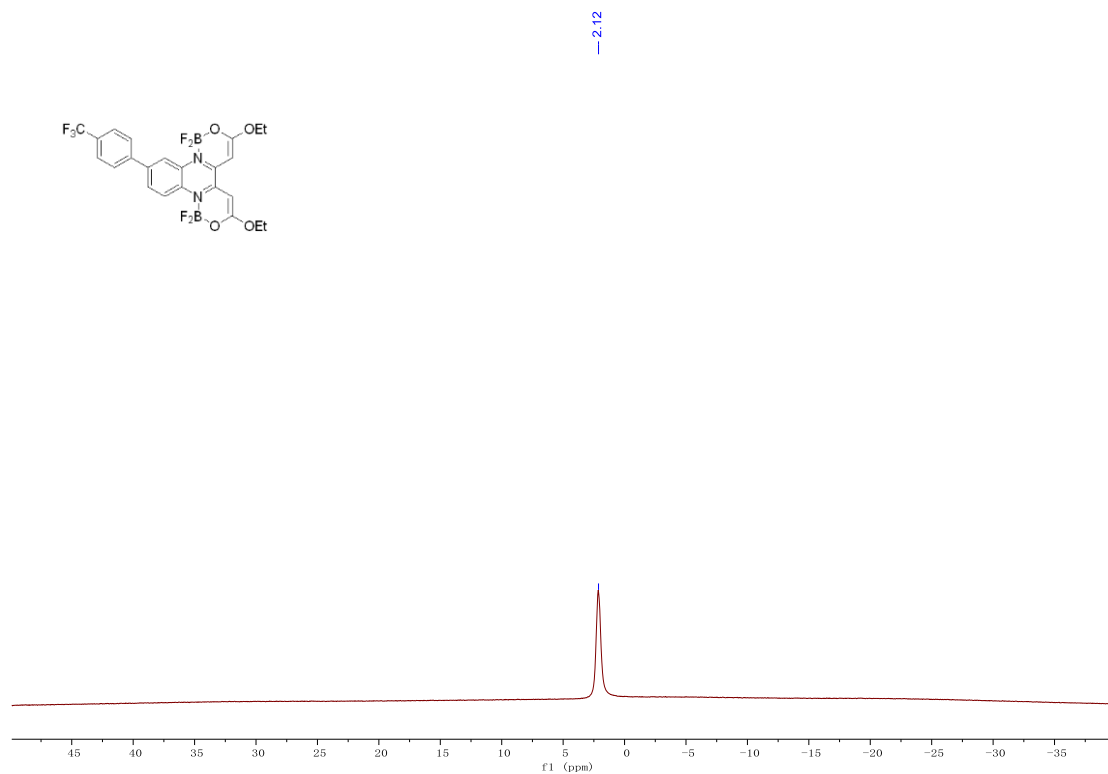

$^1\text{H}$  NMR of **3c** (400 MHz,  $\text{CDCl}_3$ )

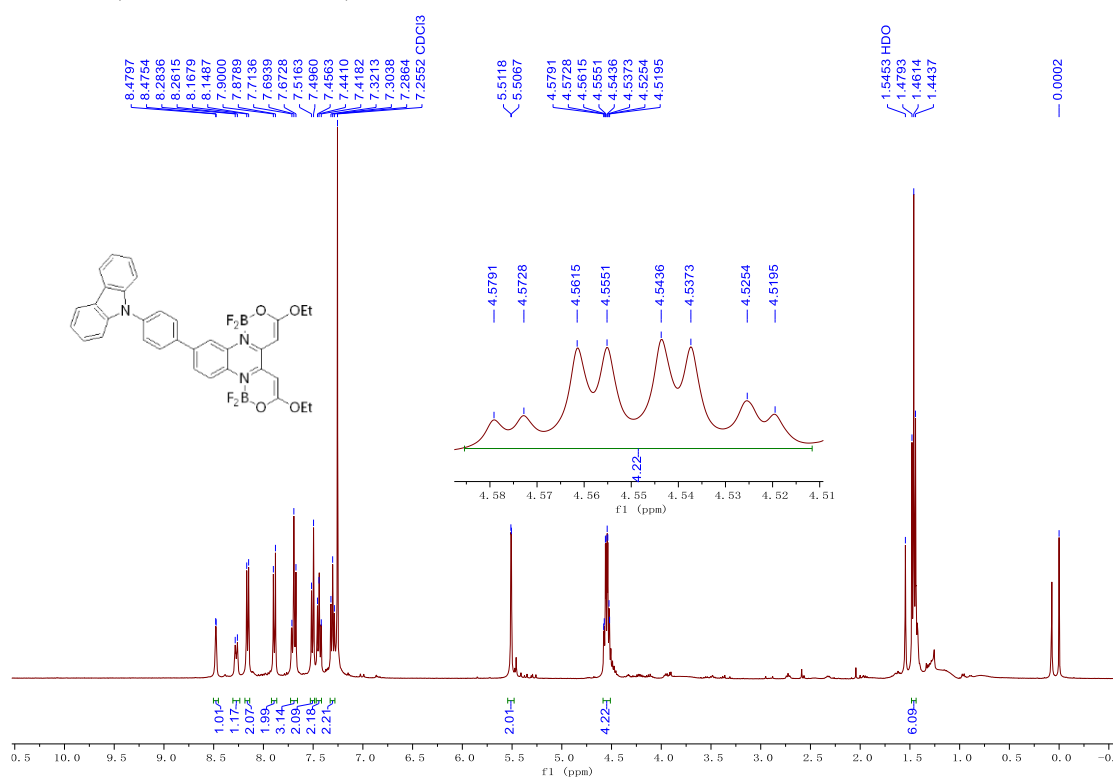

$^{13}\text{C}$  NMR of **3c** (101 MHz,  $\text{CDCl}_3$ )

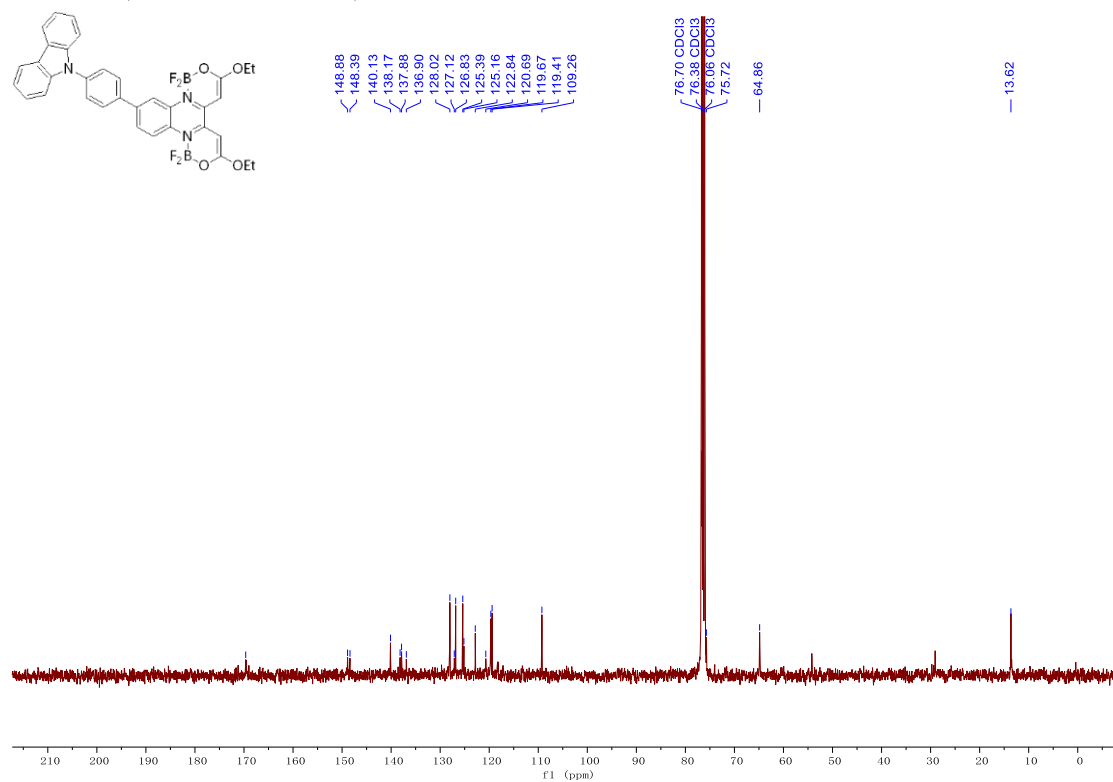

$^{19}\text{F}$  NMR of **3c** (376 MHz,  $\text{CDCl}_3$ )

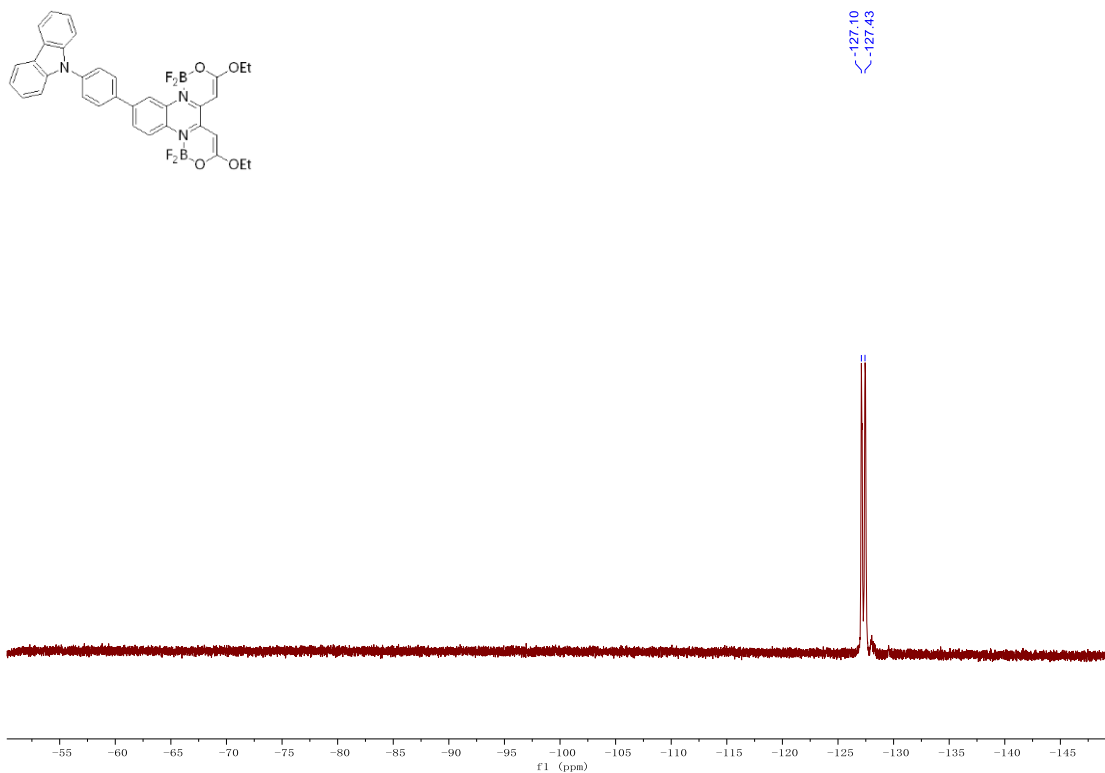

$^{11}\text{B}$  NMR of **3c** (128 MHz,  $\text{CDCl}_3$ )

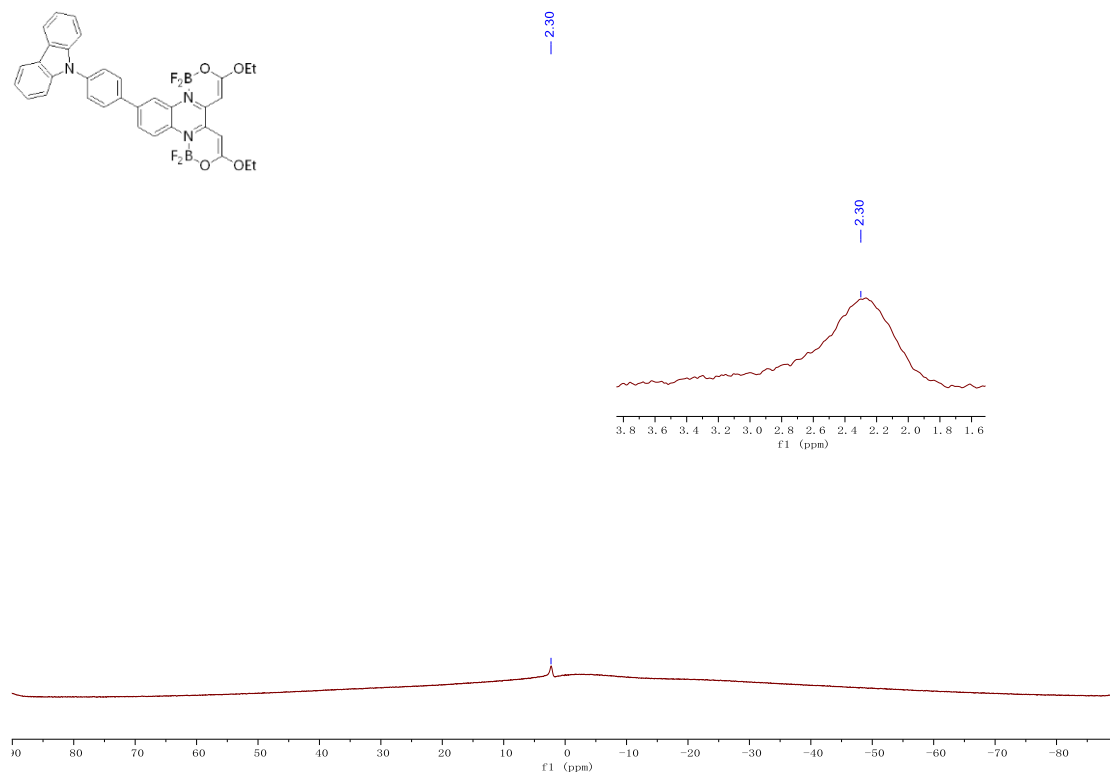

<sup>1</sup>H NMR of **3d** (400 MHz, CDCl<sub>3</sub>)

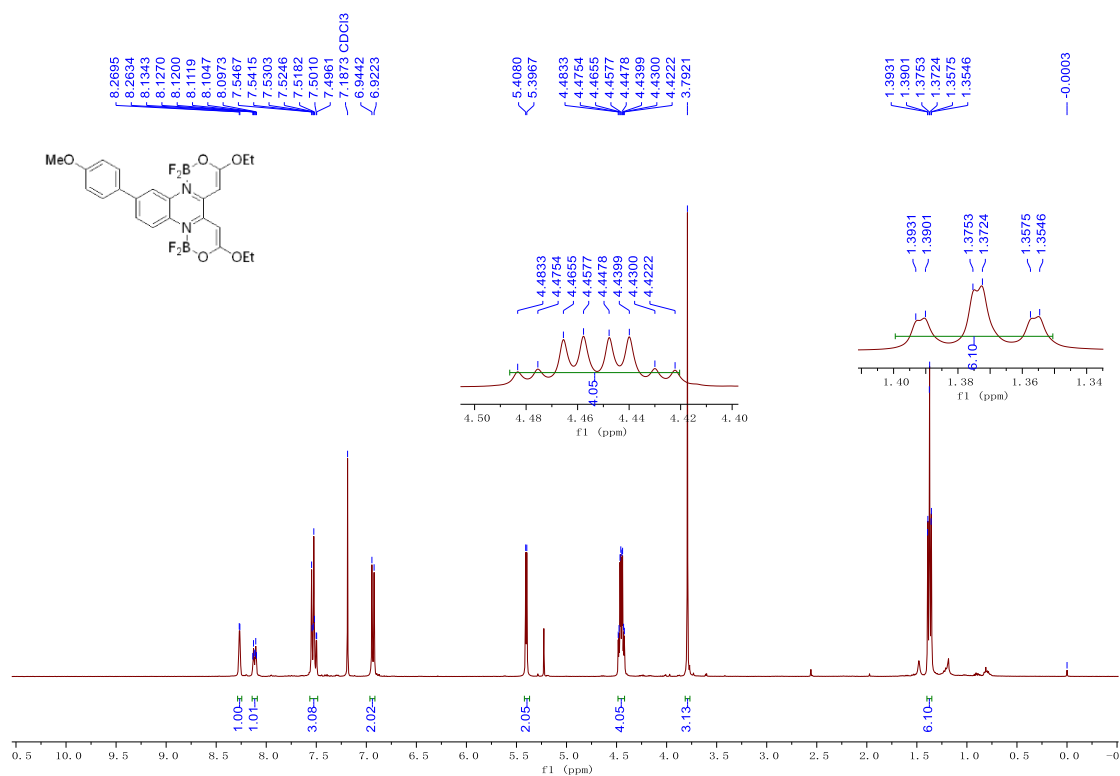

<sup>13</sup>C NMR of **3d** (101 MHz, CDCl<sub>3</sub>)

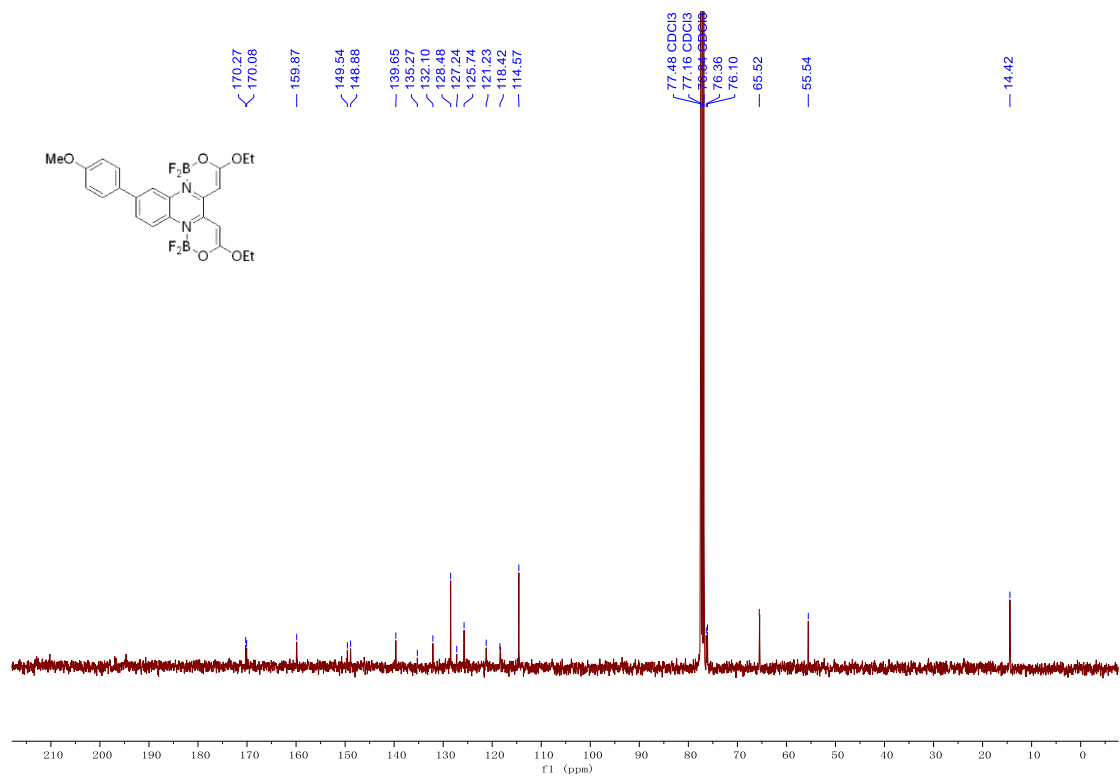

$^{19}\text{F}$  NMR of **3d** (376 MHz,  $\text{CDCl}_3$ )

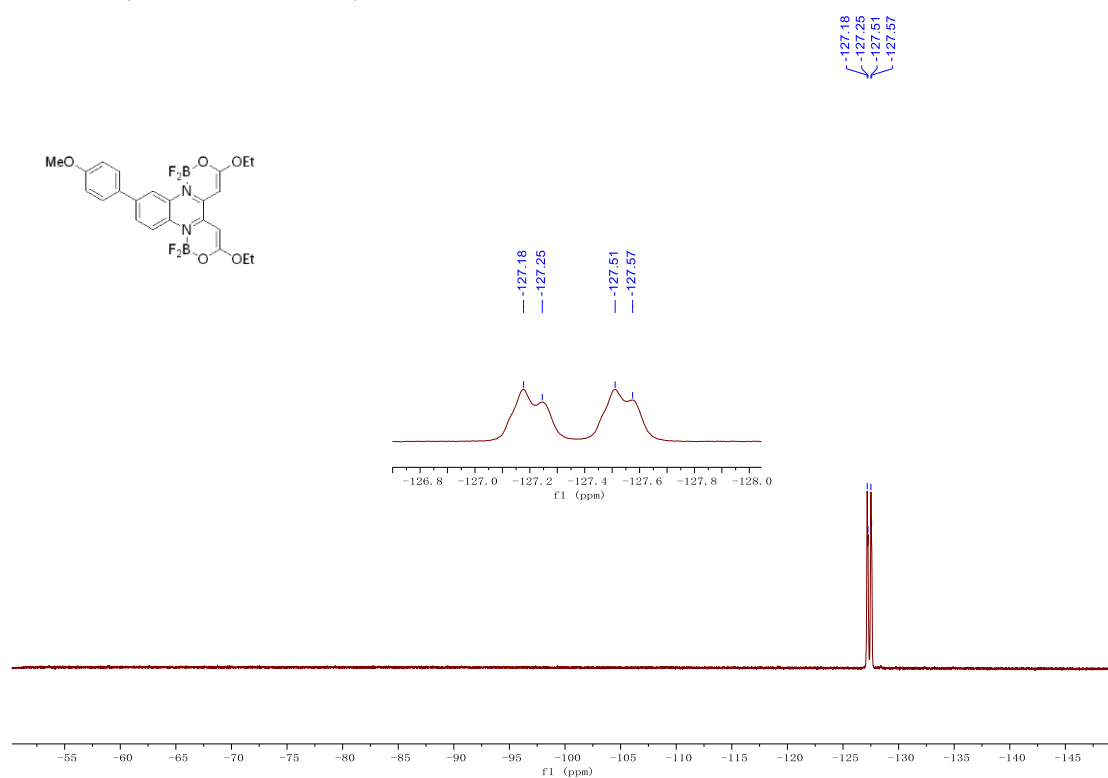

$^{11}\text{B}$  NMR of **3d** (128 MHz,  $\text{CDCl}_3$ )

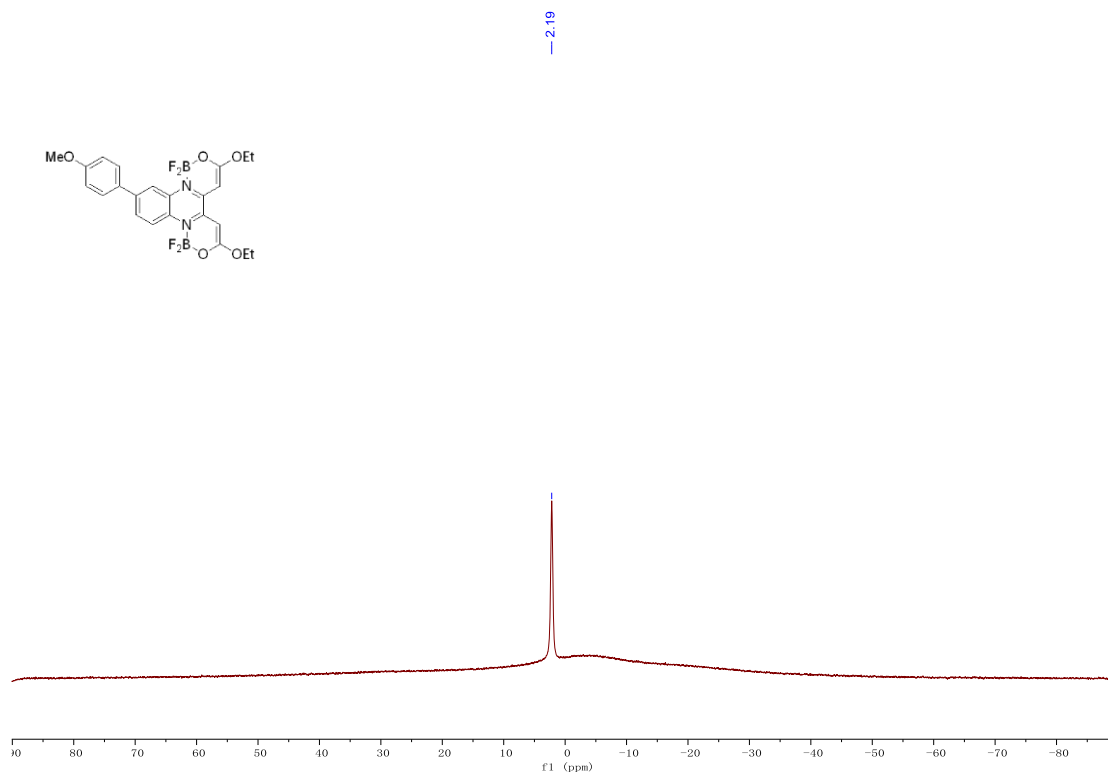

# <sup>1</sup>H NMR of **3e** (400 MHz, CDCl<sub>3</sub>)

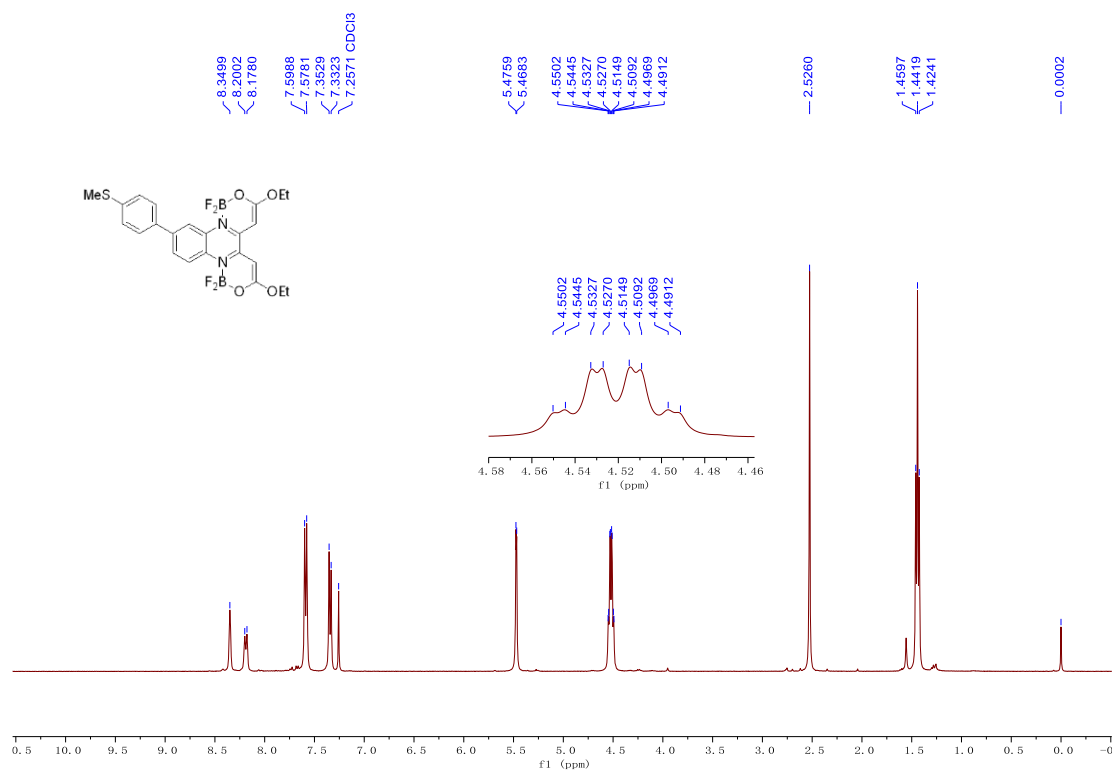

# <sup>13</sup>C NMR of **3e** (101 MHz, CDCl<sub>3</sub>)

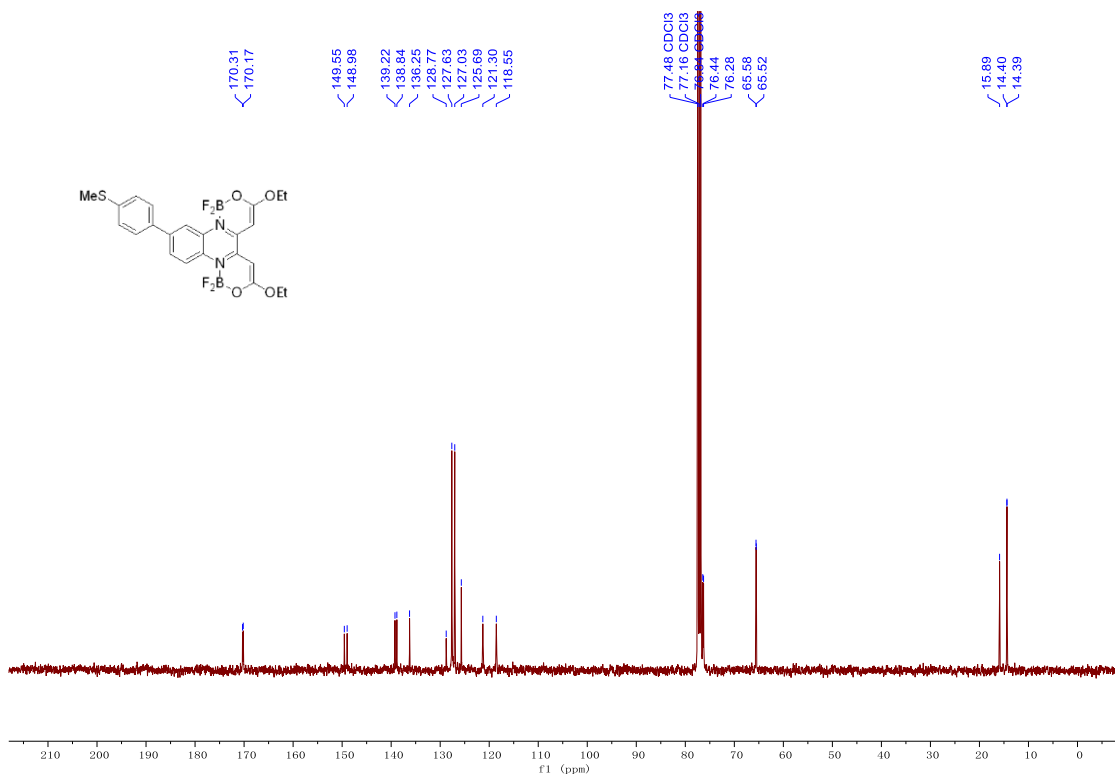



$^{19}\text{F}$  NMR of **3e** (376 MHz,  $\text{CDCl}_3$ )

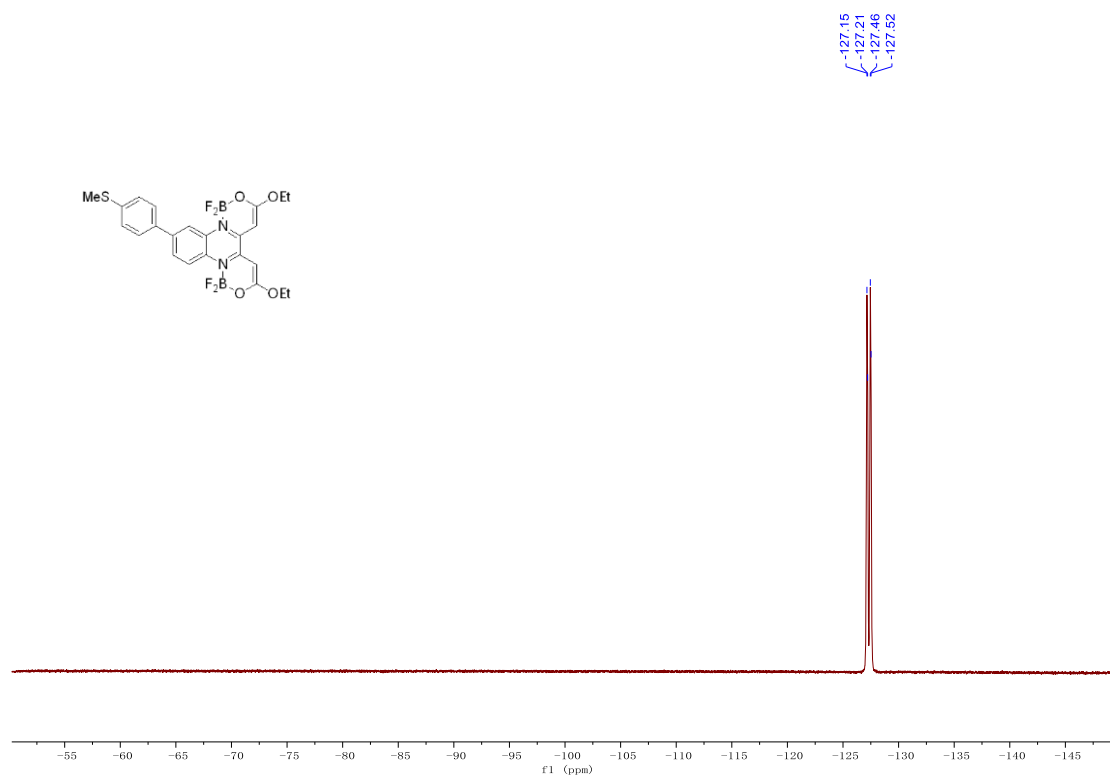

$^{11}\text{B}$  NMR of **3e** (128 MHz,  $\text{CDCl}_3$ )

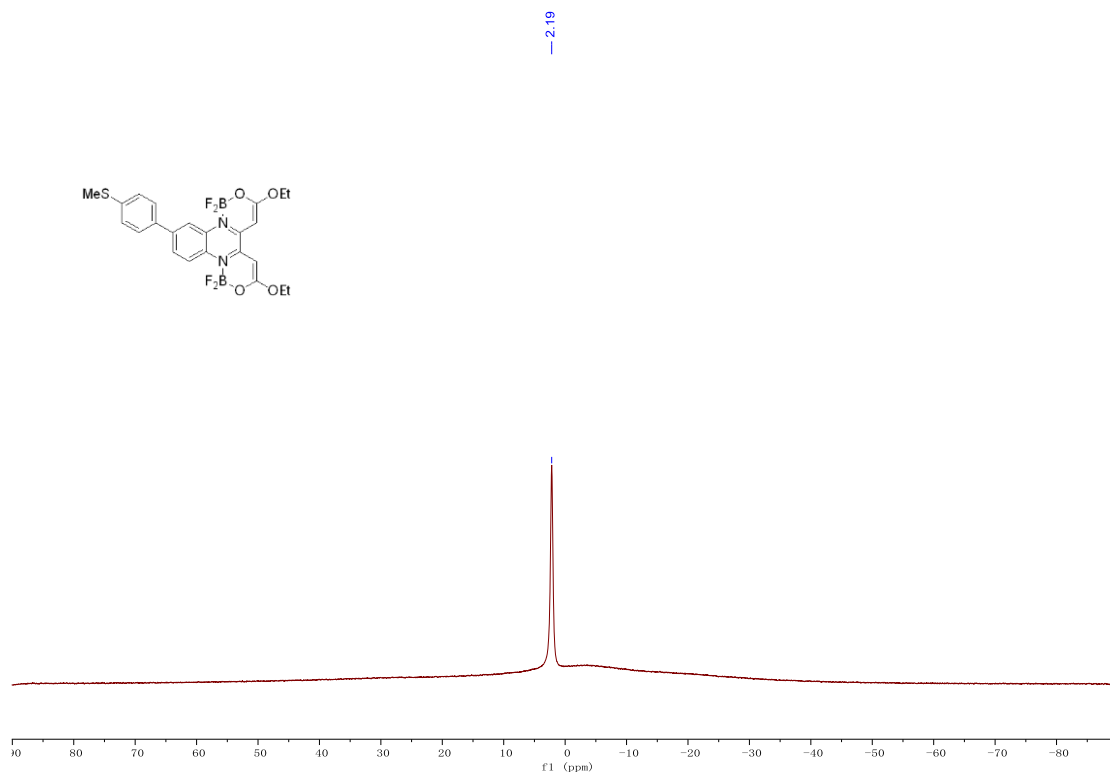

$^1\text{H}$  NMR of **3f** (400 MHz,  $\text{CDCl}_3$ )

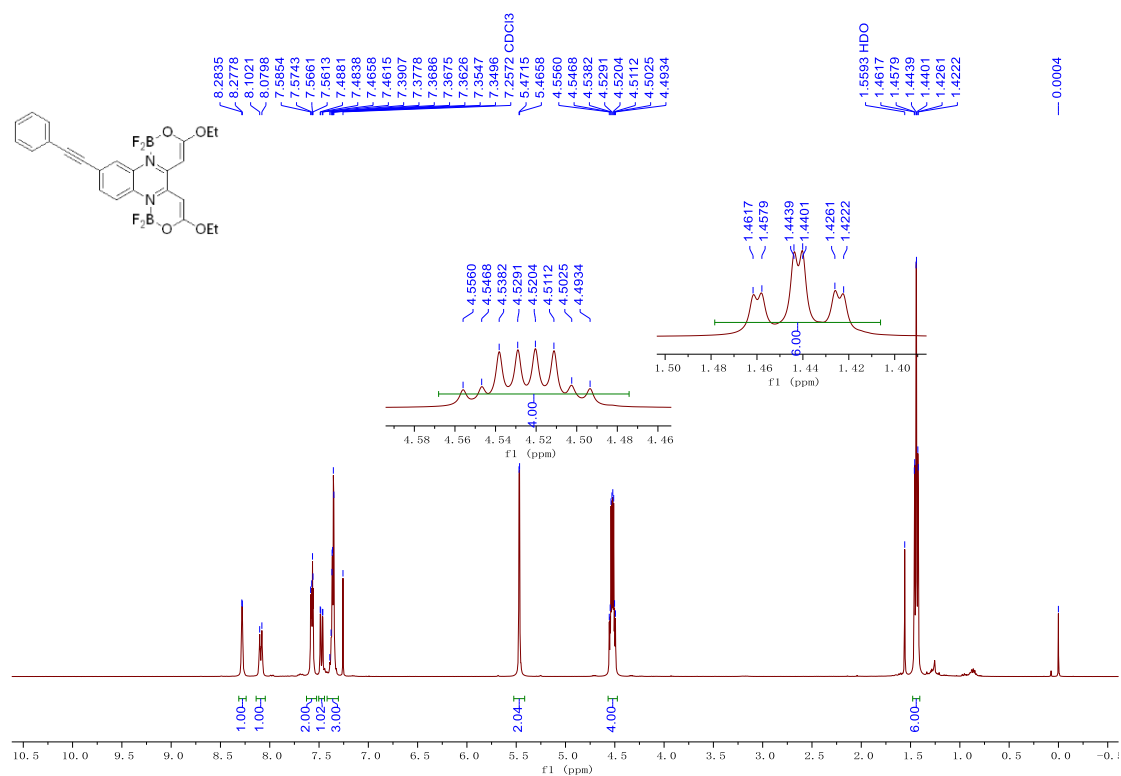

$^{13}\text{C}$  NMR of **3f** (101 MHz,  $\text{CDCl}_3$ )

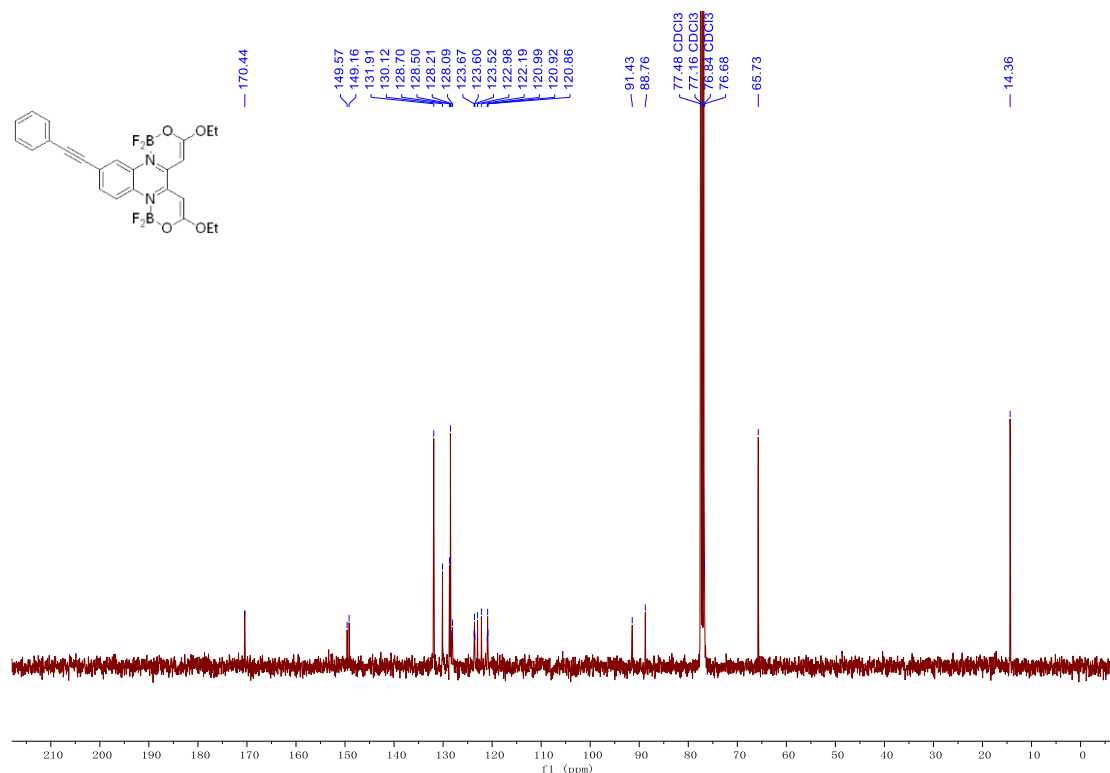

$^{19}\text{F}$  NMR of **3f** (376 MHz,  $\text{CDCl}_3$ )

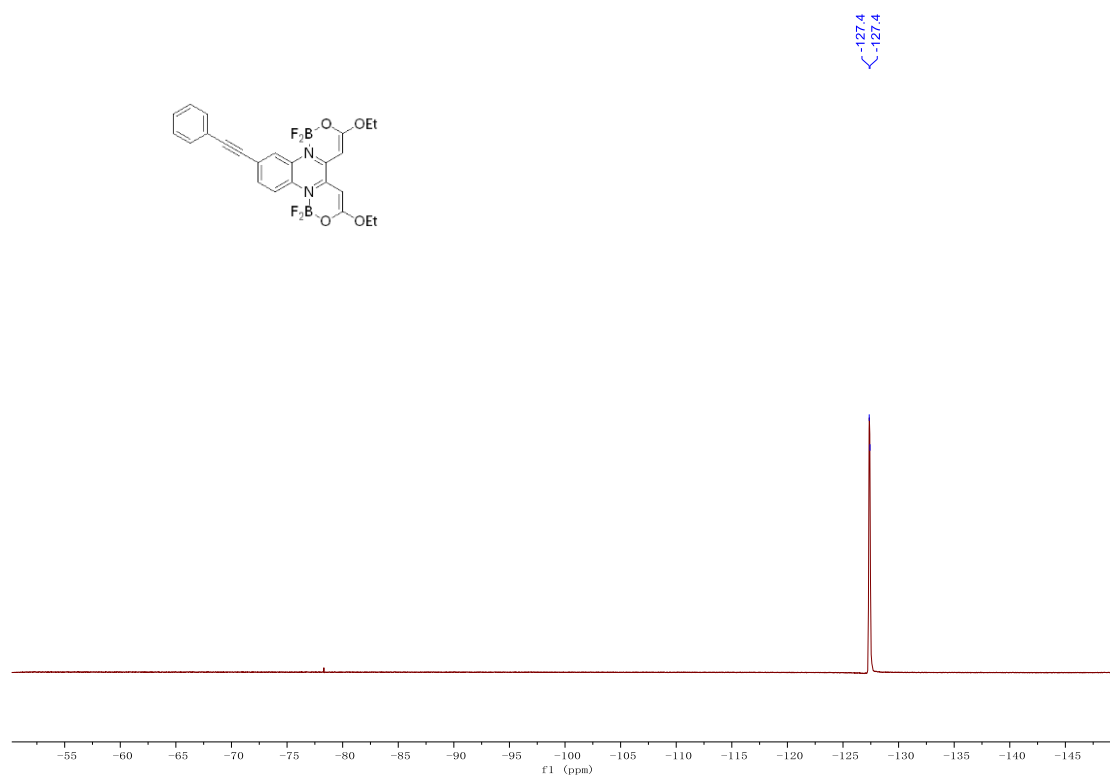

$^{11}\text{B}$  NMR of **3f** (128 MHz,  $\text{CDCl}_3$ )

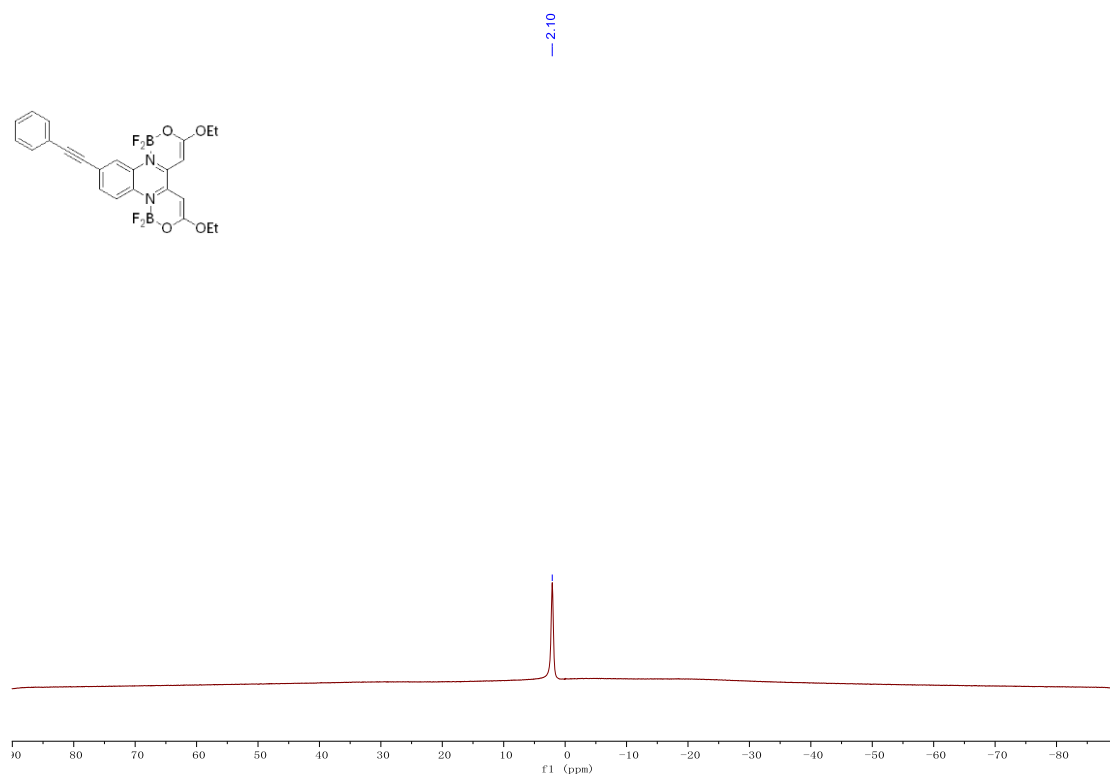

$^1\text{H}$  NMR of **3g** (400 MHz,  $\text{CDCl}_3$ )

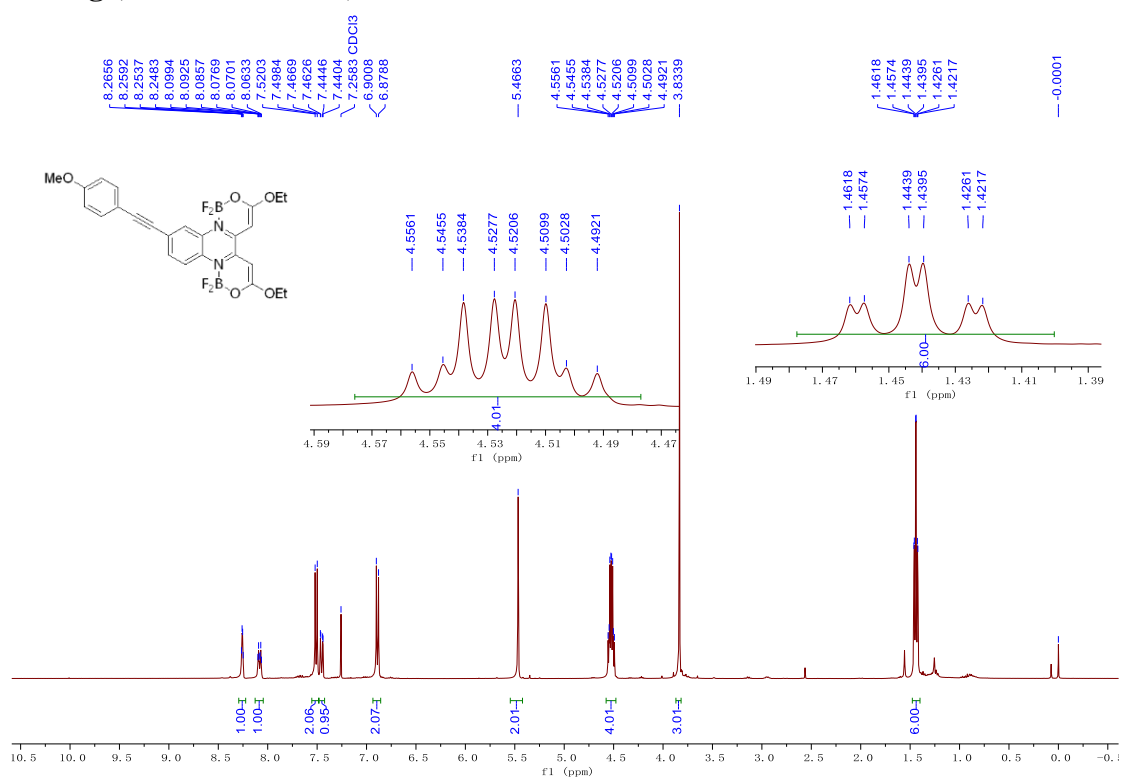

$^{13}\text{C}$  NMR of **3g** (101 MHz,  $\text{CDCl}_3$ )

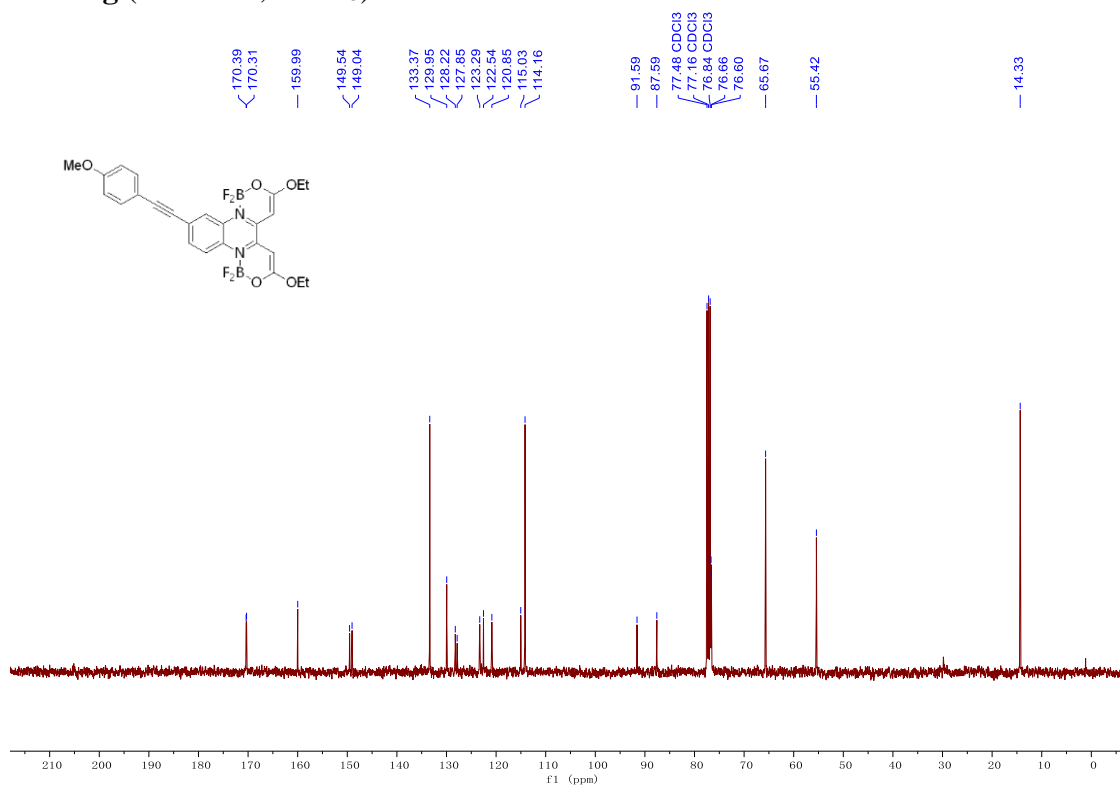

$^{19}\text{F}$  NMR of **3g** (376 MHz,  $\text{CDCl}_3$ )

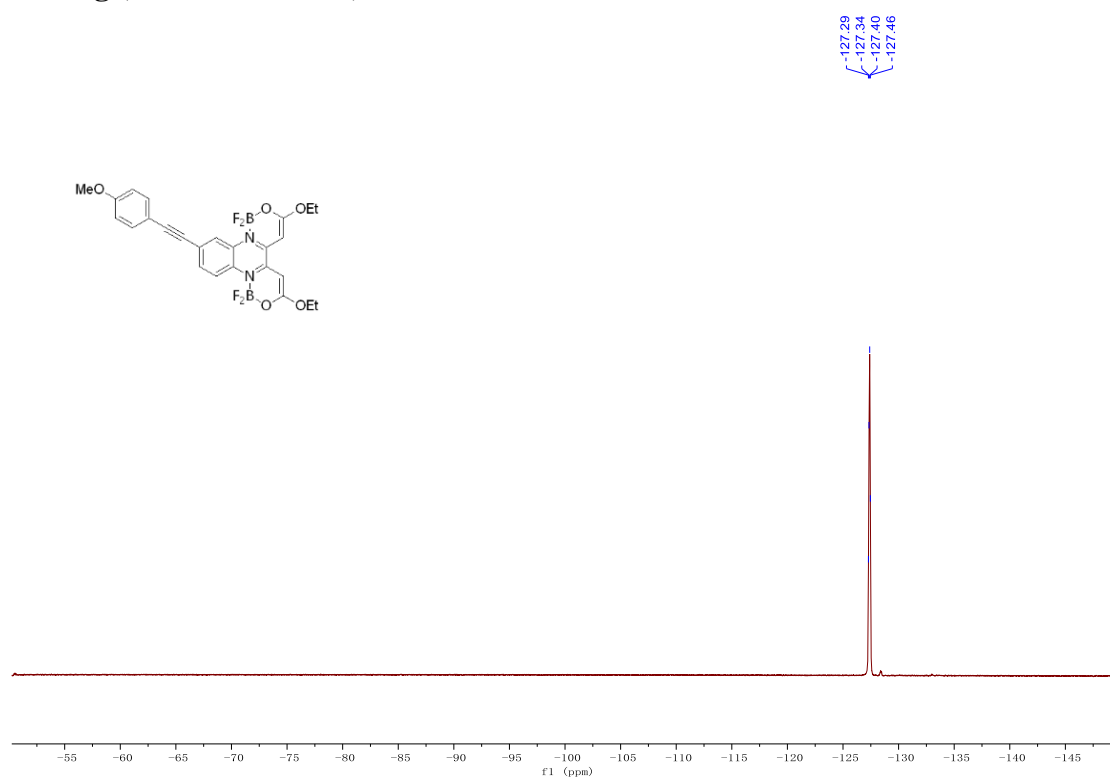

$^{11}\text{B}$  NMR of **3g** (128 MHz,  $\text{CDCl}_3$ )

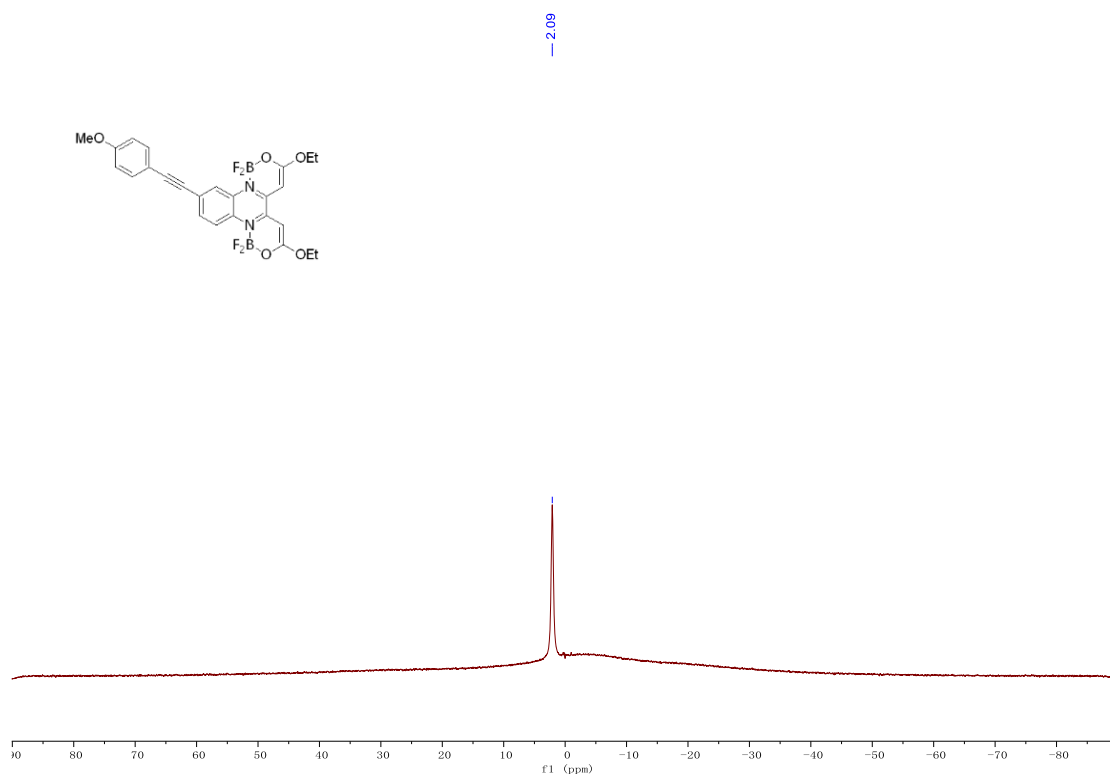

$^1\text{H}$  NMR of **3h** (400 MHz,  $\text{CDCl}_3$ )

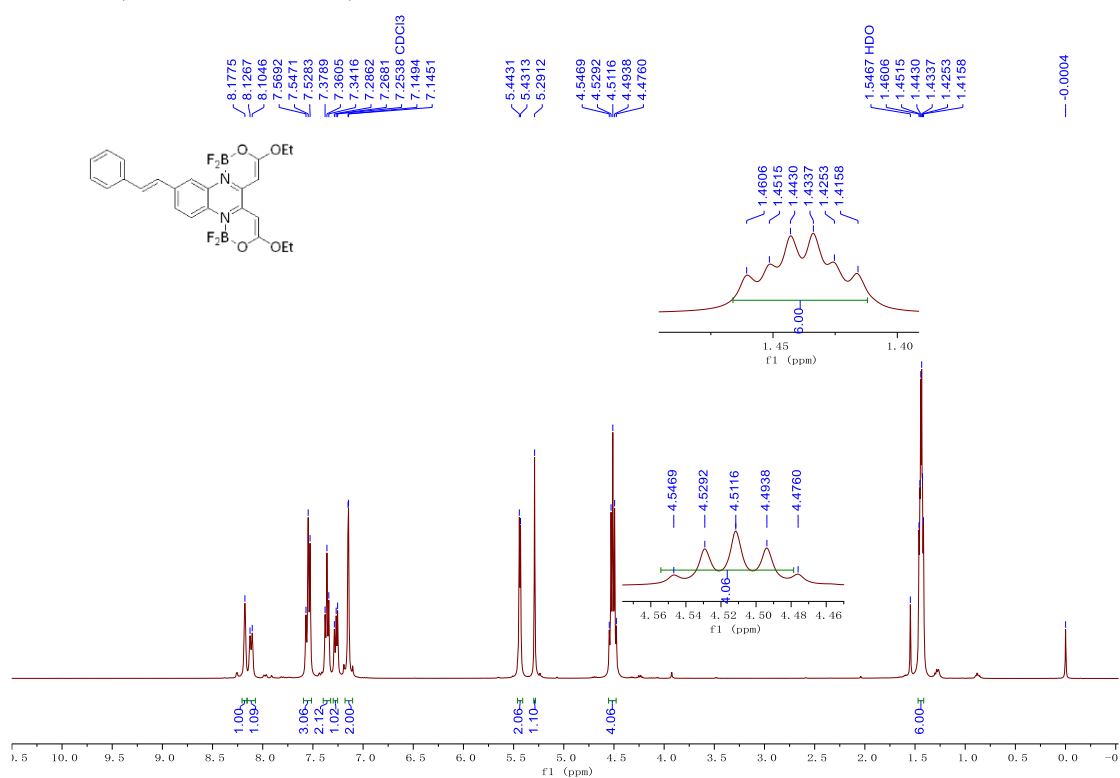

$^{13}\text{C}$  NMR of **3h** (101 MHz,  $\text{CDCl}_3$ )

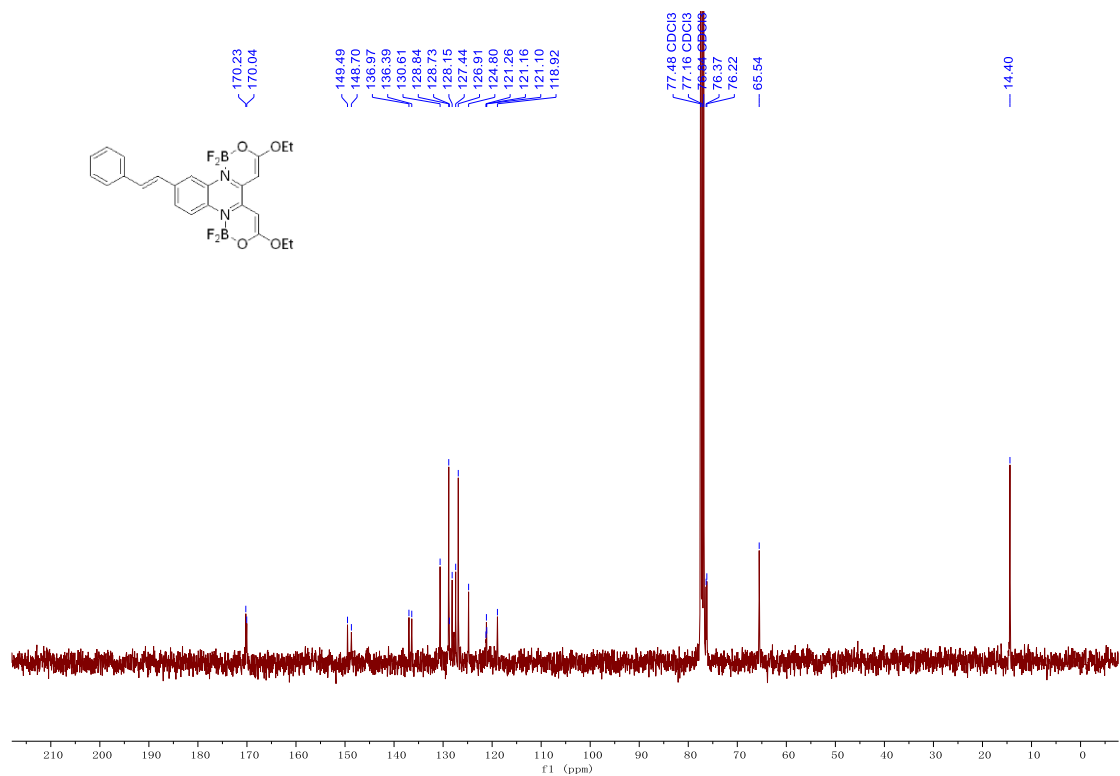

$^{19}\text{F}$  NMR of **3h** (376 MHz,  $\text{CDCl}_3$ )

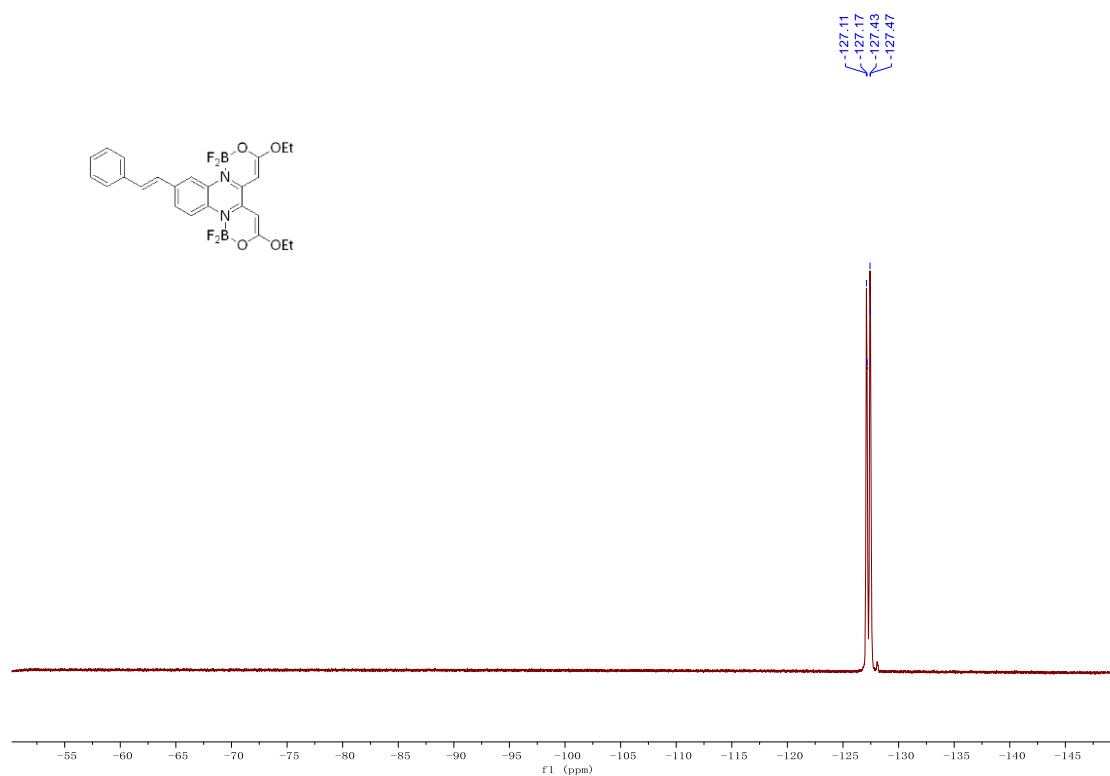

$^{11}\text{B}$  NMR of **3h** (128 MHz,  $\text{CDCl}_3$ )

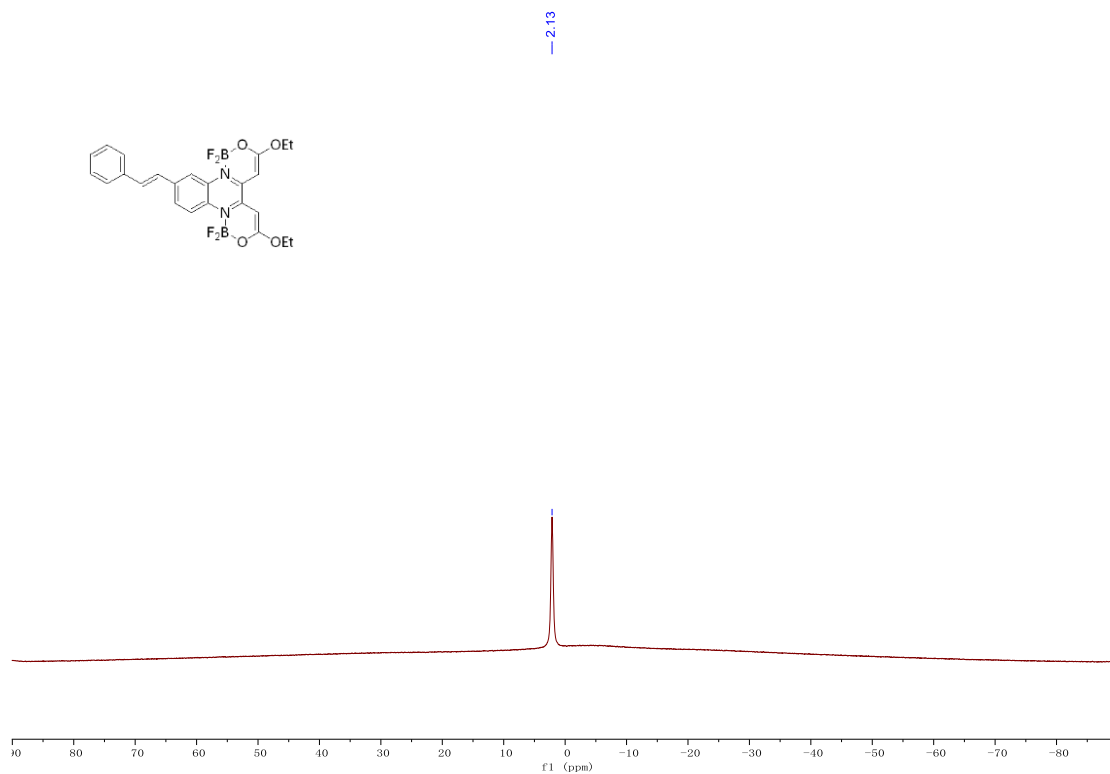

$^1\text{H}$  NMR of **3i** (400 MHz,  $\text{CDCl}_3$ )

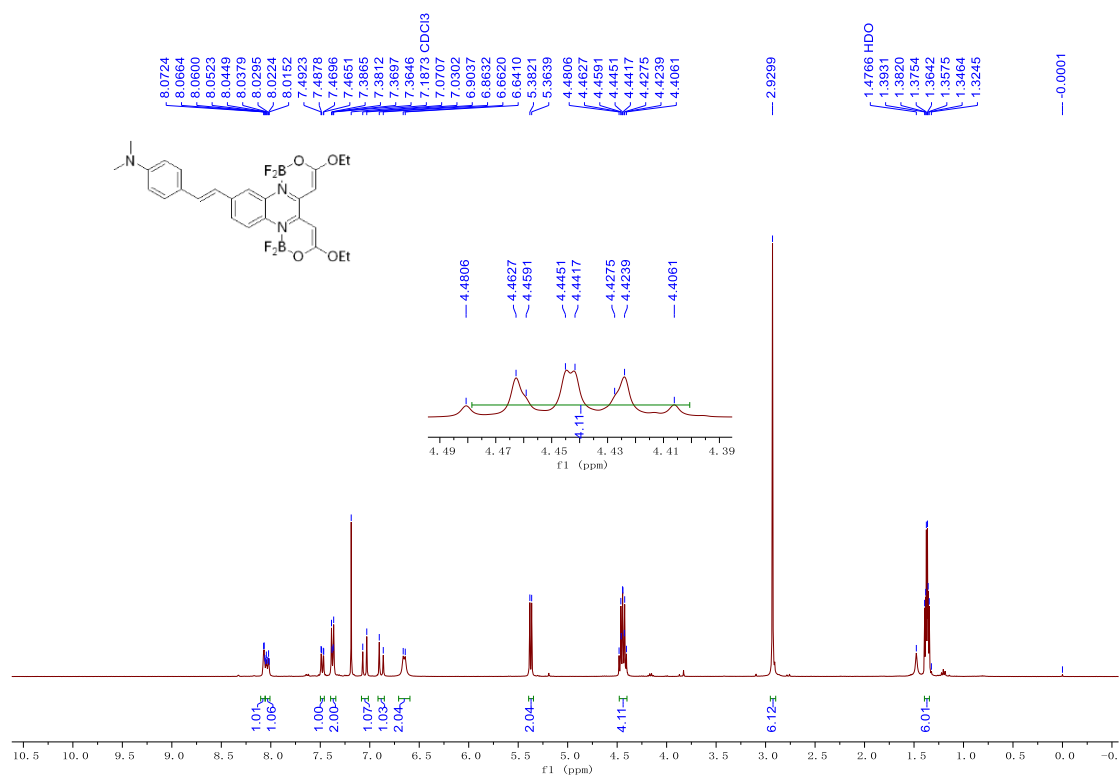

$^{13}\text{C}$  NMR of **3i** (101 MHz,  $\text{CDCl}_3$ )

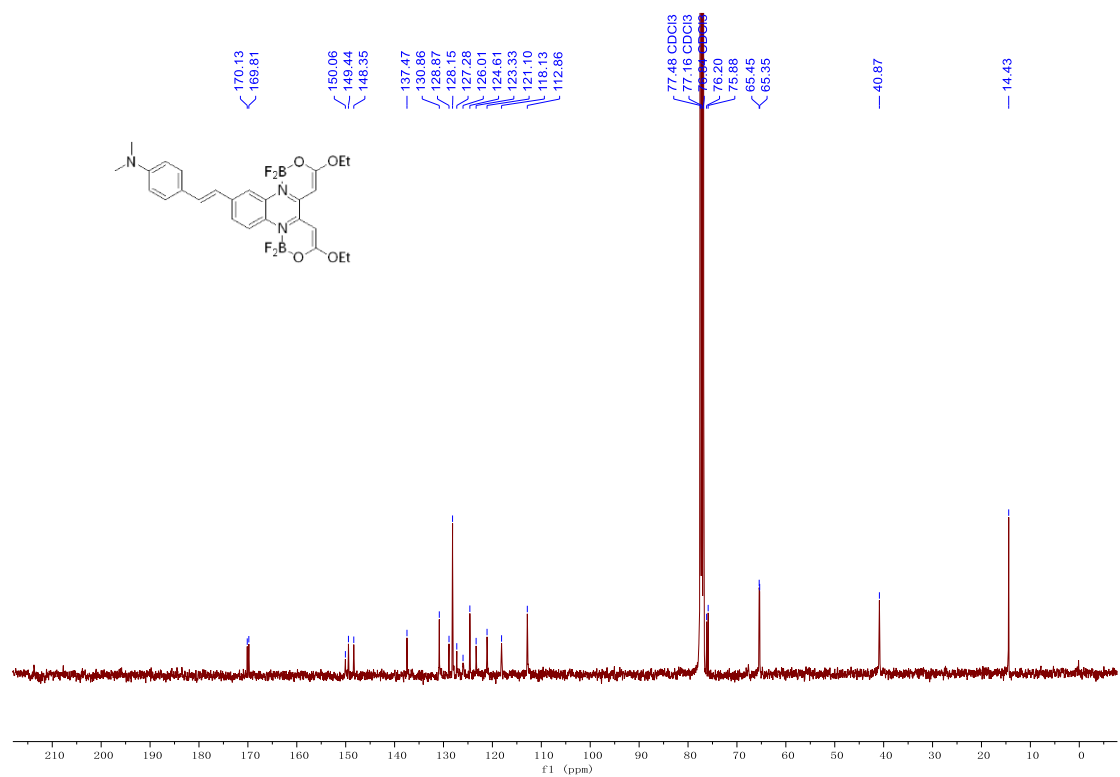



$^{19}\text{F}$  NMR of **3i** (376 MHz,  $\text{CDCl}_3$ )

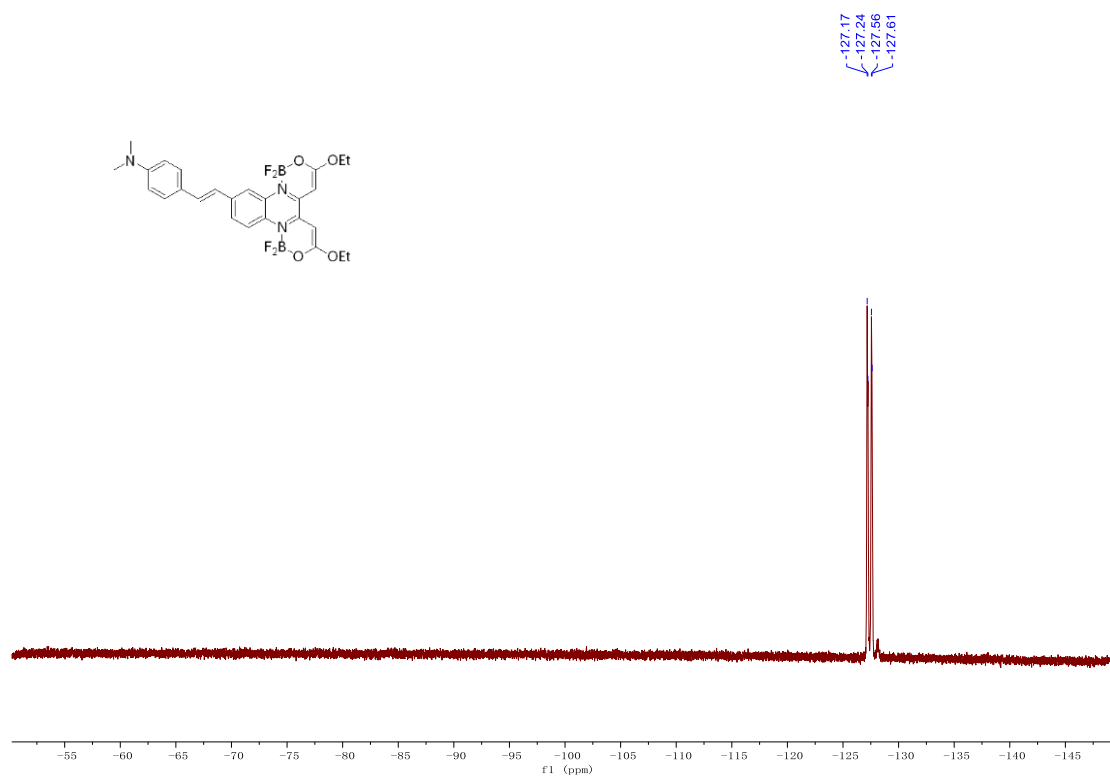

$^{11}\text{B}$  NMR of **3i** (128 MHz,  $\text{CDCl}_3$ )

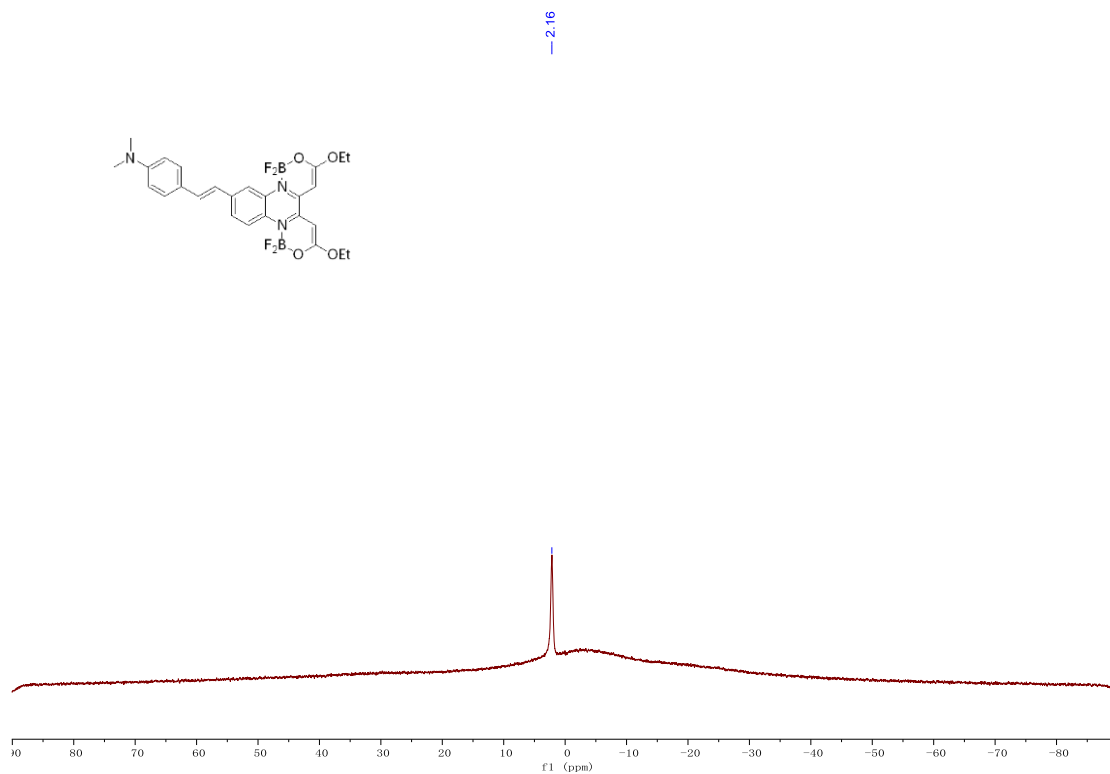

# $^1\text{H}$ NMR of **3j** (400 MHz, $\text{CDCl}_3$ )

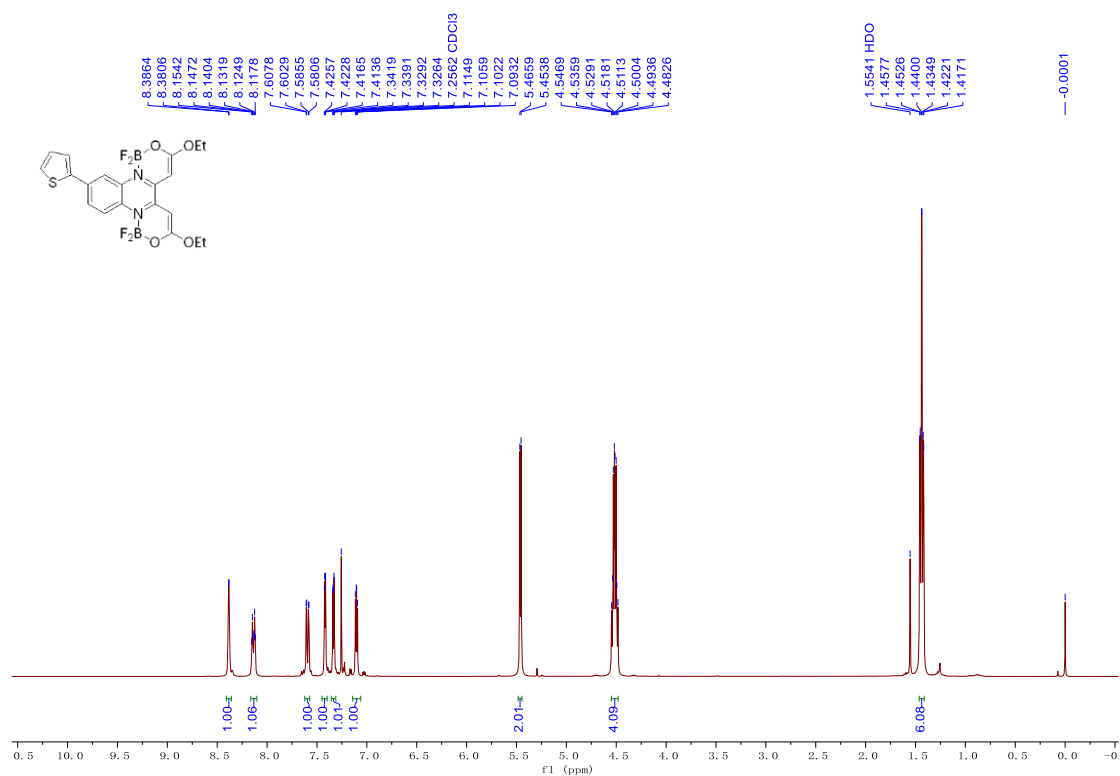

# $^{13}\text{C}$ NMR of **3j** (101 MHz, $\text{CDCl}_3$ )

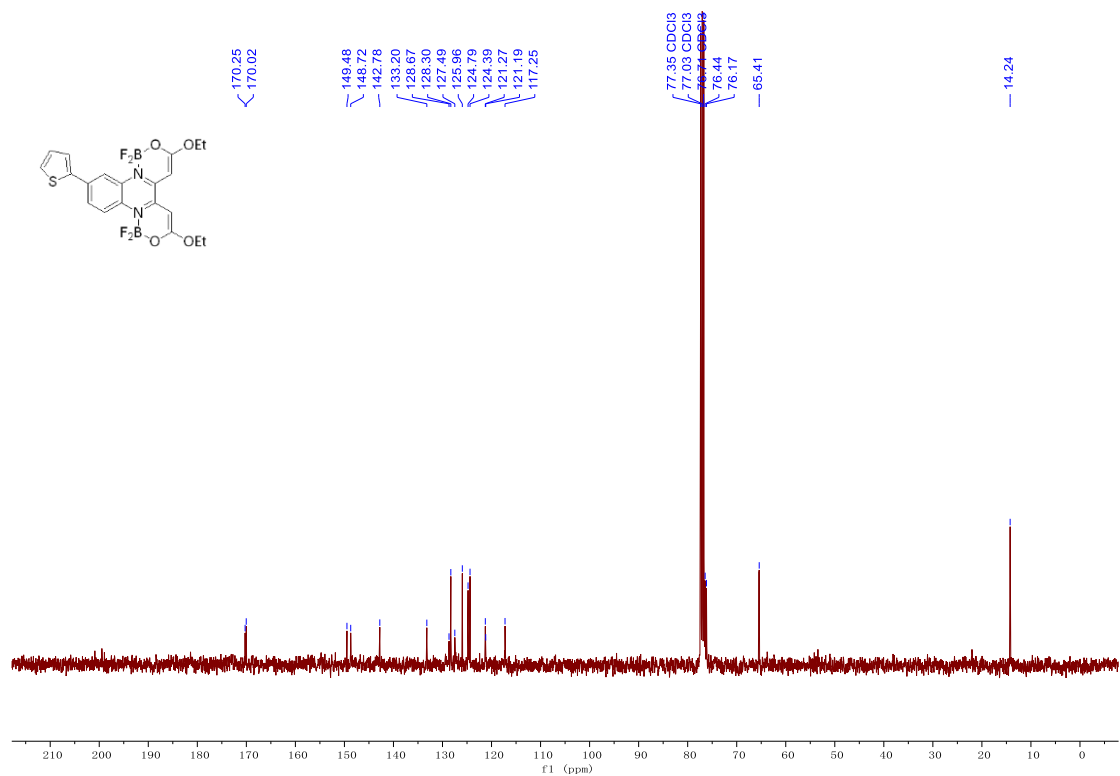

$^{19}\text{F}$  NMR of **3j** (376 MHz,  $\text{CDCl}_3$ )

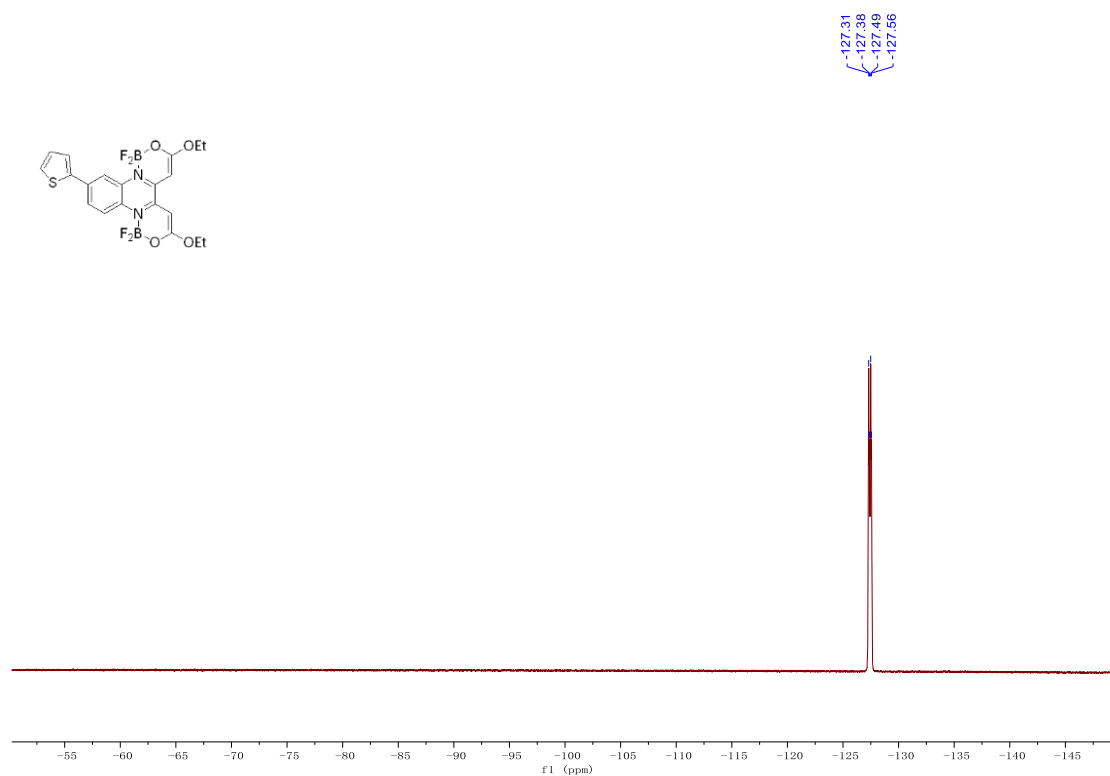

$^{11}\text{B}$  NMR of **3j** (128 MHz,  $\text{CDCl}_3$ )

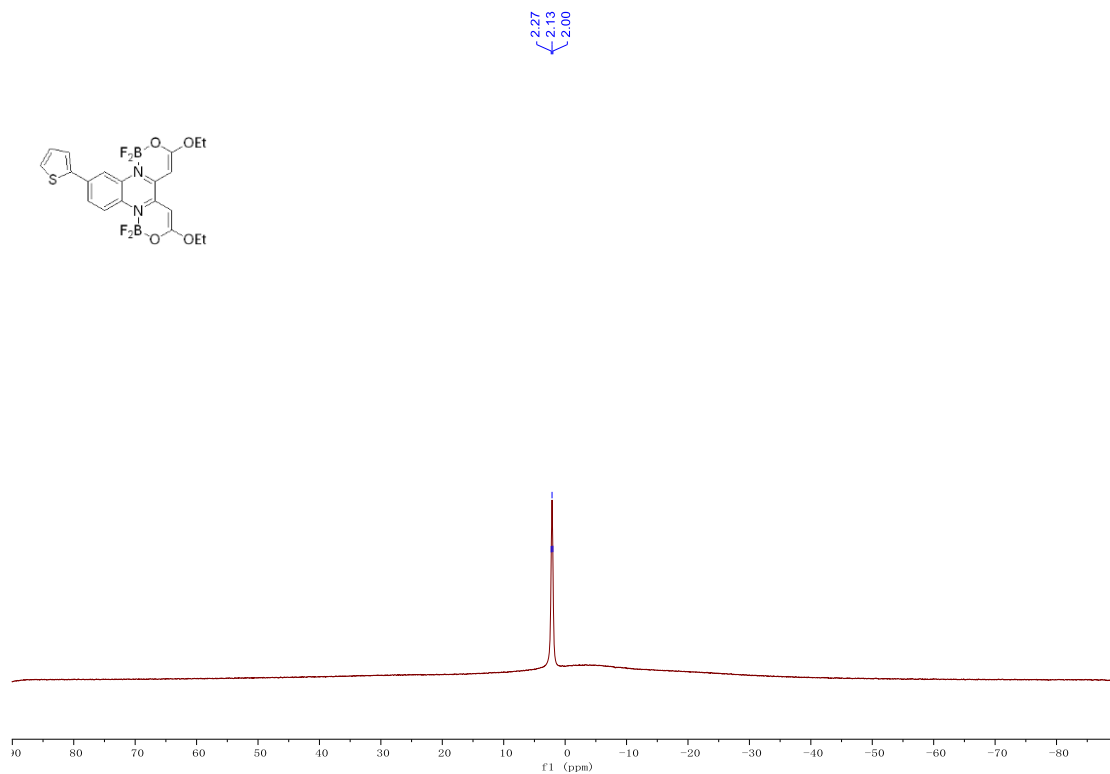

$^1\text{H}$  NMR of **3k** (400 MHz,  $\text{CDCl}_3$ )

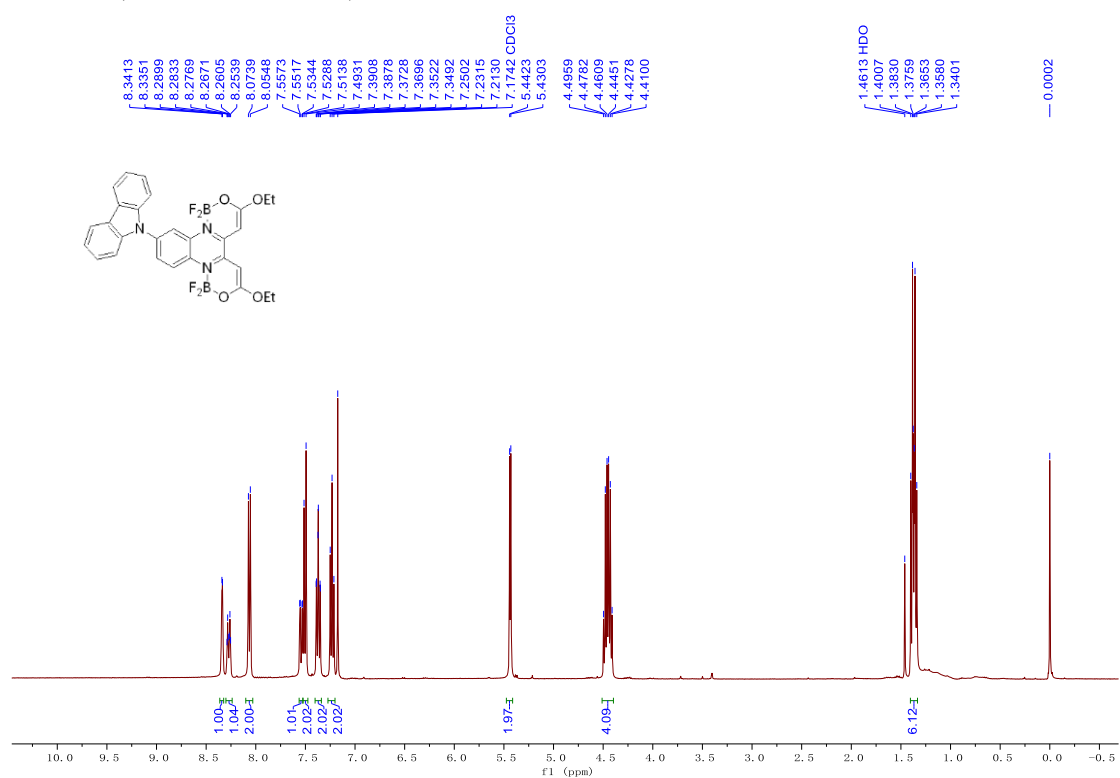

$^{13}\text{C}$  NMR of **3k** (101 MHz,  $\text{CDCl}_3$ )

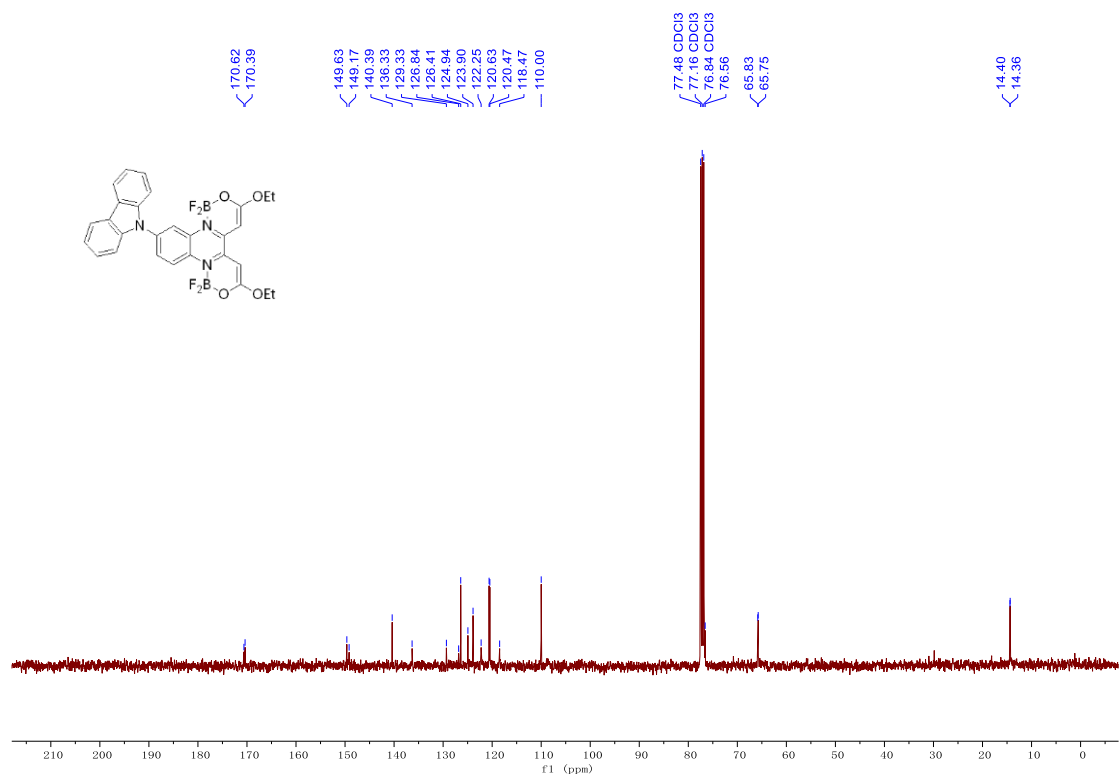

$^{19}\text{F}$  NMR of **3k** (376 MHz,  $\text{CDCl}_3$ )

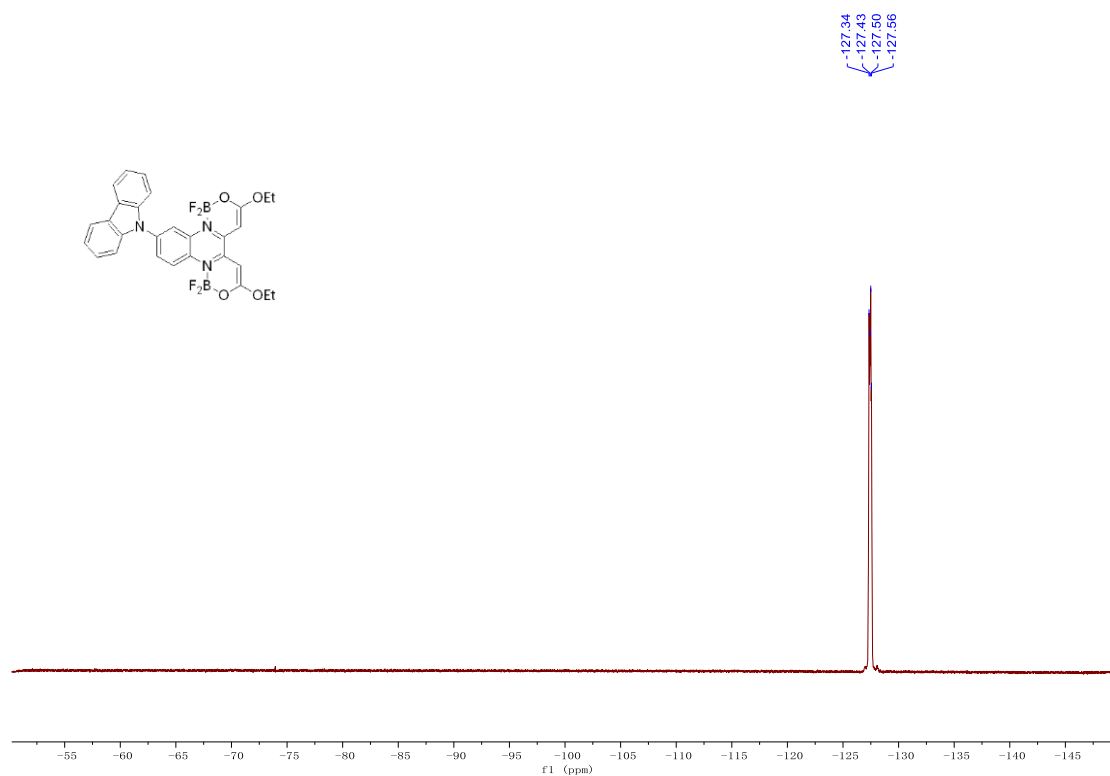

$^{11}\text{B}$  NMR of **3k** (128 MHz,  $\text{CDCl}_3$ )

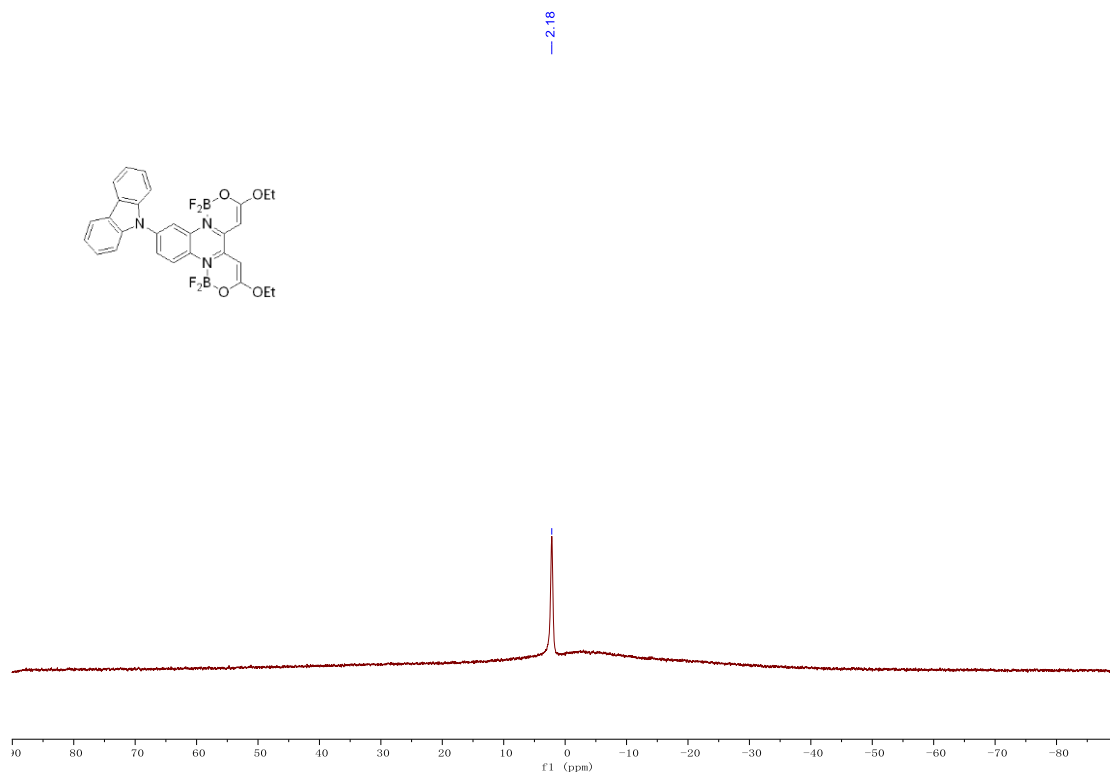

$^1\text{H}$  NMR of **4a** (400 MHz,  $\text{CDCl}_3$ )

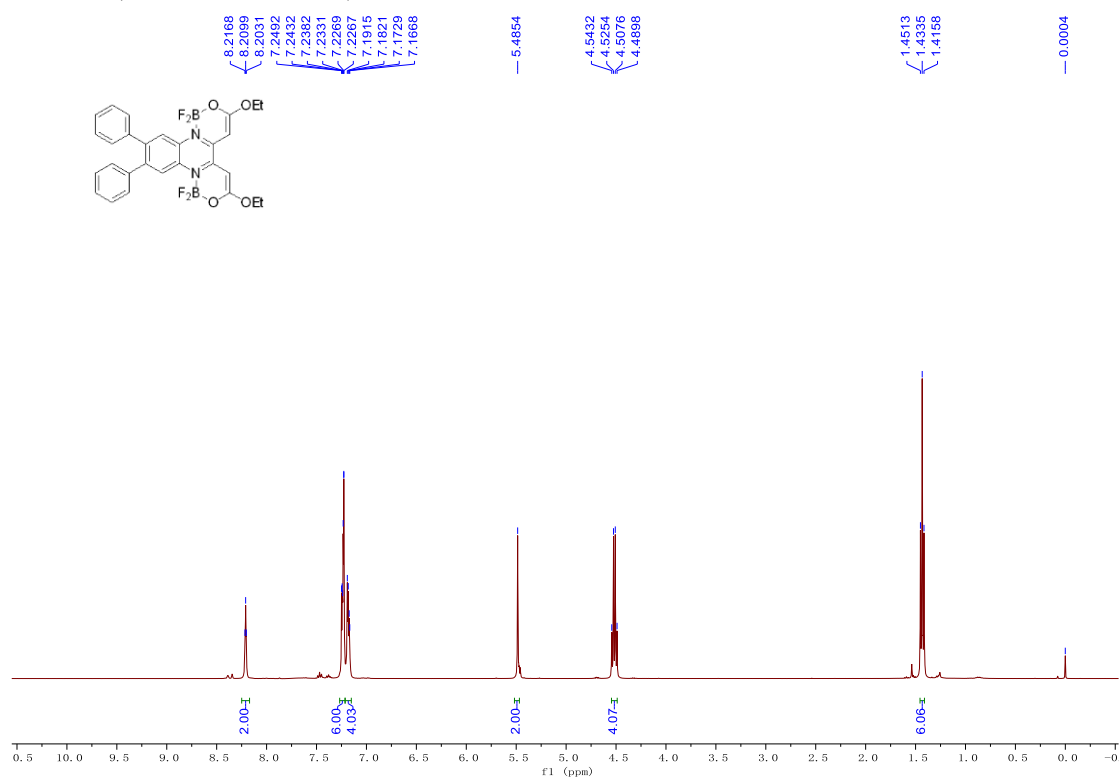

$^{13}\text{C}$  NMR of **4a** (101 MHz,  $\text{CDCl}_3$ )

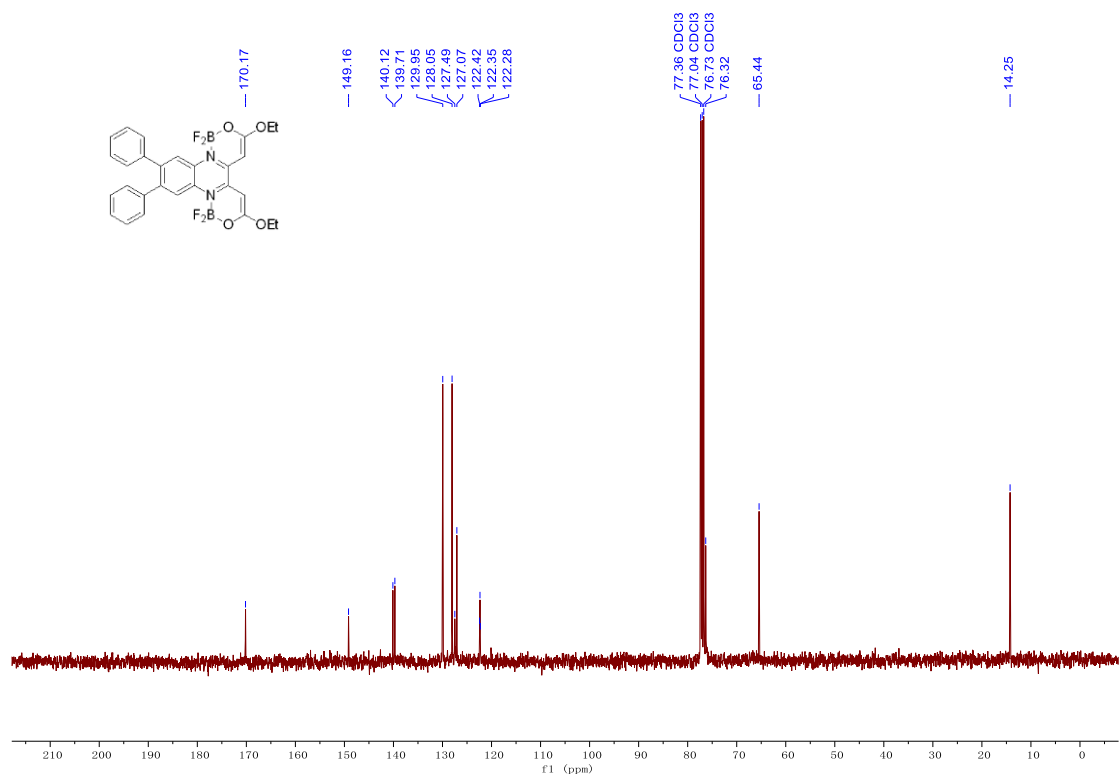

$^{19}\text{F}$  NMR of **4a** (376 MHz,  $\text{CDCl}_3$ )

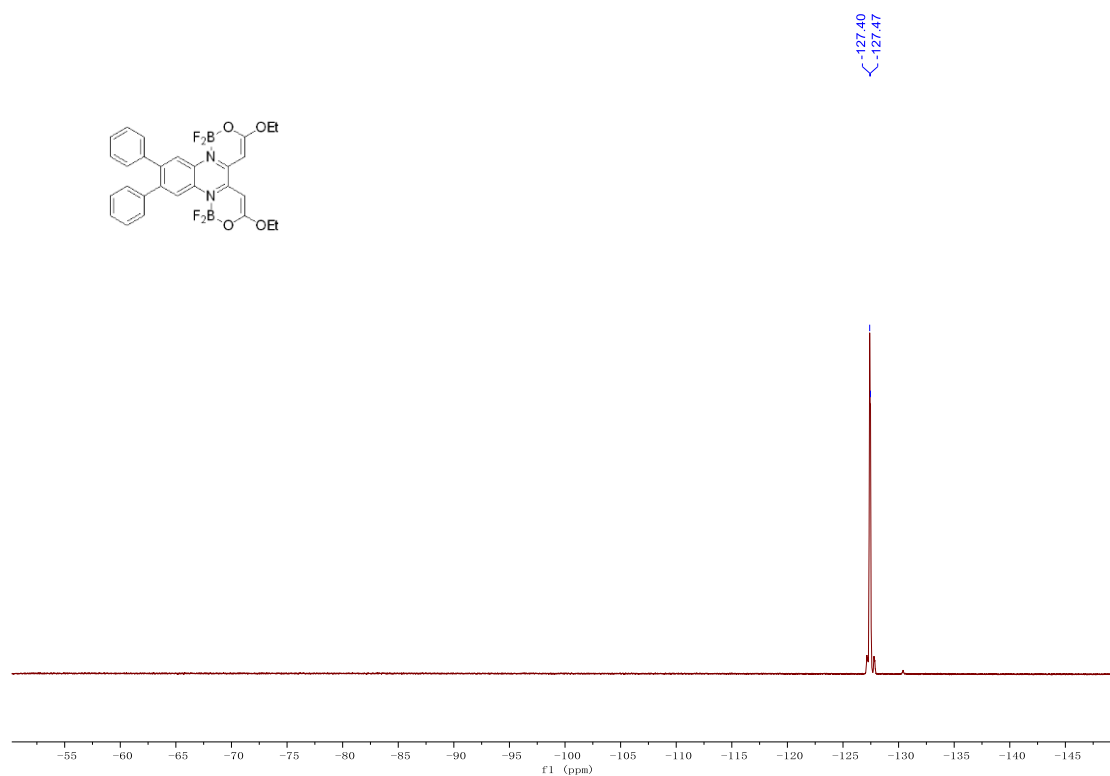

$^{11}\text{B}$  NMR of **4a** (128 MHz,  $\text{CDCl}_3$ )

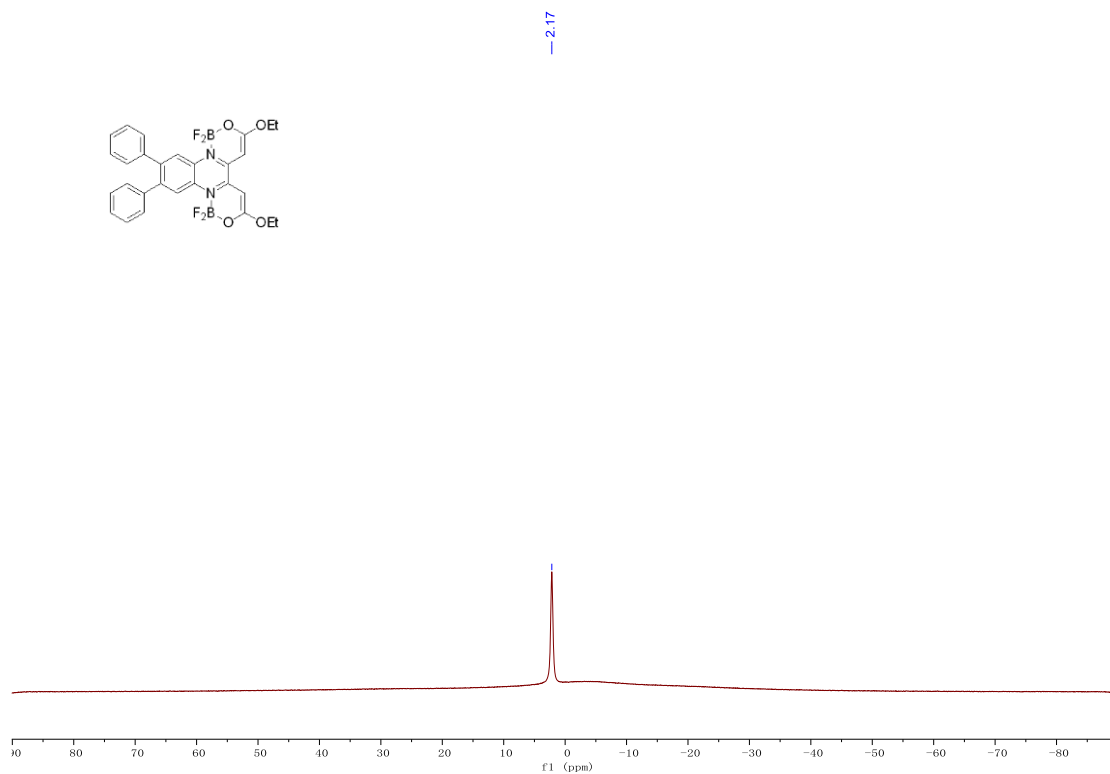

$^1\text{H}$  NMR of **4b** (400 MHz,  $\text{CDCl}_3$ )

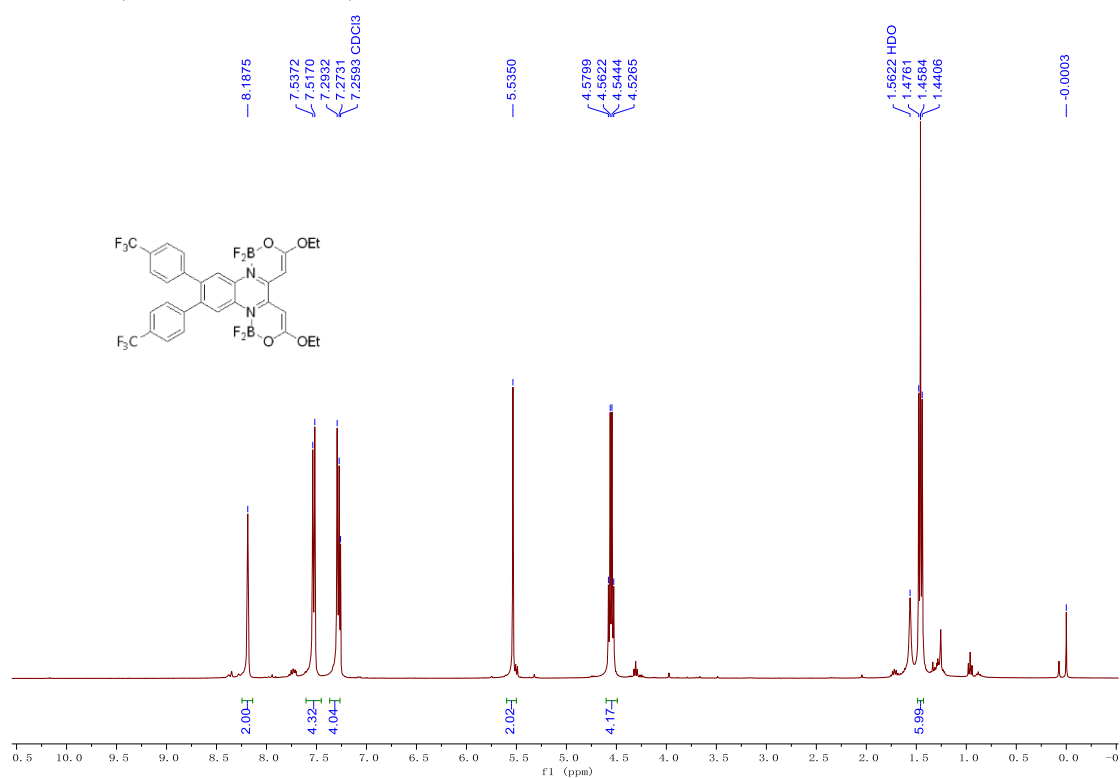

$^{13}\text{C}$  NMR of **4b** (101 MHz,  $\text{CDCl}_3$ )

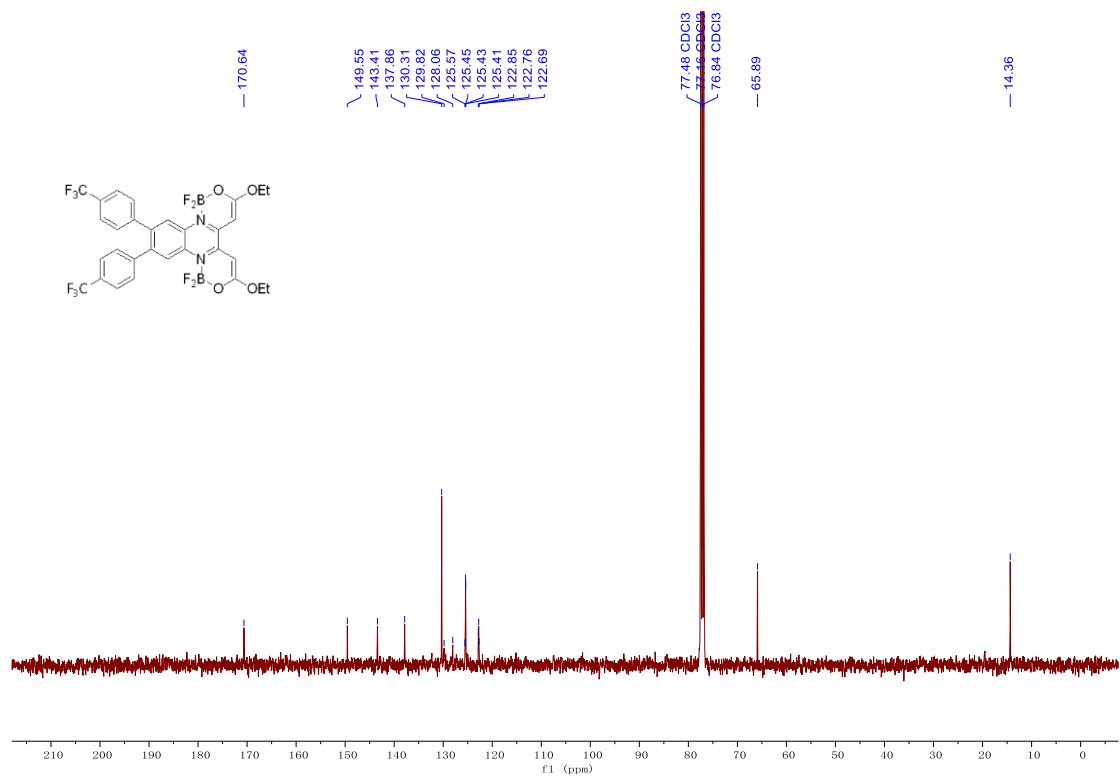



$^{19}\text{F}$  NMR of **4b** (376 MHz,  $\text{CDCl}_3$ )

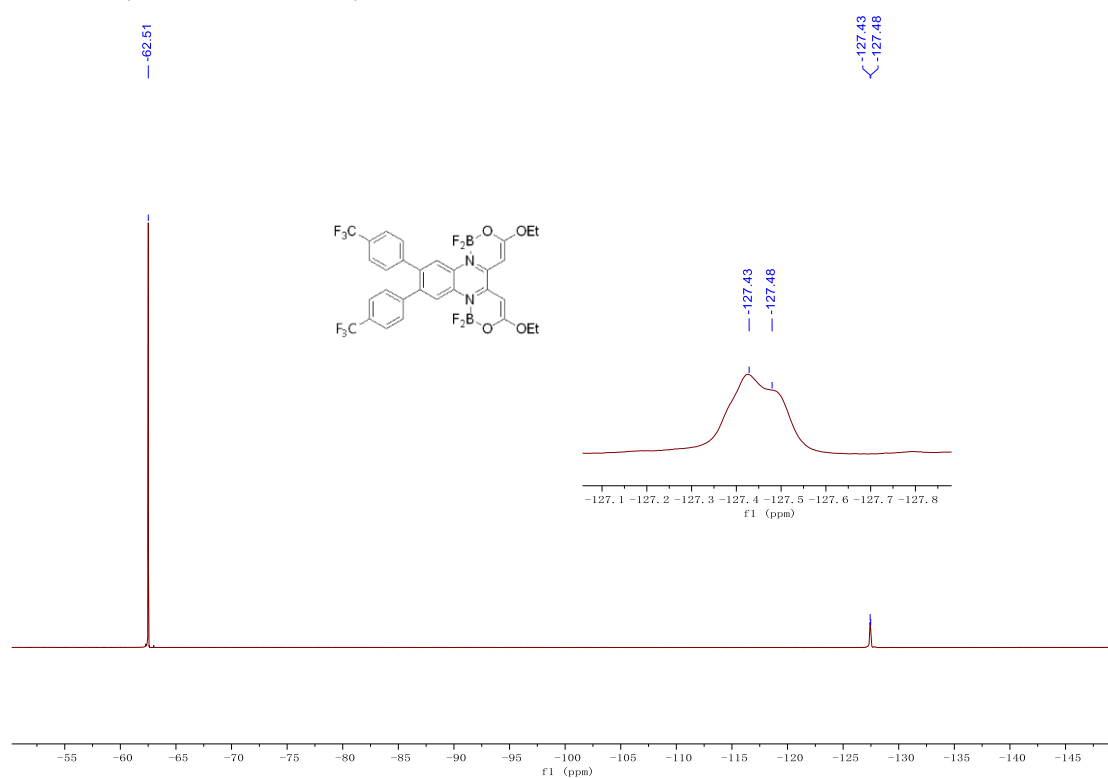

$^{11}\text{B}$  NMR of **4b** (128 MHz,  $\text{CDCl}_3$ )

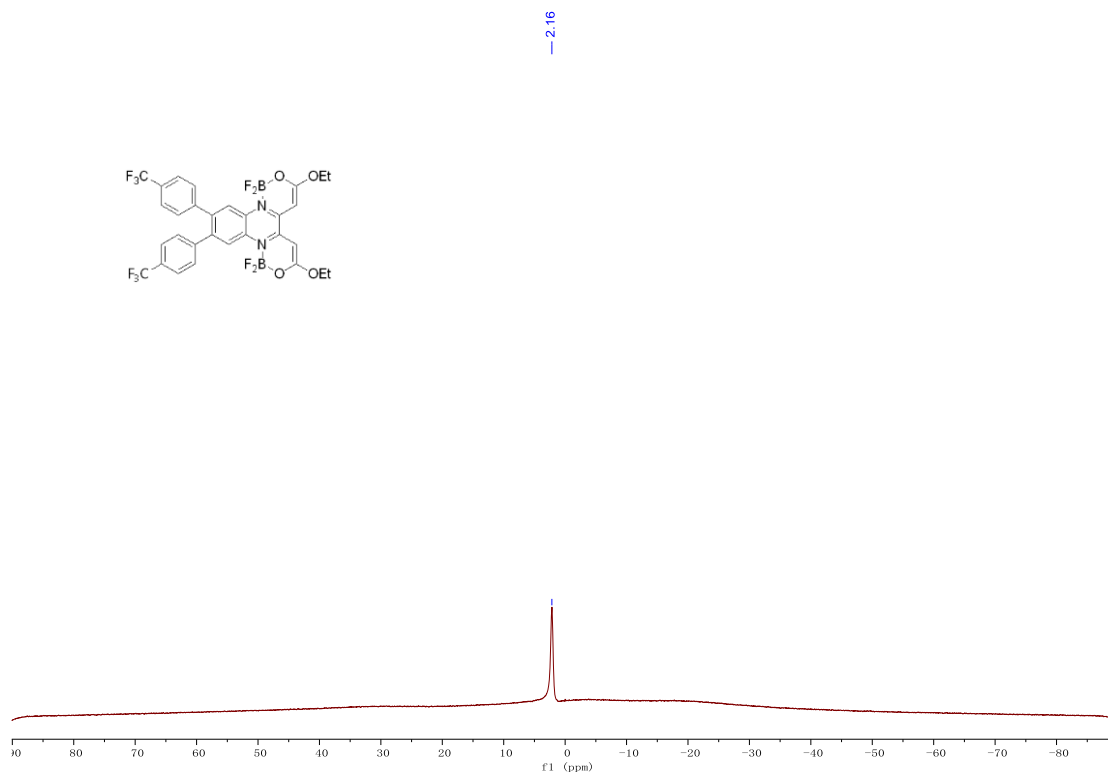

$^1\text{H}$  NMR of **4c** (400 MHz,  $\text{CDCl}_3$ )

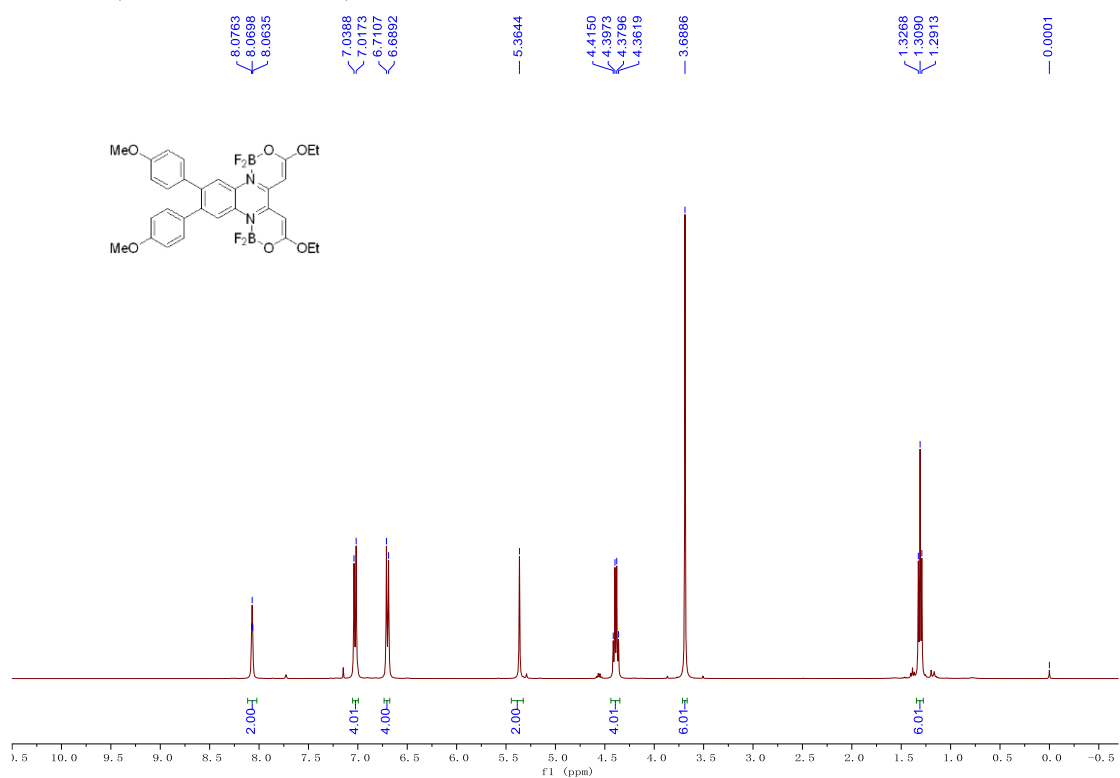

$^{13}\text{C}$  NMR of **4c** (101 MHz,  $\text{CDCl}_3$ )

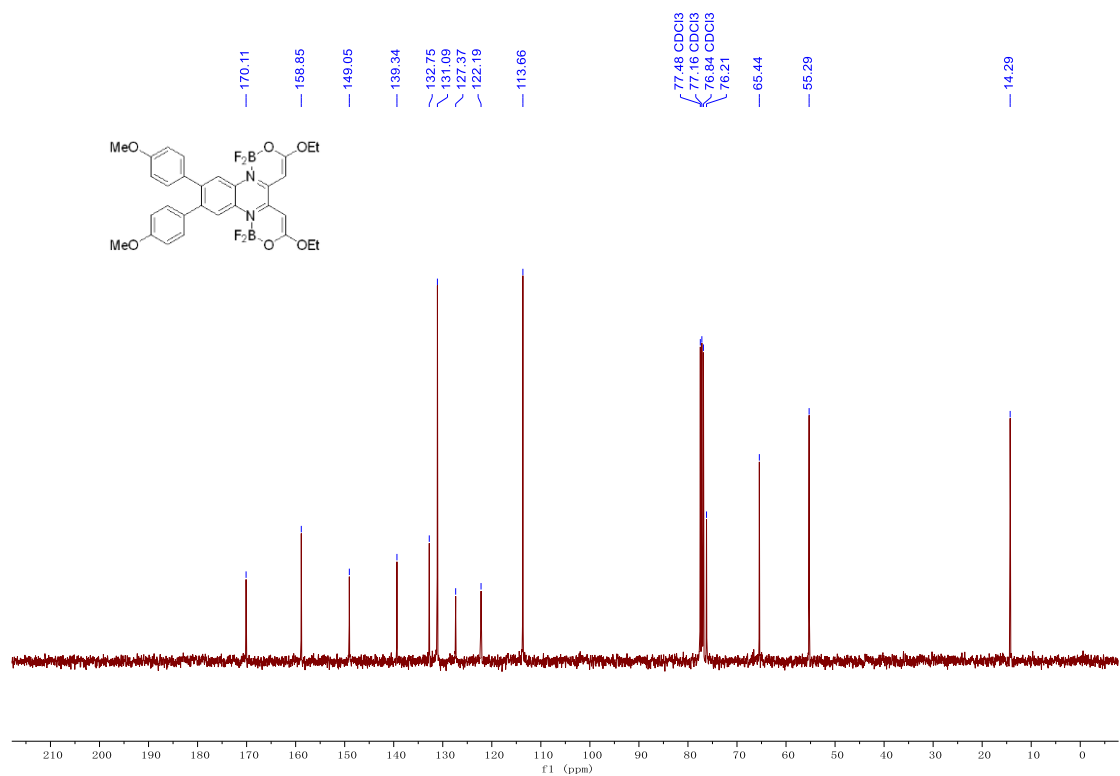

$^{19}\text{F}$  NMR of **4c** (376 MHz,  $\text{CDCl}_3$ )

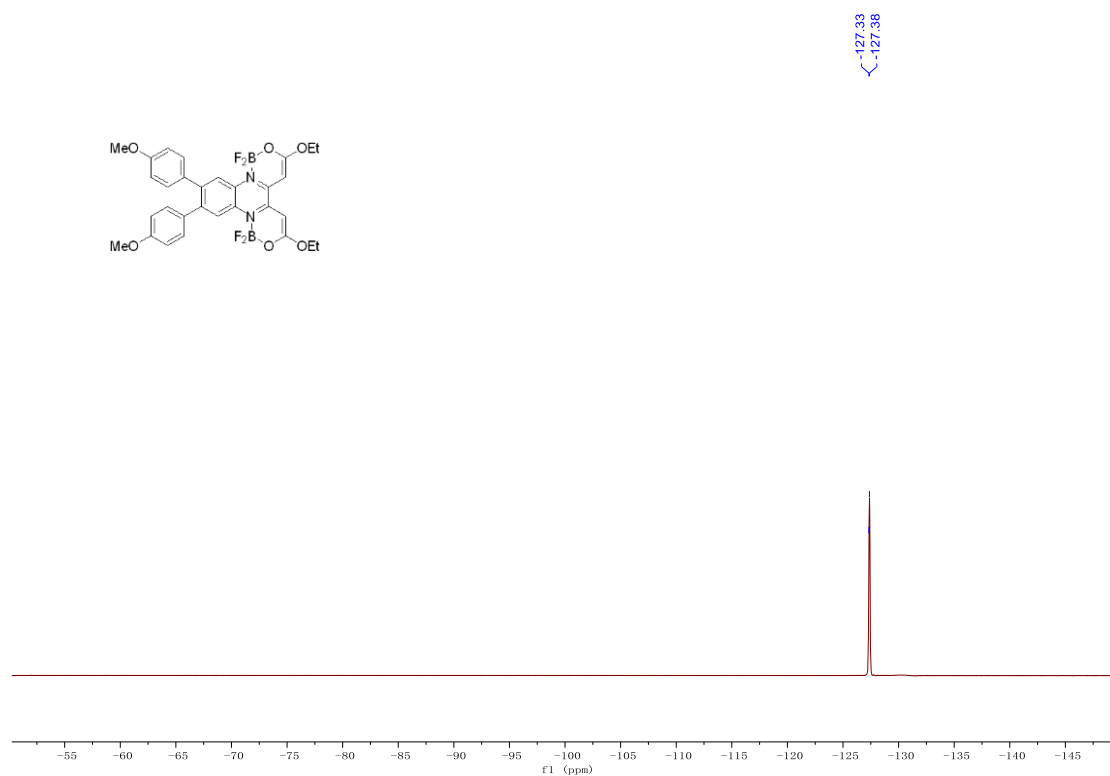

$^{11}\text{B}$  NMR of **4c** (128 MHz,  $\text{CDCl}_3$ )

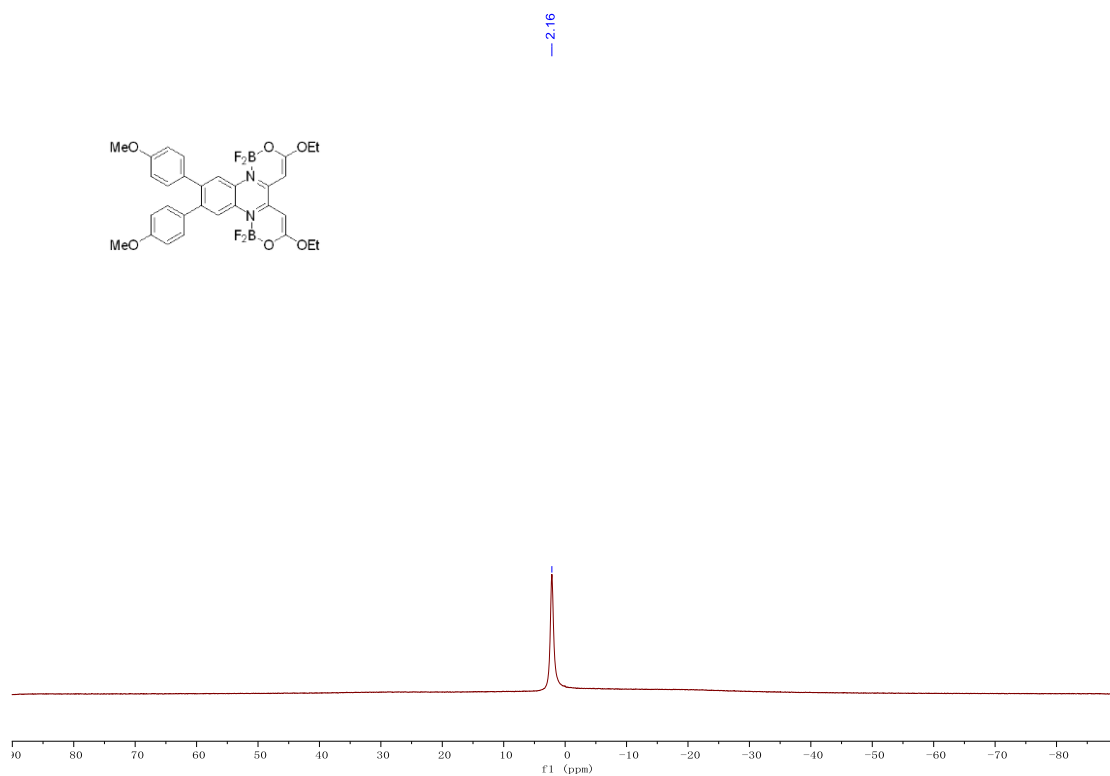

$^1\text{H}$  NMR of **4d** (400 MHz,  $\text{CDCl}_3$ )

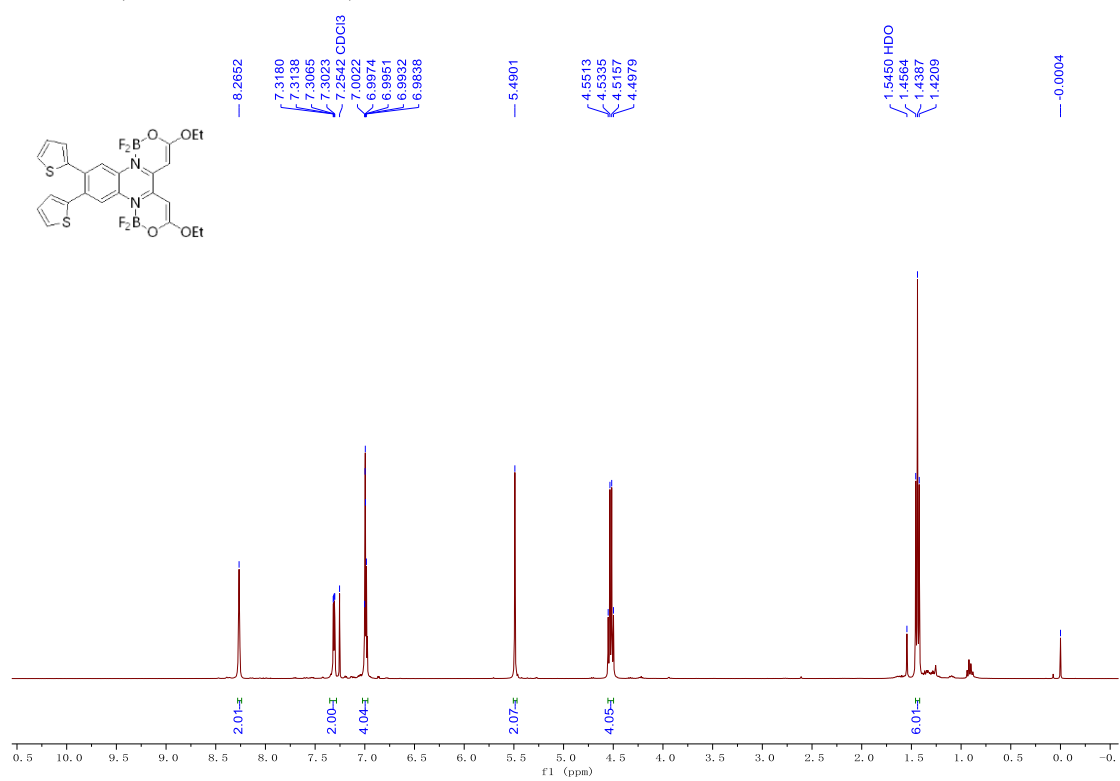

$^{13}\text{C}$  NMR of **4d** (101 MHz,  $\text{CDCl}_3$ )

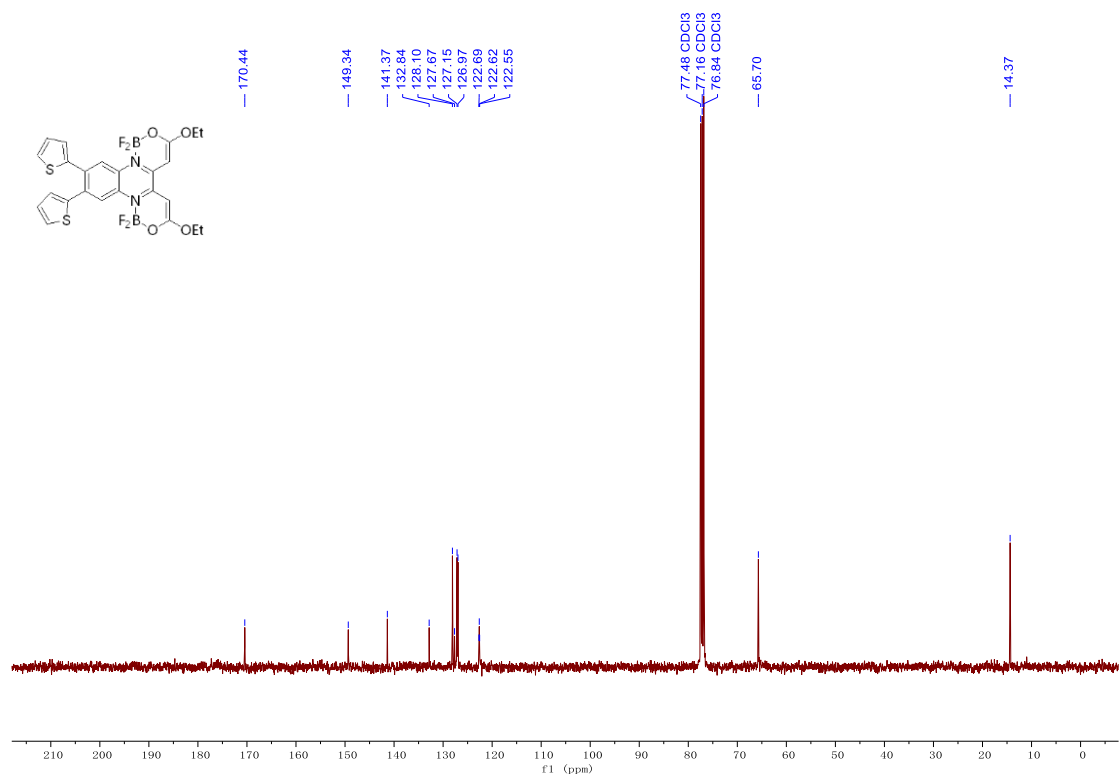

$^{19}\text{F}$  NMR of **4d** (376 MHz,  $\text{CDCl}_3$ )

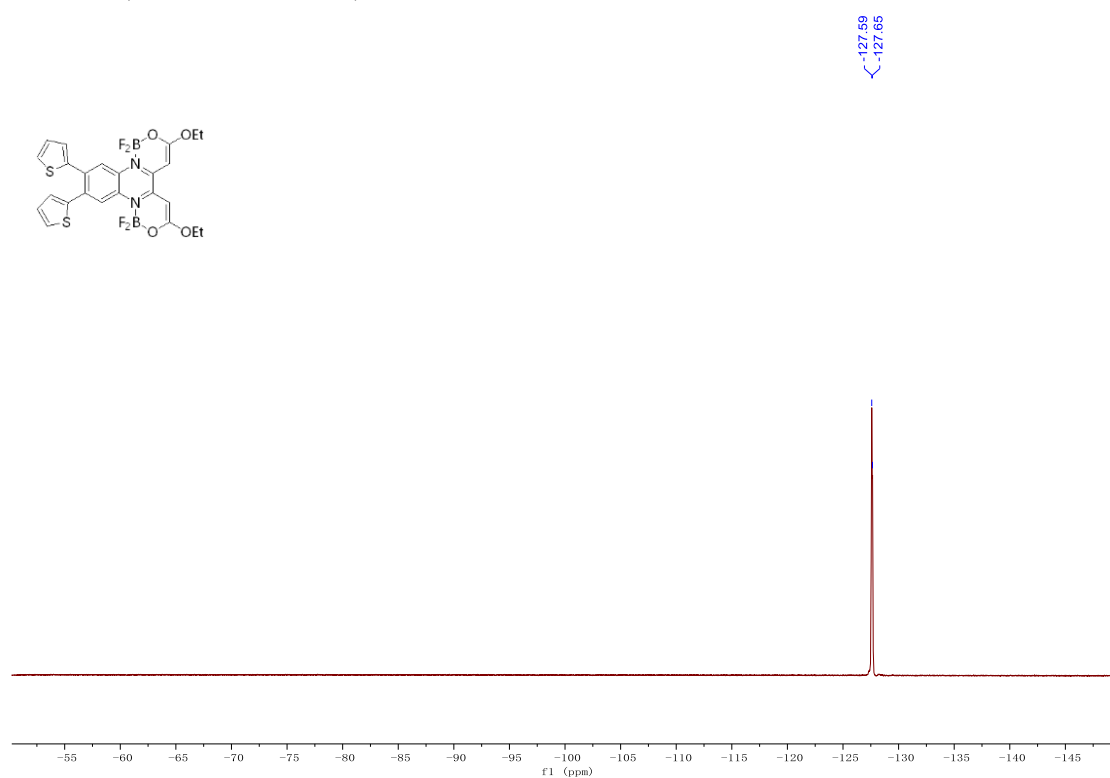

$^{11}\text{B}$  NMR of **4d** (128 MHz,  $\text{CDCl}_3$ )

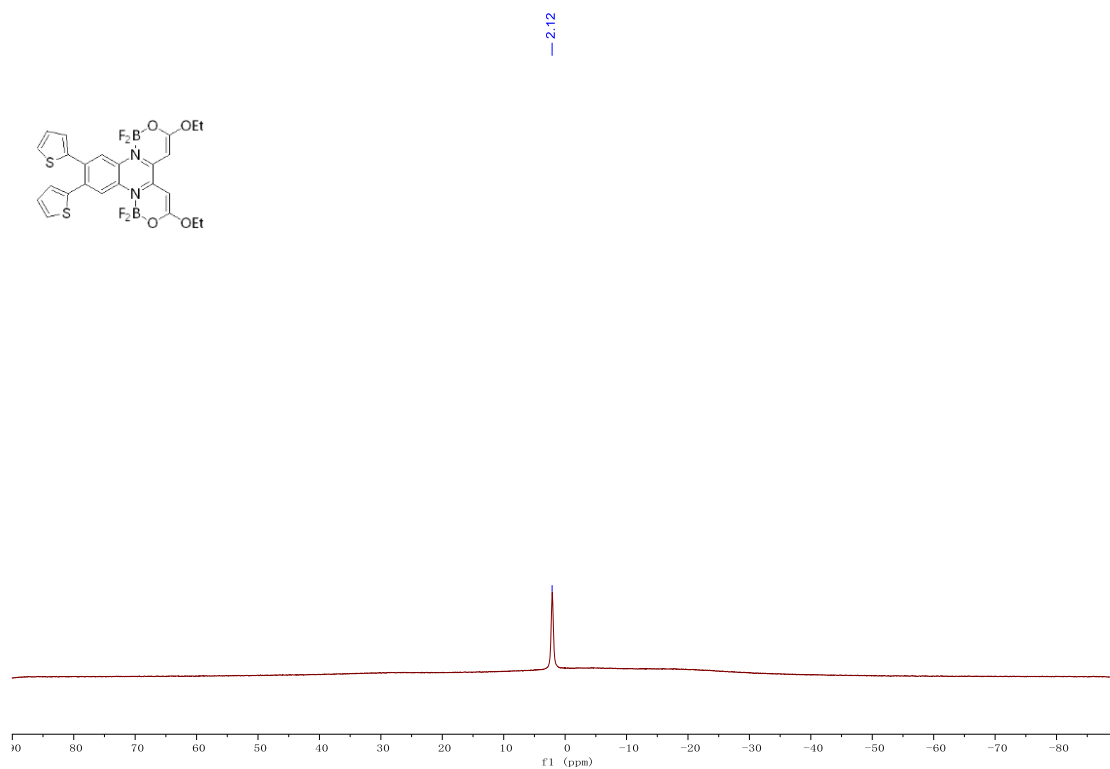

### $^1\text{H}$ NMR of **3e-SO** (400 MHz, $\text{CDCl}_3$ )

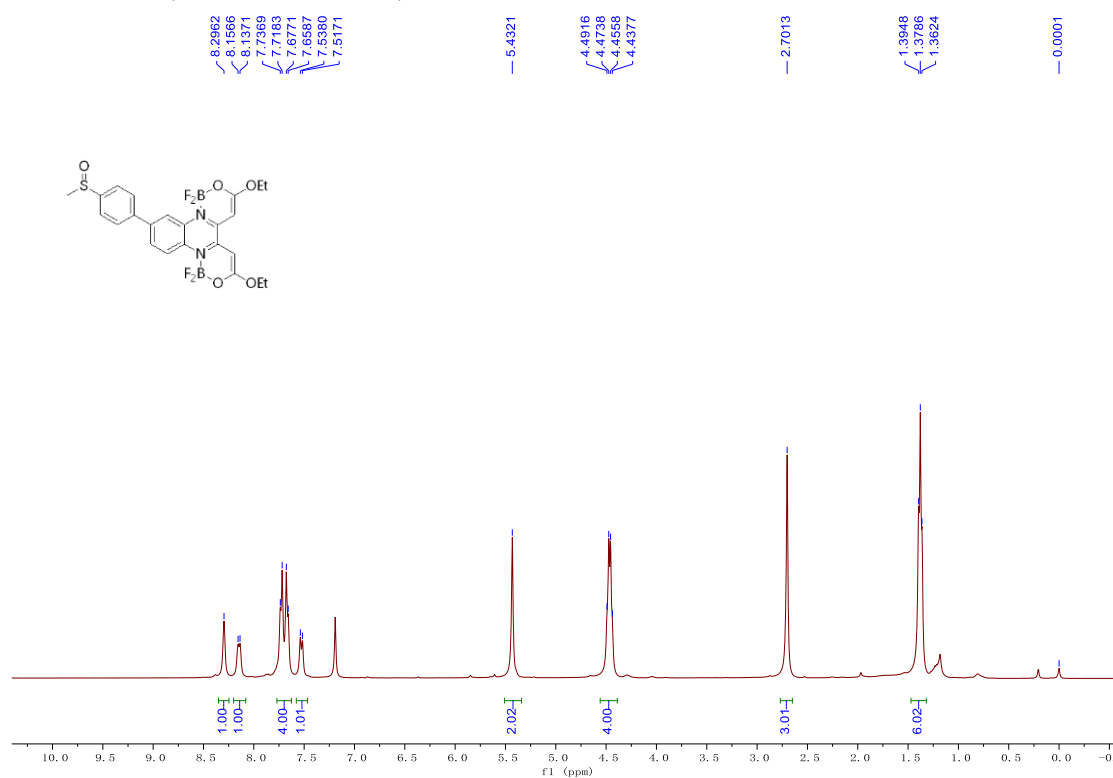

### $^{13}\text{C}$ NMR of **3e-SO** (101 MHz, $\text{CDCl}_3$ )

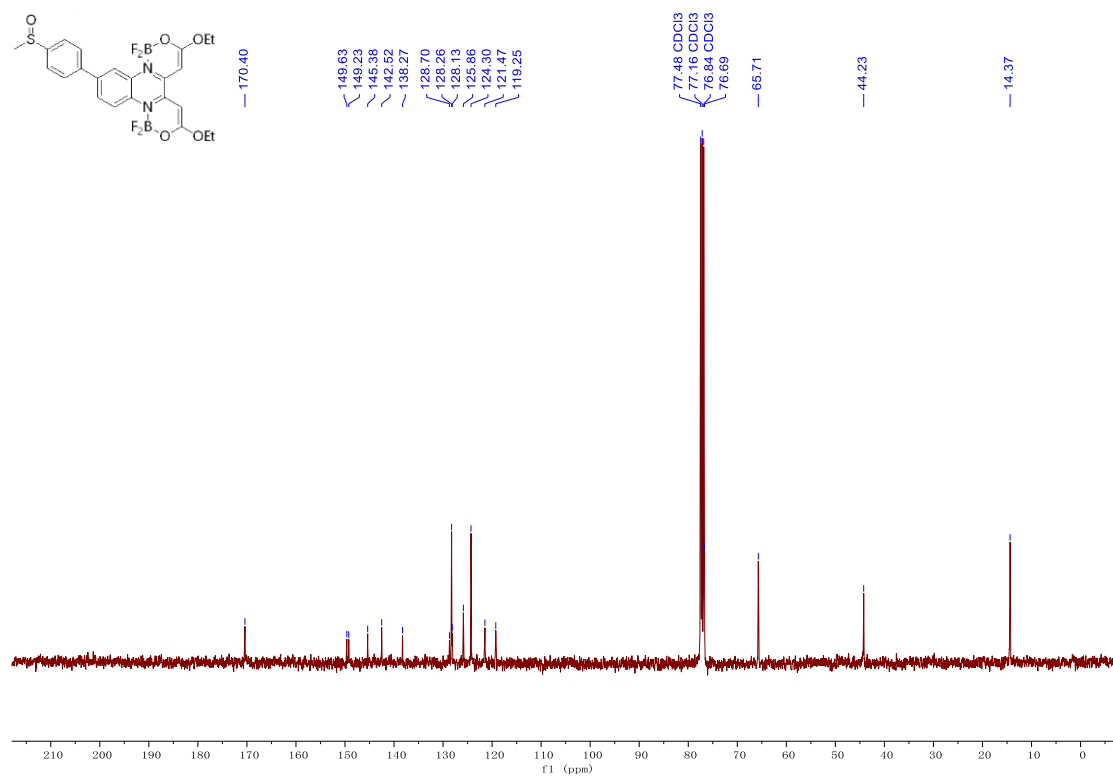

$^{19}\text{F}$  NMR of **3e-SO** (376 MHz,  $\text{CDCl}_3$ )

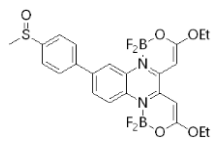

127.19  
127.25  
127.44  
127.50

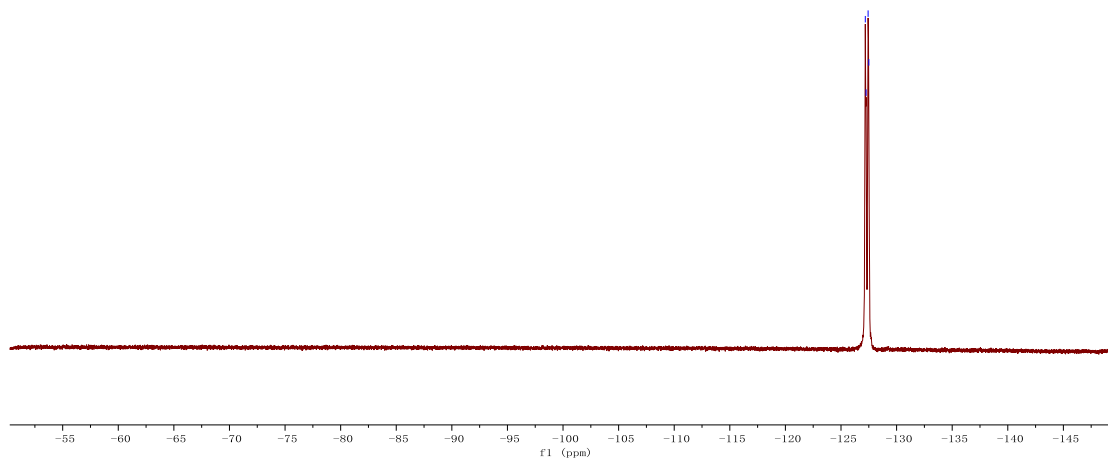

$^{11}\text{B}$  NMR of **3e-SO** (128 MHz,  $\text{CDCl}_3$ )

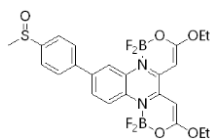

-2.20

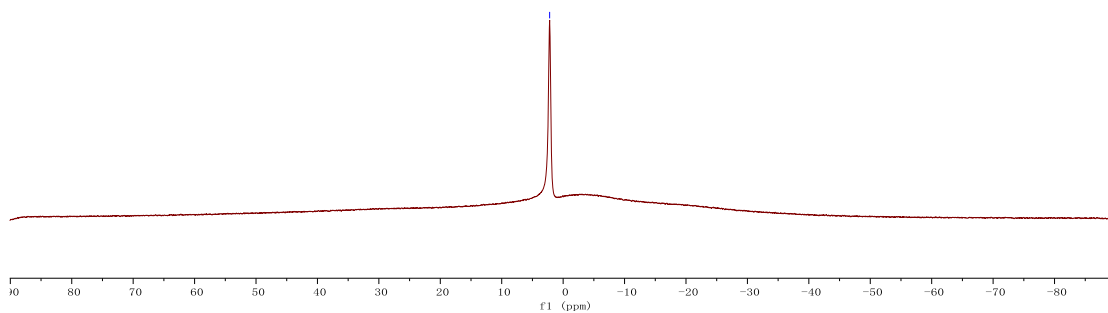

Supplement: d4tc03491k1.pdf [file d4tc03491k1.pdf]
